# Supplementary material for: Recently-adopted foraging strategies constrain early chick development in a coastal breeding gull
Source: PeerJ. 2019 Jul 10;7:e7250. doi: 10.7717/peerj.7250 (PMC6626513; doi:10.7717/peerj.7250)
Supplement: Supplemental Information 2 — We inferred chick diets in a breeding colony from the stable isotope profile of their feathers, and raised chicks in captivity on an either fully marine or terrestrial unrestricted diet to disentangle effects of food composition from food availability. While no effect of diet is found on the realized size, condition or growth rates of chicks in captivity, a stronger terrestrial signature corresponded with smaller realized sizes and lower condition in free-ranging chicks. [file peerj-07-7250-s003.xls]

## Sheet: Sheet1
subject	segment	nest	partner	place	sex	age	date	year	hatch_date	weight	head	bill_L	bill_D	tarsus	wing	P1	P1_increase	hematocrit	comments	treatment	pullus_number	hatch_date_numeric	d13C	d15N	estimate_terrestrial
1	NA	NA		voc	m	0	30-May	2016	30-May	58.9	NA	NA	NA	NA	NA	NA	NA	NA		marine	NA	5	NA	NA	NA
1	NA	NA		voc	m	5	04-Jun	2016	30-May	75	55.1867	NA	NA	NA	NA	NA	NA	27		marine	NA	5	NA	NA	NA
1	NA	NA		voc	m	10	09-Jun	2016	30-May	150	62.705	NA	NA	NA	NA	NA	NA	31		marine	NA	5	NA	NA	NA
1	NA	NA		voc	m	15	14-Jun	2016	30-May	272	72.875	NA	NA	NA	NA	8.19	8.19	27		marine	NA	5	NA	NA	NA
1	NA	NA		voc	m	20	19-Jun	2016	30-May	630	84.79	NA	NA	NA	NA	36.85	28.66	30	forgot to zero weight of towel?	marine	NA	5	NA	NA	NA
1	NA	NA		voc	m	25	24-Jun	2016	30-May	664	92.545	NA	NA	NA	NA	66.69	29.84	27		marine	NA	5	NA	NA	NA
1	NA	NA		voc	m	30	29-Jun	2016	30-May	824	100.525	NA	NA	NA	NA	98.45	31.76	29		marine	NA	5	NA	NA	NA
1	NA	NA		voc	m	35	04-Jul	2016	30-May	878	106.49	NA	NA	NA	NA	127	28.55	32		marine	NA	5	NA	NA	NA
1	NA	NA		voc	m	40	09-Jul	2016	30-May	882	112.195	40.82	15.33	78.7	541	140.71	13.71	36		marine	NA	5	NA	NA	NA
10	NA	NA		voc	f	0	31-May	2016	31-May	66.62	NA	NA	NA	NA	NA	NA	NA	NA		mixed	NA	6	NA	NA	NA
10	NA	NA		voc	f	5	05-Jun	2016	31-May	90	58.8	NA	NA	NA	NA	NA	NA	24		mixed	NA	6	NA	NA	NA
10	NA	NA		voc	f	10	10-Jun	2016	31-May	164	66.485	NA	NA	NA	NA	3.11	3.11	39		mixed	NA	6	NA	NA	NA
10	NA	NA		voc	f	15	15-Jun	2016	31-May	358	77.54	NA	NA	NA	NA	23	19.89	37		mixed	NA	6	NA	NA	NA
10	NA	NA		voc	f	20	20-Jun	2016	31-May	522	86.74	NA	NA	NA	NA	48.52	25.52	NA		mixed	NA	6	NA	NA	NA
10	NA	NA		voc	f	25	25-Jun	2016	31-May	728	93.87	NA	NA	NA	NA	81.33	32.81	34		mixed	NA	6	NA	NA	NA
10	NA	NA		voc	f	30	30-Jun	2016	31-May	860	99.91	NA	NA	NA	NA	112	30.67	35		mixed	NA	6	NA	NA	NA
10	NA	NA		voc	f	35	05-Jul	2016	31-May	872	103.74	NA	NA	NA	NA	131.33	19.33	38		mixed	NA	6	NA	NA	NA
10	NA	NA		voc	f	40	10-Jul	2016	31-May	836	107.71	42.22	14.25	73.42	487	140	8.67	41		mixed	NA	6	NA	NA	NA
11	NA	NA		voc	f	0	31-May	2016	31-May	61.45	NA	NA	NA	NA	NA	NA	NA	NA		terrestrial	NA	6	NA	NA	NA
11	NA	NA		voc	f	5	05-Jun	2016	31-May	93	58.02	NA	NA	NA	NA	NA	NA	33		terrestrial	NA	6	NA	NA	NA
11	NA	NA		voc	f	10	10-Jun	2016	31-May	216	65.21	NA	NA	NA	NA	3.8	3.8	29		terrestrial	NA	6	NA	NA	NA
11	NA	NA		voc	f	15	15-Jun	2016	31-May	320	74.465	NA	NA	NA	NA	18.64	14.84	31		terrestrial	NA	6	NA	NA	NA
11	NA	NA		voc	f	20	20-Jun	2016	31-May	450	83.965	NA	NA	NA	NA	45.5	26.86	30		terrestrial	NA	6	NA	NA	NA
11	NA	NA		voc	f	25	25-Jun	2016	31-May	662	91.53	NA	NA	NA	NA	74.92	29.42	30		terrestrial	NA	6	NA	NA	NA
11	NA	NA		voc	f	30	30-Jun	2016	31-May	848	97.69	NA	NA	NA	NA	107	32.08	30		terrestrial	NA	6	NA	NA	NA
11	NA	NA		voc	f	35	05-Jul	2016	31-May	840	101.88	NA	NA	NA	NA	129.48	22.48	33		terrestrial	NA	6	NA	NA	NA
11	NA	NA		voc	f	40	10-Jul	2016	31-May	812	107.42	43.88	14.42	72.58	492	136	6.52	37		terrestrial	NA	6	NA	NA	NA
12	NA	NA		voc	NA	0	01-Jun	2016	01-Jun	51.71	NA	NA	NA	NA	NA	NA	NA	NA		marine	NA	7	NA	NA	NA
12	NA	NA		voc	NA	5	06-Jun	2016	01-Jun	101	59.51	NA	NA	NA	NA	NA	NA	34		marine	NA	7	NA	NA	NA
12	NA	NA		voc	NA	10	11-Jun	2016	01-Jun	174	69.77	NA	NA	NA	NA	2.21	2.21	26		marine	NA	7	NA	NA	NA
12	NA	NA		voc	NA	15	16-Jun	2016	01-Jun	328	80.56	NA	NA	NA	NA	12.05	9.84	23		marine	NA	7	NA	NA	NA
12	NA	NA		voc	NA	20	21-Jun	2016	01-Jun	526	89.985	NA	NA	NA	NA	30	17.95	25		marine	NA	7	NA	NA	NA
12	NA	NA		voc	NA	25	26-Jun	2016	01-Jun	650	97.45	NA	NA	NA	NA	62.25	32.25	26		marine	NA	7	NA	NA	NA
12	NA	NA		voc	NA	30	01-Jul	2016	01-Jun	776	102.805	NA	NA	NA	NA	96.23	33.98	23		marine	NA	7	NA	NA	NA
12	NA	NA		voc	NA	35	06-Jul	2016	01-Jun	828	110.78	NA	NA	NA	NA	124	27.77	29		marine	NA	7	NA	NA	NA
13	NA	NA		voc	f	0	01-Jun	2016	01-Jun	65.82	NA	NA	NA	NA	NA	NA	NA	NA		marine	NA	7	NA	NA	NA
13	NA	NA		voc	f	5	06-Jun	2016	01-Jun	99	58.1	NA	NA	NA	NA	NA	NA	28		marine	NA	7	NA	NA	NA
13	NA	NA		voc	f	10	11-Jun	2016	01-Jun	214	69.085	NA	NA	NA	NA	3.56	3.56	23		marine	NA	7	NA	NA	NA
13	NA	NA		voc	f	15	16-Jun	2016	01-Jun	364	79.365	NA	NA	NA	NA	26.78	23.22	23		marine	NA	7	NA	NA	NA
13	NA	NA		voc	f	20	21-Jun	2016	01-Jun	514	88.885	NA	NA	NA	NA	55.8	29.02	25		marine	NA	7	NA	NA	NA
13	NA	NA		voc	f	25	26-Jun	2016	01-Jun	656	95.145	NA	NA	NA	NA	89.73	33.93	25		marine	NA	7	NA	NA	NA
13	NA	NA		voc	f	30	01-Jul	2016	01-Jun	784	100.68	NA	NA	NA	NA	117.74	28.01	27		marine	NA	7	NA	NA	NA
13	NA	NA		voc	f	35	06-Jul	2016	01-Jun	786	106.975	NA	NA	NA	NA	137	19.26	32		marine	NA	7	NA	NA	NA
13	NA	NA		voc	f	40	11-Jul	2016	01-Jun	766	115.25	41.61	13.85	75.56	546	141	4	36		marine	NA	7	NA	NA	NA
14	NA	NA		voc	m	0	01-Jun	2016	01-Jun	58.33	NA	NA	NA	NA	NA	NA	NA	NA		mixed	NA	7	NA	NA	NA
14	NA	NA		voc	m	5	06-Jun	2016	01-Jun	96	56.8	NA	NA	NA	NA	NA	NA	21		mixed	NA	7	NA	NA	NA
14	NA	NA		voc	m	10	11-Jun	2016	01-Jun	196	69.415	NA	NA	NA	NA	4.56	4.56	30		mixed	NA	7	NA	NA	NA
14	NA	NA		voc	m	15	16-Jun	2016	01-Jun	416	83.44	NA	NA	NA	NA	19.49	14.93	25		mixed	NA	7	NA	NA	NA
14	NA	NA		voc	m	20	21-Jun	2016	01-Jun	676	94.14	NA	NA	NA	NA	47.94	28.45	25		mixed	NA	7	NA	NA	NA
14	NA	NA		voc	m	25	26-Jun	2016	01-Jun	799	101.235	NA	NA	NA	NA	85.47	37.53	26		mixed	NA	7	NA	NA	NA
14	NA	NA		voc	m	30	01-Jul	2016	01-Jun	962	108.54	NA	NA	NA	NA	119.7	34.23	29		mixed	NA	7	NA	NA	NA
14	NA	NA		voc	m	35	06-Jul	2016	01-Jun	1020	114.73	NA	NA	NA	NA	142	22.3	30		mixed	NA	7	NA	NA	NA
14	NA	NA		voc	m	40	11-Jul	2016	01-Jun	964	119.72	48.55	16.27	82.12	573	151	9	36		mixed	NA	7	NA	NA	NA
15	NA	NA		voc	f	0	01-Jun	2016	01-Jun	58.34	NA	NA	NA	NA	NA	NA	NA	NA		terrestrial	NA	7	NA	NA	NA
15	NA	NA		voc	f	5	06-Jun	2016	01-Jun	103	58.87	NA	NA	NA	NA	NA	NA	32		terrestrial	NA	7	NA	NA	NA
15	NA	NA		voc	f	10	11-Jun	2016	01-Jun	180	68.3	NA	NA	NA	NA	1.32	1.32	34		terrestrial	NA	7	NA	NA	NA
15	NA	NA		voc	f	15	16-Jun	2016	01-Jun	294	76.885	NA	NA	NA	NA	10.9	9.58	31		terrestrial	NA	7	NA	NA	NA
15	NA	NA		voc	f	20	21-Jun	2016	01-Jun	466	86.335	NA	NA	NA	NA	31.58	20.68	NA		terrestrial	NA	7	NA	NA	NA
15	NA	NA		voc	f	25	26-Jun	2016	01-Jun	640	94.615	NA	NA	NA	NA	63.49	31.91	29		terrestrial	NA	7	NA	NA	NA
15	NA	NA		voc	f	30	01-Jul	2016	01-Jun	766	101.22	NA	NA	NA	NA	96.85	33.36	29		terrestrial	NA	7	NA	NA	NA
15	NA	NA		voc	f	35	06-Jul	2016	01-Jun	836	105.815	NA	NA	NA	NA	124	27.15	31		terrestrial	NA	7	NA	NA	NA
15	NA	NA		voc	f	40	11-Jul	2016	01-Jun	822	110.4	43.51	14.23	73.87	509	138.86	14.86	NA		terrestrial	NA	7	NA	NA	NA
16	NA	NA		voc	f	0	01-Jun	2016	01-Jun	52.67	NA	NA	NA	NA	NA	NA	NA	NA		terrestrial	NA	7	NA	NA	NA
16	NA	NA		voc	f	5	06-Jun	2016	01-Jun	87	53.39	NA	NA	NA	NA	NA	NA	32		terrestrial	NA	7	NA	NA	NA
16	NA	NA		voc	f	10	11-Jun	2016	01-Jun	214	64.335	NA	NA	NA	NA	2.46	2.46	33		terrestrial	NA	7	NA	NA	NA
16	NA	NA		voc	f	15	16-Jun	2016	01-Jun	346	74.46	NA	NA	NA	NA	15.61	13.15	27		terrestrial	NA	7	NA	NA	NA
16	NA	NA		voc	f	20	21-Jun	2016	01-Jun	510	82.525	NA	NA	NA	NA	38.54	22.93	30		terrestrial	NA	7	NA	NA	NA
16	NA	NA		voc	f	25	26-Jun	2016	01-Jun	678	92.135	NA	NA	NA	NA	70.54	32	28		terrestrial	NA	7	NA	NA	NA
16	NA	NA		voc	f	30	01-Jul	2016	01-Jun	786	96.675	NA	NA	NA	NA	101.64	31.1	28		terrestrial	NA	7	NA	NA	NA
16	NA	NA		voc	f	35	06-Jul	2016	01-Jun	824	103.08	NA	NA	NA	NA	125	23.36	32		terrestrial	NA	7	NA	NA	NA
16	NA	NA		voc	f	40	11-Jul	2016	01-Jun	793	106.51	43.61	14.97	74.29	539	131.78	6.78	NA		terrestrial	NA	7	NA	NA	NA
17	NA	NA		voc	f	0	01-Jun	2016	01-Jun	62.27	NA	NA	NA	NA	NA	NA	NA	NA		marine	NA	7	NA	NA	NA
17	NA	NA		voc	f	5	06-Jun	2016	01-Jun	95	57.135	NA	NA	NA	NA	NA	NA	29		marine	NA	7	NA	NA	NA
17	NA	NA		voc	f	10	11-Jun	2016	01-Jun	210	68.6	NA	NA	NA	NA	6.48	6.48	29		marine	NA	7	NA	NA	NA
17	NA	NA		voc	f	15	16-Jun	2016	01-Jun	376	78.455	NA	NA	NA	NA	28.41	21.93	27		marine	NA	7	NA	NA	NA
17	NA	NA		voc	f	20	21-Jun	2016	01-Jun	556	86.125	NA	NA	NA	NA	57.22	28.81	29		marine	NA	7	NA	NA	NA
17	NA	NA		voc	f	25	26-Jun	2016	01-Jun	676	93.31	NA	NA	NA	NA	90.4	33.18	30		marine	NA	7	NA	NA	NA
17	NA	NA		voc	f	30	01-Jul	2016	01-Jun	778	97.775	NA	NA	NA	NA	120.19	29.79	32		marine	NA	7	NA	NA	NA
17	NA	NA		voc	f	35	06-Jul	2016	01-Jun	764	102.08	NA	NA	NA	NA	136	15.81	35		marine	NA	7	NA	NA	NA
17	NA	NA		voc	f	40	11-Jul	2016	01-Jun	715	105.54	40.86	15.07	74.43	533	140.97	4.97	40		marine	NA	7	NA	NA	NA
18	NA	NA		voc	m	0	01-Jun	2016	01-Jun	64.86	NA	NA	NA	NA	NA	NA	NA	NA		mixed	NA	7	NA	NA	NA
18	NA	NA		voc	m	5	06-Jun	2016	01-Jun	104	55.2	NA	NA	NA	NA	NA	NA	NA		mixed	NA	7	NA	NA	NA
18	NA	NA		voc	m	10	11-Jun	2016	01-Jun	176	67.06	NA	NA	NA	NA	4.75	4.75	40		mixed	NA	7	NA	NA	NA
18	NA	NA		voc	m	15	16-Jun	2016	01-Jun	373	79.5	NA	NA	NA	NA	20.88	16.13	27		mixed	NA	7	NA	NA	NA
18	NA	NA		voc	m	20	21-Jun	2016	01-Jun	526	89.155	NA	NA	NA	NA	47.3	26.42	25		mixed	NA	7	NA	NA	NA
18	NA	NA		voc	m	25	26-Jun	2016	01-Jun	746	98.5767	NA	NA	NA	NA	73	25.7	26		mixed	NA	7	NA	NA	NA
18	NA	NA		voc	m	30	01-Jul	2016	01-Jun	956	105.37	NA	NA	NA	NA	116	43	30		mixed	NA	7	NA	NA	NA
18	NA	NA		voc	m	35	06-Jul	2016	01-Jun	1010	111.165	NA	NA	NA	NA	140.5	24.5	32		mixed	NA	7	NA	NA	NA
18	NA	NA		voc	m	40	11-Jul	2016	01-Jun	968	115.72	46.83	15.63	80.85	548	150.64	10.14	38		mixed	NA	7	NA	NA	NA
19	NA	NA		voc	m	0	02-Jun	2016	02-Jun	52.7	NA	NA	NA	NA	NA	NA	NA	NA		marine	NA	8	NA	NA	NA
19	NA	NA		voc	m	5	06-Jun	2016	02-Jun	81.5	55.215	NA	NA	NA	NA	NA	NA	34		marine	NA	8	NA	NA	NA
19	NA	NA		voc	m	10	11-Jun	2016	02-Jun	166	66.77	NA	NA	NA	NA	1	1	30		marine	NA	8	NA	NA	NA
19	NA	NA		voc	m	15	16-Jun	2016	02-Jun	314	78.48	NA	NA	NA	NA	14.28	13.28	25		marine	NA	8	NA	NA	NA
19	NA	NA		voc	m	20	21-Jun	2016	02-Jun	546	88.785	NA	NA	NA	NA	38.09	23.81	25		marine	NA	8	NA	NA	NA
19	NA	NA		voc	m	25	26-Jun	2016	02-Jun	700	97.65	NA	NA	NA	NA	74.85	36.76	23		marine	NA	8	NA	NA	NA
19	NA	NA		voc	m	30	01-Jul	2016	02-Jun	902	104.4	NA	NA	NA	NA	111.04	36.19	23		marine	NA	8	NA	NA	NA
19	NA	NA		voc	m	35	06-Jul	2016	02-Jun	948	112.81	NA	NA	NA	NA	135	23.96	27		marine	NA	8	NA	NA	NA
19	NA	NA		voc	m	40	11-Jul	2016	02-Jun	904	116.68	47.02	15.57	82.22	551	145.73	10.73	39		marine	NA	8	NA	NA	NA
2	NA	NA		voc	f	0	30-May	2016	30-May	61.63	NA	NA	NA	NA	NA	NA	NA	NA		mixed	NA	5	NA	NA	NA
2	NA	NA		voc	f	5	04-Jun	2016	30-May	78	55.41	NA	NA	NA	NA	NA	NA	28		mixed	NA	5	NA	NA	NA
2	NA	NA		voc	f	10	09-Jun	2016	30-May	172	65.4	NA	NA	NA	NA	NA	NA	35		mixed	NA	5	NA	NA	NA
2	NA	NA		voc	f	15	14-Jun	2016	30-May	328	76.065	NA	NA	NA	NA	16.22	16.22	31		mixed	NA	5	NA	NA	NA
2	NA	NA		voc	f	20	19-Jun	2016	30-May	704	86.625	NA	NA	NA	NA	41.91	25.69	28	forgot to zero weight of towel?	mixed	NA	5	NA	NA	NA
2	NA	NA		voc	f	25	24-Jun	2016	30-May	662	93.62	NA	NA	NA	NA	78.95	37.04	NA		mixed	NA	5	NA	NA	NA
2	NA	NA		voc	f	30	29-Jun	2016	30-May	798	101.225	NA	NA	NA	NA	111.06	32.11	30		mixed	NA	5	NA	NA	NA
2	NA	NA		voc	f	35	04-Jul	2016	30-May	818	106.54	NA	NA	NA	NA	134.22	23.16	32		mixed	NA	5	NA	NA	NA
2	NA	NA		voc	f	40	09-Jul	2016	30-May	910	110.12	41.61	15.25	76.76	535	144.12	9.9	36		mixed	NA	5	NA	NA	NA
20	NA	NA		voc	m	0	02-Jun	2016	02-Jun	59	NA	NA	NA	NA	NA	NA	NA	NA		terrestrial	NA	8	NA	NA	NA
20	NA	NA		voc	m	5	07-Jun	2016	02-Jun	118	60.755	NA	NA	NA	NA	NA	NA	30		terrestrial	NA	8	NA	NA	NA
20	NA	NA		voc	m	10	12-Jun	2016	02-Jun	234	72.62	NA	NA	NA	NA	1	1	29		terrestrial	NA	8	NA	NA	NA
20	NA	NA		voc	m	15	17-Jun	2016	02-Jun	382	83.84	NA	NA	NA	NA	17	16	29		terrestrial	NA	8	NA	NA	NA
20	NA	NA		voc	m	20	22-Jun	2016	02-Jun	472	91.315	NA	NA	NA	NA	36.17	19.17	29		terrestrial	NA	8	NA	NA	NA
20	NA	NA		voc	m	25	27-Jun	2016	02-Jun	632	98.75	NA	NA	NA	NA	67.2	31.03	26		terrestrial	NA	8	NA	NA	NA
20	NA	NA		voc	m	30	02-Jul	2016	02-Jun	862	105.545	NA	NA	NA	NA	101.15	33.95	26		terrestrial	NA	8	NA	NA	NA
20	NA	NA		voc	m	35	07-Jul	2016	02-Jun	1010	112.57	NA	NA	NA	NA	127	25.85	29		terrestrial	NA	8	NA	NA	NA
20	NA	NA		voc	m	40	12-Jul	2016	02-Jun	1030	118.86	46.67	16.07	77.69	556	145.44	18.44	33		terrestrial	NA	8	NA	NA	NA
21	NA	NA		voc	m	0	02-Jun	2016	02-Jun	55.84	NA	NA	NA	NA	NA	NA	NA	NA		mixed	NA	8	NA	NA	NA
21	NA	NA		voc	m	5	07-Jun	2016	02-Jun	100	58.465	NA	NA	NA	NA	NA	NA	NA		mixed	NA	8	NA	NA	NA
21	NA	NA		voc	m	10	12-Jun	2016	02-Jun	186	69.845	NA	NA	NA	NA	3.76	3.76	30		mixed	NA	8	NA	NA	NA
21	NA	NA		voc	m	15	17-Jun	2016	02-Jun	344	81.65	NA	NA	NA	NA	19.1	15.34	27		mixed	NA	8	NA	NA	NA
21	NA	NA		voc	m	20	22-Jun	2016	02-Jun	520	91.02	NA	NA	NA	NA	45.71	26.61	26		mixed	NA	8	NA	NA	NA
21	NA	NA		voc	m	25	27-Jun	2016	02-Jun	702	100.095	NA	NA	NA	NA	80.54	34.83	27		mixed	NA	8	NA	NA	NA
21	NA	NA		voc	m	30	02-Jul	2016	02-Jun	804	106.76	NA	NA	NA	NA	109.52	28.98	32		mixed	NA	8	NA	NA	NA
21	NA	NA		voc	m	35	07-Jul	2016	02-Jun	848	112.87	NA	NA	NA	NA	131	21.48	27		mixed	NA	8	NA	NA	NA
21	NA	NA		voc	m	40	12-Jul	2016	02-Jun	832	117.53	46.24	15.61	78.08	567	141	10	37		mixed	NA	8	NA	NA	NA
22	NA	NA		voc	m	0	02-Jun	2016	02-Jun	55	NA	NA	NA	NA	NA	NA	NA	NA		terrestrial	NA	8	NA	NA	NA
22	NA	NA		voc	m	5	07-Jun	2016	02-Jun	95	55.24	NA	NA	NA	NA	NA	NA	34		terrestrial	NA	8	NA	NA	NA
22	NA	NA		voc	m	10	12-Jun	2016	02-Jun	182	66.585	NA	NA	NA	NA	1	1	33		terrestrial	NA	8	NA	NA	NA
22	NA	NA		voc	m	15	17-Jun	2016	02-Jun	328	76.05	NA	NA	NA	NA	12.59	11.59	29		terrestrial	NA	8	NA	NA	NA
22	NA	NA		voc	m	20	22-Jun	2016	02-Jun	470	85.275	NA	NA	NA	NA	30.55	17.96	29		terrestrial	NA	8	NA	NA	NA
22	NA	NA		voc	m	25	27-Jun	2016	02-Jun	632	93.19	NA	NA	NA	NA	64.96	34.41	28		terrestrial	NA	8	NA	NA	NA
22	NA	NA		voc	m	30	02-Jul	2016	02-Jun	844	100.495	NA	NA	NA	NA	99.33	34.37	27		terrestrial	NA	8	NA	NA	NA
22	NA	NA		voc	m	35	07-Jul	2016	02-Jun	926	105.805	NA	NA	NA	NA	125	25.67	30		terrestrial	NA	8	NA	NA	NA
22	NA	NA		voc	m	40	12-Jul	2016	02-Jun	932	110.21	43.66	15.23	76.21	532	140	15	32		terrestrial	NA	8	NA	NA	NA
23	NA	NA		voc	m	0	02-Jun	2016	02-Jun	55	NA	NA	NA	NA	NA	NA	NA	NA		mixed	NA	8	NA	NA	NA
23	NA	NA		voc	m	5	07-Jun	2016	02-Jun	107	57.875	NA	NA	NA	NA	NA	NA	36		mixed	NA	8	NA	NA	NA
23	NA	NA		voc	m	10	12-Jun	2016	02-Jun	250	70.27	NA	NA	NA	NA	3.64	3.64	32		mixed	NA	8	NA	NA	NA
23	NA	NA		voc	m	15	17-Jun	2016	02-Jun	454	83.285	NA	NA	NA	NA	22.7	19.06	32		mixed	NA	8	NA	NA	NA
23	NA	NA		voc	m	20	22-Jun	2016	02-Jun	670	93.105	NA	NA	NA	NA	58.33	35.63	NA		mixed	NA	8	NA	NA	NA
23	NA	NA		voc	m	25	27-Jun	2016	02-Jun	818	100.815	NA	NA	NA	NA	96.38	38.05	32		mixed	NA	8	NA	NA	NA
23	NA	NA		voc	m	30	02-Jul	2016	02-Jun	904	107.81	NA	NA	NA	NA	126.05	29.67	35		mixed	NA	8	NA	NA	NA
23	NA	NA		voc	m	35	07-Jul	2016	02-Jun	916	111.035	NA	NA	NA	NA	146	19.95	37		mixed	NA	8	NA	NA	NA
23	NA	NA		voc	m	40	12-Jul	2016	02-Jun	850	115.15	44.58	15.56	81.43	558	150	4	39		mixed	NA	8	NA	NA	NA
24	NA	NA		voc	f	0	02-Jun	2016	02-Jun	58	NA	NA	NA	NA	NA	NA	NA	NA		marine	NA	8	NA	NA	NA
24	NA	NA		voc	f	5	07-Jun	2016	02-Jun	93	58.21	NA	NA	NA	NA	NA	NA	35		marine	NA	8	NA	NA	NA
24	NA	NA		voc	f	10	12-Jun	2016	02-Jun	196	69.825	NA	NA	NA	NA	5.68	5.68	28		marine	NA	8	NA	NA	NA
24	NA	NA		voc	f	15	17-Jun	2016	02-Jun	326	78.565	NA	NA	NA	NA	22.21	16.53	20		marine	NA	8	NA	NA	NA
24	NA	NA		voc	f	20	22-Jun	2016	02-Jun	414	86.02	NA	NA	NA	NA	47.23	25.02	NA		marine	NA	8	NA	NA	NA
24	NA	NA		voc	f	25	27-Jun	2016	02-Jun	598	91.84	NA	NA	NA	NA	82.43	35.2	24		marine	NA	8	NA	NA	NA
24	NA	NA		voc	f	30	02-Jul	2016	02-Jun	718	97.575	NA	NA	NA	NA	112.47	30.04	28		marine	NA	8	NA	NA	NA
24	NA	NA		voc	f	35	07-Jul	2016	02-Jun	744	102.105	NA	NA	NA	NA	129	16.53	32		marine	NA	8	NA	NA	NA
24	NA	NA		voc	f	40	12-Jul	2016	02-Jun	734	105.72	40.88	14.02	72.25	522	133	4	41		marine	NA	8	NA	NA	NA
25	NA	NA		voc	f	0	02-Jun	2016	02-Jun	65.8	NA	NA	NA	NA	NA	NA	NA	NA		terrestrial	NA	8	NA	NA	NA
25	NA	NA		voc	f	5	07-Jun	2016	02-Jun	128	58.78	NA	NA	NA	NA	NA	NA	36		terrestrial	NA	8	NA	NA	NA
25	NA	NA		voc	f	10	12-Jun	2016	02-Jun	224	70.11	NA	NA	NA	NA	9.27	9.27	35		terrestrial	NA	8	NA	NA	NA
25	NA	NA		voc	f	15	17-Jun	2016	02-Jun	362	78.785	NA	NA	NA	NA	23.47	14.2	30		terrestrial	NA	8	NA	NA	NA
25	NA	NA		voc	f	20	22-Jun	2016	02-Jun	488	86.63	NA	NA	NA	NA	49.65	26.18	33		terrestrial	NA	8	NA	NA	NA
25	NA	NA		voc	f	25	27-Jun	2016	02-Jun	614	94.095	NA	NA	NA	NA	80.3	30.65	30		terrestrial	NA	8	NA	NA	NA
25	NA	NA		voc	f	30	02-Jul	2016	02-Jun	702	100.72	NA	NA	NA	NA	110.93	30.63	33		terrestrial	NA	8	NA	NA	NA
25	NA	NA		voc	f	35	07-Jul	2016	02-Jun	744	104.33	NA	NA	NA	NA	129	18.07	35		terrestrial	NA	8	NA	NA	NA
25	NA	NA		voc	f	40	12-Jul	2016	02-Jun	748	108.51	41.69	14.25	71.29	543	135	6	39		terrestrial	NA	8	NA	NA	NA
26	NA	NA		voc	f	0	02-Jun	2016	02-Jun	57.5	NA	NA	NA	NA	NA	NA	NA	NA		marine	NA	8	NA	NA	NA
26	NA	NA		voc	f	5	07-Jun	2016	02-Jun	80	56.395	NA	NA	NA	NA	NA	NA	31		marine	NA	8	NA	NA	NA
26	NA	NA		voc	f	10	12-Jun	2016	02-Jun	178	67.745	NA	NA	NA	NA	1.28	1.28	26		marine	NA	8	NA	NA	NA
26	NA	NA		voc	f	15	17-Jun	2016	02-Jun	304	78.325	NA	NA	NA	NA	19.98	18.7	22		marine	NA	8	NA	NA	NA
26	NA	NA		voc	f	20	22-Jun	2016	02-Jun	446	87.22	NA	NA	NA	NA	43.32	23.34	22		marine	NA	8	NA	NA	NA
26	NA	NA		voc	f	25	27-Jun	2016	02-Jun	554	93.54	NA	NA	NA	NA	76.78	33.46	25		marine	NA	8	NA	NA	NA
26	NA	NA		voc	f	30	02-Jul	2016	02-Jun	646	99.905	NA	NA	NA	NA	107.28	30.5	27		marine	NA	8	NA	NA	NA
26	NA	NA		voc	f	35	07-Jul	2016	02-Jun	660	104.22	NA	NA	NA	NA	125.21	17.93	33		marine	NA	8	NA	NA	NA
26	NA	NA		voc	f	40	12-Jul	2016	02-Jun	678	108.68	40.12	14.77	71.23	525	134	8.79	39		marine	NA	8	NA	NA	NA
27	NA	NA		voc	f	0	02-Jun	2016	02-Jun	63.31	NA	NA	NA	NA	NA	NA	NA	NA		mixed	NA	8	NA	NA	NA
27	NA	NA		voc	f	5	07-Jun	2016	02-Jun	93	57.24	NA	NA	NA	NA	NA	NA	37		mixed	NA	8	NA	NA	NA
27	NA	NA		voc	f	10	12-Jun	2016	02-Jun	180	67.02	NA	NA	NA	NA	2.81	2.81	32		mixed	NA	8	NA	NA	NA
27	NA	NA		voc	f	15	17-Jun	2016	02-Jun	326	77.855	NA	NA	NA	NA	21.31	18.5	27		mixed	NA	8	NA	NA	NA
27	NA	NA		voc	f	20	22-Jun	2016	02-Jun	486	86.535	NA	NA	NA	NA	51.43	30.12	NA		mixed	NA	8	NA	NA	NA
27	NA	NA		voc	f	25	27-Jun	2016	02-Jun	620	93.485	NA	NA	NA	NA	87.83	36.4	29		mixed	NA	8	NA	NA	NA
27	NA	NA		voc	f	30	02-Jul	2016	02-Jun	722	98.695	NA	NA	NA	NA	118.09	30.26	34		mixed	NA	8	NA	NA	NA
27	NA	NA		voc	f	35	07-Jul	2016	02-Jun	674	102.56	NA	NA	NA	NA	133	14.91	31		mixed	NA	8	NA	NA	NA
27	NA	NA		voc	f	40	12-Jul	2016	02-Jun	620	103.06	44.62	13.41	70.55	526	136.86	3.86	42		mixed	NA	8	NA	NA	NA
28	NA	NA		voc	m	0	02-Jun	2016	02-Jun	58.34	NA	NA	NA	NA	NA	NA	NA	NA		terrestrial	NA	8	NA	NA	NA
28	NA	NA		voc	m	5	07-Jun	2016	02-Jun	86	56.365	NA	NA	NA	NA	NA	NA	34		terrestrial	NA	8	NA	NA	NA
28	NA	NA		voc	m	10	12-Jun	2016	02-Jun	176	67.755	NA	NA	NA	NA	1	1	NA		terrestrial	NA	8	NA	NA	NA
28	NA	NA		voc	m	15	17-Jun	2016	02-Jun	292	77.655	NA	NA	NA	NA	10.36	9.36	34		terrestrial	NA	8	NA	NA	NA
28	NA	NA		voc	m	20	22-Jun	2016	02-Jun	406	85.975	NA	NA	NA	NA	26.39	16.03	35		terrestrial	NA	8	NA	NA	NA
28	NA	NA		voc	m	25	27-Jun	2016	02-Jun	536	94.105	NA	NA	NA	NA	57.28	30.89	30		terrestrial	NA	8	NA	NA	NA
28	NA	NA		voc	m	30	02-Jul	2016	02-Jun	672	100.27	NA	NA	NA	NA	90.27	32.99	28		terrestrial	NA	8	NA	NA	NA
28	NA	NA		voc	m	35	07-Jul	2016	02-Jun	788	106.37	NA	NA	NA	NA	116	25.73	31		terrestrial	NA	8	NA	NA	NA
28	NA	NA		voc	m	40	12-Jul	2016	02-Jun	854	111.53	45.5	15.63	74.25	556	135	19	32		terrestrial	NA	8	NA	NA	NA
29	NA	NA		voc	m	0	03-Jun	2016	03-Jun	57	NA	NA	NA	NA	NA	NA	NA	NA		marine	NA	9	NA	NA	NA
29	NA	NA		voc	m	5	08-Jun	2016	03-Jun	93	57.66	NA	NA	NA	NA	NA	NA	35		marine	NA	9	NA	NA	NA
29	NA	NA		voc	m	10	13-Jun	2016	03-Jun	166	68.905	NA	NA	NA	NA	3.68	3.68	NA		marine	NA	9	NA	NA	NA
29	NA	NA		voc	m	15	18-Jun	2016	03-Jun	308	79.915	NA	NA	NA	NA	15.6	11.92	24		marine	NA	9	NA	NA	NA
29	NA	NA		voc	m	20	23-Jun	2016	03-Jun	460	89.245	NA	NA	NA	NA	44.13	28.53	22		marine	NA	9	NA	NA	NA
29	NA	NA		voc	m	25	28-Jun	2016	03-Jun	646	96.375	NA	NA	NA	NA	78.58	34.45	21		marine	NA	9	NA	NA	NA
29	NA	NA		voc	m	30	03-Jul	2016	03-Jun	746	103.27	NA	NA	NA	NA	114.17	35.59	27		marine	NA	9	NA	NA	NA
29	NA	NA		voc	m	35	08-Jul	2016	03-Jun	800	110.11	NA	NA	NA	NA	140	25.83	32		marine	NA	9	NA	NA	NA
29	NA	NA		voc	m	40	13-Jul	2016	03-Jun	870	119.43	43.6	15.82	76.2	539	149	9	34		marine	NA	9	NA	NA	NA
3	NA	NA		voc	f	0	30-May	2016	30-May	61.39	NA	NA	NA	NA	NA	NA	NA	NA		terrestrial	NA	5	NA	NA	NA
3	NA	NA		voc	f	5	04-Jun	2016	30-May	84	55.975	NA	NA	NA	NA	NA	NA	NA		terrestrial	NA	5	NA	NA	NA
3	NA	NA		voc	f	10	09-Jun	2016	30-May	168	63.1	NA	NA	NA	NA	NA	NA	35		terrestrial	NA	5	NA	NA	NA
3	NA	NA		voc	f	15	14-Jun	2016	30-May	302	73.685	NA	NA	NA	NA	19.15	19.15	35		terrestrial	NA	5	NA	NA	NA
3	NA	NA		voc	f	20	19-Jun	2016	30-May	660	84.005	NA	NA	NA	NA	39.39	20.24	30	forgot to zero weight of towel?	terrestrial	NA	5	NA	NA	NA
3	NA	NA		voc	f	25	24-Jun	2016	30-May	618	91.68	NA	NA	NA	NA	73.55	34.16	30		terrestrial	NA	5	NA	NA	NA
3	NA	NA		voc	f	30	29-Jun	2016	30-May	724	97.245	NA	NA	NA	NA	106.76	33.21	32		terrestrial	NA	5	NA	NA	NA
3	NA	NA		voc	f	35	04-Jul	2016	30-May	820	102.175	NA	NA	NA	NA	131.84	25.08	33		terrestrial	NA	5	NA	NA	NA
3	NA	NA		voc	f	40	09-Jul	2016	30-May	822	105.335	41.58	13.84	71.07	545	154.28	22.44	36		terrestrial	NA	5	NA	NA	NA
30	NA	NA		voc	f	0	03-Jun	2016	03-Jun	57	NA	NA	NA	NA	NA	NA	NA	NA		mixed	NA	9	NA	NA	NA
30	NA	NA		voc	f	5	08-Jun	2016	03-Jun	105	58.67	NA	NA	NA	NA	NA	NA	35		mixed	NA	9	NA	NA	NA
30	NA	NA		voc	f	10	13-Jun	2016	03-Jun	228	69.245	NA	NA	NA	NA	4.45	4.45	27		mixed	NA	9	NA	NA	NA
30	NA	NA		voc	f	15	18-Jun	2016	03-Jun	366	80.56	NA	NA	NA	NA	25.02	20.57	23		mixed	NA	9	NA	NA	NA
30	NA	NA		voc	f	20	23-Jun	2016	03-Jun	542	88.22	NA	NA	NA	NA	53.59	28.57	24		mixed	NA	9	NA	NA	NA
30	NA	NA		voc	f	25	28-Jun	2016	03-Jun	686	95.26	NA	NA	NA	NA	88.81	35.22	24		mixed	NA	9	NA	NA	NA
30	NA	NA		voc	f	30	03-Jul	2016	03-Jun	764	100.39	NA	NA	NA	NA	117.26	28.45	27		mixed	NA	9	NA	NA	NA
30	NA	NA		voc	f	35	08-Jul	2016	03-Jun	816	104.405	NA	NA	NA	NA	128	10.74	32		mixed	NA	9	NA	NA	NA
30	NA	NA		voc	f	40	13-Jul	2016	03-Jun	788	106.41	44.53	13.43	71.42	552	136	8	37		mixed	NA	9	NA	NA	NA
31	NA	NA		voc	m	0	03-Jun	2016	03-Jun	58	NA	NA	NA	NA	NA	NA	NA	NA		marine	NA	9	NA	NA	NA
31	NA	NA		voc	m	10	13-Jun	2016	03-Jun	196	67.055	NA	NA	NA	NA	1	1	NA		marine	NA	9	NA	NA	NA
31	NA	NA		voc	m	15	18-Jun	2016	03-Jun	370	80.515	NA	NA	NA	NA	15.73	14.73	NA		marine	NA	9	NA	NA	NA
31	NA	NA		voc	m	20	23-Jun	2016	03-Jun	550	90.19	NA	NA	NA	NA	38.51	22.78	27		marine	NA	9	NA	NA	NA
31	NA	NA		voc	m	25	28-Jun	2016	03-Jun	766	98.92	NA	NA	NA	NA	73.17	34.66	25		marine	NA	9	NA	NA	NA
31	NA	NA		voc	m	30	03-Jul	2016	03-Jun	888	105.52	NA	NA	NA	NA	107.89	34.72	NA		marine	NA	9	NA	NA	NA
31	NA	NA		voc	m	35	08-Jul	2016	03-Jun	952	112.715	NA	NA	NA	NA	135	27.11	31		marine	NA	9	NA	NA	NA
31	NA	NA		voc	m	40	13-Jul	2016	03-Jun	944	115.34	44.33	16.65	81.17	564	147	12	34		marine	NA	9	NA	NA	NA
4	NA	NA		voc	f	0	30-May	2016	30-May	51.05	NA	NA	NA	NA	NA	NA	NA	NA		mixed	NA	5	NA	NA	NA
4	NA	NA		voc	f	5	04-Jun	2016	30-May	69	54.5667	NA	NA	NA	NA	NA	NA	29		mixed	NA	5	NA	NA	NA
4	NA	NA		voc	f	10	09-Jun	2016	30-May	144	64.4	NA	NA	NA	NA	NA	NA	38		mixed	NA	5	NA	NA	NA
4	NA	NA		voc	f	15	14-Jun	2016	30-May	306	76.265	NA	NA	NA	NA	12.11	12.11	34		mixed	NA	5	NA	NA	NA
4	NA	NA		voc	f	20	19-Jun	2016	30-May	656	87.05	NA	NA	NA	NA	43.31	31.2	30	forgot to zero weight of towel?	mixed	NA	5	NA	NA	NA
4	NA	NA		voc	f	25	24-Jun	2016	30-May	662	93.88	NA	NA	NA	NA	71.81	28.5	31		mixed	NA	5	NA	NA	NA
4	NA	NA		voc	f	30	29-Jun	2016	30-May	766	100.28	NA	NA	NA	NA	105.8	33.99	31		mixed	NA	5	NA	NA	NA
4	NA	NA		voc	f	35	04-Jul	2016	30-May	814	104.8	NA	NA	NA	NA	126.86	21.06	35		mixed	NA	5	NA	NA	NA
4	NA	NA		voc	f	40	09-Jul	2016	30-May	802	108.265	44.27	14.33	72.73	517	135.78	8.92	38		mixed	NA	5	NA	NA	NA
5	NA	NA		voc	m	0	30-May	2016	30-May	55.04	NA	NA	NA	NA	NA	NA	NA	NA		terrestrial	NA	5	NA	NA	NA
5	NA	NA		voc	m	5	04-Jun	2016	30-May	80	56.1467	NA	NA	NA	NA	NA	NA	32		terrestrial	NA	5	NA	NA	NA
5	NA	NA		voc	m	10	09-Jun	2016	30-May	184	64.44	NA	NA	NA	NA	NA	NA	28		terrestrial	NA	5	NA	NA	NA
5	NA	NA		voc	m	15	14-Jun	2016	30-May	282	74.33	NA	NA	NA	NA	7.53	7.53	34		terrestrial	NA	5	NA	NA	NA
5	NA	NA		voc	m	20	19-Jun	2016	30-May	638	86.47	NA	NA	NA	NA	23.68	16.15	NA	forgot to zero weight of towel?	terrestrial	NA	5	NA	NA	NA
5	NA	NA		voc	m	25	24-Jun	2016	30-May	652	92.73	NA	NA	NA	NA	50.92	27.24	24		terrestrial	NA	5	NA	NA	NA
5	NA	NA		voc	m	30	29-Jun	2016	30-May	810	101.12	NA	NA	NA	NA	85	34.08	25		terrestrial	NA	5	NA	NA	NA
5	NA	NA		voc	m	35	04-Jul	2016	30-May	972	106.82	NA	NA	NA	NA	117.06	32.06	28		terrestrial	NA	5	NA	NA	NA
5	NA	NA		voc	m	40	09-Jul	2016	30-May	986	112.395	45.55	15.6	76.69	530	141.25	24.19	NA		terrestrial	NA	5	NA	NA	NA
6	NA	NA		voc	m	0	31-May	2016	31-May	51.2	NA	NA	NA	NA	NA	NA	NA	NA		marine	NA	6	NA	NA	NA
6	NA	NA		voc	m	5	05-Jun	2016	31-May	82	56.88	NA	NA	NA	NA	NA	NA	NA		marine	NA	6	NA	NA	NA
6	NA	NA		voc	m	10	10-Jun	2016	31-May	150	65.725	NA	NA	NA	NA	3.63	3.63	29		marine	NA	6	NA	NA	NA
6	NA	NA		voc	m	15	15-Jun	2016	31-May	288	77.815	NA	NA	NA	NA	19.08	15.45	25		marine	NA	6	NA	NA	NA
6	NA	NA		voc	m	20	20-Jun	2016	31-May	468	87.575	NA	NA	NA	NA	41.45	22.37	25		marine	NA	6	NA	NA	NA
6	NA	NA		voc	m	25	25-Jun	2016	31-May	646	95.065	NA	NA	NA	NA	72.89	31.44	23		marine	NA	6	NA	NA	NA
6	NA	NA		voc	m	30	30-Jun	2016	31-May	806	101.975	NA	NA	NA	NA	108	35.11	26		marine	NA	6	NA	NA	NA
6	NA	NA		voc	m	35	05-Jul	2016	31-May	858	108.465	NA	NA	NA	NA	131.28	23.28	28		marine	NA	6	NA	NA	NA
6	NA	NA		voc	m	40	10-Jul	2016	31-May	876	114.67	46.03	16.16	74.5	521	144.06	12.78	37		marine	NA	6	NA	NA	NA
7	NA	NA		voc	m	0	31-May	2016	31-May	57.7	NA	NA	NA	NA	NA	NA	NA	NA		terrestrial	NA	6	NA	NA	NA
7	NA	NA		voc	m	5	05-Jun	2016	31-May	93	60.335	NA	NA	NA	NA	NA	NA	NA		terrestrial	NA	6	NA	NA	NA
7	NA	NA		voc	m	10	10-Jun	2016	31-May	252	70.985	NA	NA	NA	NA	4.18	4.18	33		terrestrial	NA	6	NA	NA	NA
7	NA	NA		voc	m	15	15-Jun	2016	31-May	346	80.8	NA	NA	NA	NA	21.52	17.34	39		terrestrial	NA	6	NA	NA	NA
7	NA	NA		voc	m	20	20-Jun	2016	31-May	532	91.875	NA	NA	NA	NA	54.27	32.75	30		terrestrial	NA	6	NA	NA	NA
7	NA	NA		voc	m	25	25-Jun	2016	31-May	726	100.645	NA	NA	NA	NA	75.08	20.81	29		terrestrial	NA	6	NA	NA	NA
7	NA	NA		voc	m	30	30-Jun	2016	31-May	894	107.815	NA	NA	NA	NA	111	35.92	30		terrestrial	NA	6	NA	NA	NA
7	NA	NA		voc	m	35	05-Jul	2016	31-May	906	114.175	NA	NA	NA	NA	136.03	25.03	32		terrestrial	NA	6	NA	NA	NA
7	NA	NA		voc	m	40	10-Jul	2016	31-May	870	117.66	47.38	14.34	76.33	520	146	9.97	34		terrestrial	NA	6	NA	NA	NA
8	NA	NA		voc	NA	0	31-May	2016	31-May	65.33	NA	NA	NA	NA	NA	NA	NA	NA		mixed	NA	6	NA	NA	NA
8	NA	NA		voc	NA	5	05-Jun	2016	31-May	96	58.81	NA	NA	NA	NA	NA	NA	33		mixed	NA	6	NA	NA	NA
8	NA	NA		voc	NA	10	10-Jun	2016	31-May	172	68.585	NA	NA	NA	NA	5	5	33		mixed	NA	6	NA	NA	NA
8	NA	NA		voc	NA	15	15-Jun	2016	31-May	352	79.78	NA	NA	NA	NA	18.45	13.45	25		mixed	NA	6	NA	NA	NA
8	NA	NA		voc	NA	20	20-Jun	2016	31-May	510	90.295	NA	NA	NA	NA	49.09	30.64	29		mixed	NA	6	NA	NA	NA
8	NA	NA		voc	NA	25	25-Jun	2016	31-May	762	98.41	NA	NA	NA	NA	83.38	34.29	31		mixed	NA	6	NA	NA	NA
8	NA	NA		voc	NA	30	30-Jun	2016	31-May	924	105.365	NA	NA	NA	NA	115	31.62	33		mixed	NA	6	NA	NA	NA
8	NA	NA		voc	NA	35	05-Jul	2016	31-May	958	111.155	NA	NA	NA	NA	138.12	23.12	35		mixed	NA	6	NA	NA	NA
8	NA	NA		voc	NA	40	10-Jul	2016	31-May	948	116.16	45.69	15.04	80.01	544	148	9.88	39		mixed	NA	6	NA	NA	NA
9	NA	NA		voc	f	0	31-May	2016	31-May	50.77	NA	NA	NA	NA	NA	NA	NA	NA		marine	NA	6	NA	NA	NA
9	NA	NA		voc	f	5	05-Jun	2016	31-May	85	55.465	NA	NA	NA	NA	NA	NA	30		marine	NA	6	NA	NA	NA
9	NA	NA		voc	f	10	10-Jun	2016	31-May	178	64.065	NA	NA	NA	NA	4.32	4.32	32		marine	NA	6	NA	NA	NA
9	NA	NA		voc	f	15	15-Jun	2016	31-May	308	75.465	NA	NA	NA	NA	20.17	15.85	31		marine	NA	6	NA	NA	NA
9	NA	NA		voc	f	20	20-Jun	2016	31-May	458	83.415	NA	NA	NA	NA	54.51	34.34	27		marine	NA	6	NA	NA	NA
9	NA	NA		voc	f	25	25-Jun	2016	31-May	636	91.065	NA	NA	NA	NA	77.6	23.09	25		marine	NA	6	NA	NA	NA
9	NA	NA		voc	f	30	30-Jun	2016	31-May	756	96.58	NA	NA	NA	NA	111	33.4	NA		marine	NA	6	NA	NA	NA
9	NA	NA		voc	f	35	05-Jul	2016	31-May	738	102.005	NA	NA	NA	NA	129.36	18.36	33		marine	NA	6	NA	NA	NA
9	NA	NA		voc	f	40	10-Jul	2016	31-May	714	105.06	41.34	14.43	74.04	505	136.71	7.35	37		marine	NA	6	NA	NA	NA
Anouka1	a	anouka		field	f	1	08-Jun	2016	07-Jun	67	50.1	NA	NA	29.4	NA	NA	NA	NA	1d -CF	gps	2	13	-21.0926	16.0527	0.236476
Anouka1	a	anouka		field	f	6	13-Jun	2016	07-Jun	173	62.3	NA	NA	37.1	NA	NA	NA	NA		gps	2	13	-21.0926	16.0527	0.236476
Anouka1	a	anouka		field	f	10	17-Jun	2016	07-Jun	267	70.1	NA	NA	43.5	NA	NA	NA	NA		gps	2	13	-21.0926	16.0527	0.236476
Anouka1	a	anouka		field	f	3	10-Jun	2016	07-Jun	107	55.3	NA	NA	33.1	NA	NA	NA	NA		gps	2	13	-21.0926	16.0527	0.236476
Anouka1	a	anouka		field	f	8	15-Jun	2016	07-Jun	203	65.7	NA	NA	38.3	NA	NA	NA	NA		gps	2	13	-21.0926	16.0527	0.236476
Anouka1	b	anouka		field	f	17	24-Jun	2016	07-Jun	479	81.86	NA	NA	54.05	NA	NA	NA	NA		gps	2	13	-19.6701	18.0201	0.126898
Anouka1	b	anouka		field	f	20	27-Jun	2016	07-Jun	586	85.2	NA	NA	59.2	NA	NA	NA	NA		gps	2	13	-19.6701	18.0201	0.126898
Anouka1	b	anouka		field	f	15	22-Jun	2016	07-Jun	475	78.7	NA	NA	50.6	NA	NA	NA	NA		gps	2	13	-19.6701	18.0201	0.126898
Anouka1	b	anouka		field	f	13	20-Jun	2016	07-Jun	392	75.1	NA	NA	49.4	NA	NA	NA	NA		gps	2	13	-19.6701	18.0201	0.126898
Anouka1	c	anouka		field	f	29	06-Jul	2016	07-Jun	NA	96.88	NA	NA	60.04	NA	NA	NA	NA		gps	2	13	-19.0812	17.7646	0.1311
Anouka1	c	anouka		field	f	27	04-Jul	2016	07-Jun	627	94	NA	NA	59.1	NA	NA	NA	NA		gps	2	13	-19.0812	17.7646	0.1311
Anouka1	c	anouka		field	f	24	01-Jul	2016	07-Jun	617	90.7	NA	NA	58.9	NA	NA	NA	NA		gps	2	13	-19.0812	17.7646	0.1311
Anouka1	c	anouka		field	f	22	29-Jun	2016	07-Jun	585	88.8	NA	NA	NA	NA	NA	NA	NA		gps	2	13	-19.0812	17.7646	0.1311
Anouka1	NA	anouka		field	f	31	08-Jul	2016	07-Jun	704	98.6	NA	NA	60.5	NA	NA	NA	NA		gps	2	13	NA	NA	NA
Anouka1	NA	anouka		field	f	36	13-Jul	2016	07-Jun	692	101.34	NA	NA	60.49	NA	NA	NA	NA	ATO.C (r/u)	gps	2	13	NA	NA	NA
Anouka2	a	anouka		field	f	4	10-Jun	2016	06-Jun	102	54.9	NA	NA	30.2	NA	NA	NA	NA		gps	1	12	-19.7674	17.836	0.133479
Anouka2	a	anouka		field	f	7	13-Jun	2016	06-Jun	169	60.5	NA	NA	36.5	NA	NA	NA	NA		gps	1	12	-19.7674	17.836	0.133479
Anouka2	a	anouka		field	f	2	08-Jun	2016	06-Jun	65	49.4	NA	NA	27	NA	NA	NA	NA	2d -CF	gps	1	12	-19.7674	17.836	0.133479
Anouka2	a	anouka		field	f	9	15-Jun	2016	06-Jun	210	65.3	NA	NA	39.4	NA	NA	NA	NA		gps	1	12	-19.7674	17.836	0.133479
Anouka2	b	anouka		field	f	18	24-Jun	2016	06-Jun	440	81.25	NA	NA	55.64	NA	NA	NA	NA		gps	1	12	-19.7421	17.3879	0.153084
Anouka2	b	anouka		field	f	11	17-Jun	2016	06-Jun	287	69.4	NA	NA	41.5	NA	NA	NA	NA		gps	1	12	-19.7421	17.3879	0.153084
Anouka2	b	anouka		field	f	16	22-Jun	2016	06-Jun	477	78.7	NA	NA	52.7	NA	NA	NA	NA		gps	1	12	-19.7421	17.3879	0.153084
Anouka2	b	anouka		field	f	14	20-Jun	2016	06-Jun	394	75.3	NA	NA	51.6	NA	NA	NA	NA		gps	1	12	-19.7421	17.3879	0.153084
Anouka2	c	anouka		field	f	21	27-Jun	2016	06-Jun	541	83.9	NA	NA	56.6	NA	NA	NA	NA		gps	1	12	-19.1456	15.6024	0.238867
Anouka2	c	anouka		field	f	25	01-Jul	2016	06-Jun	585	88.9	NA	NA	58.9	NA	NA	NA	NA		gps	1	12	-19.1456	15.6024	0.238867
Anouka2	c	anouka		field	f	23	29-Jun	2016	06-Jun	529	86.14	NA	NA	58.26	NA	NA	NA	NA		gps	1	12	-19.1456	15.6024	0.238867
Anouka2	c	anouka		field	f	28	04-Jul	2016	06-Jun	565	91.7	NA	NA	61.1	NA	NA	NA	NA		gps	1	12	-19.1456	15.6024	0.238867
Anouka2	c	anouka		field	f	30	06-Jul	2016	06-Jun	680	94.11	NA	NA	59.93	NA	NA	NA	NA		gps	1	12	-19.1456	15.6024	0.238867
Anouka2	NA	anouka		field	f	37	13-Jul	2016	06-Jun	629	98.71	NA	NA	59.96	NA	NA	NA	NA	AP.OX (r/u)	gps	1	12	NA	NA	NA
Anouka2	NA	anouka		field	f	32	08-Jul	2016	06-Jun	620	95.8	NA	NA	60.8	NA	NA	NA	NA		gps	1	12	NA	NA	NA
Bernadette1	a	bernadette		field	m	4	13-Jun	2016	09-Jun	130	58.6	NA	NA	34.3	NA	NA	NA	NA		gps	2	15	-16.2264	19.0271	0.0760422
Bernadette1	a	bernadette		field	m	8	17-Jun	2016	09-Jun	224	69.6	NA	NA	43.7	NA	NA	NA	NA		gps	2	15	-16.2264	19.0271	0.0760422
Bernadette1	a	bernadette		field	m	6	15-Jun	2016	09-Jun	172	64.2	NA	NA	38.5	NA	NA	NA	NA		gps	2	15	-16.2264	19.0271	0.0760422
Bernadette1	a	bernadette		field	m	1	10-Jun	2016	09-Jun	62	50.1	NA	NA	27.7	NA	NA	NA	NA	1d - CF	gps	2	15	-16.2264	19.0271	0.0760422
Bernadette1	b	bernadette		field	m	20	29-Jun	2016	09-Jun	552	93.54	NA	NA	62.49	NA	NA	NA	NA		gps	2	15	-16.3215	18.8674	0.0790627
Bernadette1	b	bernadette		field	m	15	24-Jun	2016	09-Jun	503	86.12	NA	NA	56.34	NA	NA	NA	NA		gps	2	15	-16.3215	18.8674	0.0790627
Bernadette1	b	bernadette		field	m	13	22-Jun	2016	09-Jun	407	82.2	NA	NA	51.9	NA	NA	NA	NA		gps	2	15	-16.3215	18.8674	0.0790627
Bernadette1	b	bernadette		field	m	18	27-Jun	2016	09-Jun	497	90.5	NA	NA	61.2	NA	NA	NA	NA		gps	2	15	-16.3215	18.8674	0.0790627
Bernadette1	c	bernadette		field	m	29	08-Jul	2016	09-Jun	774	105	NA	NA	68.2	NA	NA	NA	NA		gps	2	15	-16.4413	18.5058	0.087127
Bernadette1	c	bernadette		field	m	22	01-Jul	2016	09-Jun	648	96	NA	NA	63.2	NA	NA	NA	NA		gps	2	15	-16.4413	18.5058	0.087127
Bernadette1	c	bernadette		field	m	27	06-Jul	2016	09-Jun	760	102.1	NA	NA	67.11	NA	NA	NA	NA		gps	2	15	-16.4413	18.5058	0.087127
Bernadette1	c	bernadette		field	m	25	04-Jul	2016	09-Jun	739	99.3	NA	NA	66	NA	NA	NA	NA	weight was 539	gps	2	15	-16.4413	18.5058	0.087127
Bernadette1	NA	bernadette		field	m	34	13-Jul	2016	09-Jun	866	112.02	NA	NA	67	NA	NA	NA	NA	AM.OB (r/u)	gps	2	15	NA	NA	NA
Bernadette2	a	bernadette		field	f	1	08-Jun	2016	07-Jun	55	48.8	NA	NA	24.3	NA	NA	NA	NA	1d - CF	gps	1	13	-15.9532	19.4056	0.0683439
Bernadette2	a	bernadette		field	f	6	13-Jun	2016	07-Jun	152	60	NA	NA	36.1	NA	NA	NA	NA		gps	1	13	-15.9532	19.4056	0.0683439
Bernadette2	a	bernadette		field	f	3	10-Jun	2016	07-Jun	73	52.4	NA	NA	25.5	NA	NA	NA	NA		gps	1	13	-15.9532	19.4056	0.0683439
Bernadette2	a	bernadette		field	f	8	15-Jun	2016	07-Jun	203	64.6	NA	NA	38.1	NA	NA	NA	NA		gps	1	13	-15.9532	19.4056	0.0683439
Bernadette2	a	bernadette		field	f	10	17-Jun	2016	07-Jun	262	68.4	NA	NA	41.7	NA	NA	NA	NA		gps	1	13	-15.9532	19.4056	0.0683439
Bernadette2	b	bernadette		field	f	20	27-Jun	2016	07-Jun	478	85.9	NA	NA	56.7	NA	NA	NA	NA		gps	1	13	-16.5736	18.1543	0.0960454
Bernadette2	b	bernadette		field	f	15	22-Jun	2016	07-Jun	399	79.2	NA	NA	49.3	NA	NA	NA	NA		gps	1	13	-16.5736	18.1543	0.0960454
Bernadette2	b	bernadette		field	f	17	24-Jun	2016	07-Jun	474	82.17	NA	NA	53.45	NA	NA	NA	NA		gps	1	13	-16.5736	18.1543	0.0960454
Bernadette2	c	bernadette		field	f	27	04-Jul	2016	07-Jun	635	93.4	NA	NA	59.1	NA	NA	NA	NA		gps	1	13	-16.5669	17.9775	0.100578
Bernadette2	c	bernadette		field	f	24	01-Jul	2016	07-Jun	603	91.3	NA	NA	57.8	NA	NA	NA	NA		gps	1	13	-16.5669	17.9775	0.100578
Bernadette2	c	bernadette		field	f	29	06-Jul	2016	07-Jun	673	95.01	NA	NA	60.75	NA	NA	NA	NA		gps	1	13	-16.5669	17.9775	0.100578
Bernadette2	c	bernadette		field	f	22	29-Jun	2016	07-Jun	516	88.59	NA	NA	55.77	NA	NA	NA	NA		gps	1	13	-16.5669	17.9775	0.100578
Bernadette2	NA	bernadette		field	f	36	13-Jul	2016	07-Jun	669	101.12	NA	NA	59.95	NA	NA	NA	NA	AXO.K (r/u)	gps	1	13	NA	NA	NA
Bernadette2	NA	bernadette		field	f	31	08-Jul	2016	07-Jun	687	97.7	NA	NA	58.7	NA	NA	NA	NA		gps	1	13	NA	NA	NA
C1-1	a	C1		field	f	1	10-Jun	2016	09-Jun	52	49.4	NA	NA	29.7	NA	NA	NA	NA	1d - CF	control	2	15	-19.4861	14.8121	0.294452
C1-1	a	C1		field	f	8	17-Jun	2016	09-Jun	201	66.3	NA	NA	40.1	NA	NA	NA	NA		control	2	15	-19.4861	14.8121	0.294452
C1-1	a	C1		field	f	4	13-Jun	2016	09-Jun	106	56.4	NA	NA	31.2	NA	NA	NA	NA		control	2	15	-19.4861	14.8121	0.294452
C1-1	a	C1		field	f	6	15-Jun	2016	09-Jun	149	61.8	NA	NA	38.2	NA	NA	NA	NA		control	2	15	-19.4861	14.8121	0.294452
C1-1	b	C1		field	f	15	24-Jun	2016	09-Jun	365	77.18	NA	NA	49.71	NA	NA	NA	NA		control	2	15	-19.4261	15.8114	0.231324
C1-1	b	C1		field	f	13	22-Jun	2016	09-Jun	270	74.6	NA	NA	47.2	NA	NA	NA	NA		control	2	15	-19.4261	15.8114	0.231324
C1-1	b	C1		field	f	20	29-Jun	2016	09-Jun	456	84.71	NA	NA	53.61	NA	NA	NA	NA		control	2	15	-19.4261	15.8114	0.231324
C1-1	b	C1		field	f	18	27-Jun	2016	09-Jun	448	82.3	NA	NA	53.2	NA	NA	NA	NA		control	2	15	-19.4261	15.8114	0.231324
C1-1	b	C1		field	f	11	20-Jun	2016	09-Jun	264	72	NA	NA	44.6	NA	NA	NA	NA		control	2	15	-19.4261	15.8114	0.231324
C1-1	c	C1		field	f	27	06-Jul	2016	09-Jun	649	93.79	NA	NA	58.61	NA	NA	NA	NA		control	2	15	-19.0875	13.8568	0.350121
C1-1	c	C1		field	f	22	01-Jul	2016	09-Jun	548	88.4	NA	NA	56.7	NA	NA	NA	NA		control	2	15	-19.0875	13.8568	0.350121
C1-1	c	C1		field	f	25	04-Jul	2016	09-Jun	577	91.6	NA	NA	57	NA	NA	NA	NA		control	2	15	-19.0875	13.8568	0.350121
C1-1	c	C1		field	f	29	08-Jul	2016	09-Jun	670	95.9	NA	NA	58.2	NA	NA	NA	NA		control	2	15	-19.0875	13.8568	0.350121
C1-2	a	C1		field	m	2	08-Jun	2016	06-Jun	78	53.5	NA	NA	29.7	NA	NA	NA	NA	2d - CF	control	1	12	-17.1988	15.9265	0.18028
C1-2	a	C1		field	m	4	10-Jun	2016	06-Jun	117	58.8	NA	NA	32.4	NA	NA	NA	NA		control	1	12	-17.1988	15.9265	0.18028
C1-2	a	C1		field	m	7	13-Jun	2016	06-Jun	216	66.8	NA	NA	40.5	NA	NA	NA	NA		control	1	12	-17.1988	15.9265	0.18028
C1-2	a	C1		field	m	9	15-Jun	2016	06-Jun	274	72.6	NA	NA	44.5	NA	NA	NA	NA		control	1	12	-17.1988	15.9265	0.18028
C1-2	b	C1		field	m	11	17-Jun	2016	06-Jun	323	75.7	NA	NA	47	NA	NA	NA	NA		control	1	12	-17.5777	17.2545	0.13346
C1-2	b	C1		field	m	18	24-Jun	2016	06-Jun	626	90.08	NA	NA	59.34	NA	NA	NA	NA		control	1	12	-17.5777	17.2545	0.13346
C1-2	b	C1		field	m	14	20-Jun	2016	06-Jun	469	83.9	NA	NA	55	NA	NA	NA	NA		control	1	12	-17.5777	17.2545	0.13346
C1-2	b	C1		field	m	16	22-Jun	2016	06-Jun	490	87	NA	NA	54.3	NA	NA	NA	NA		control	1	12	-17.5777	17.2545	0.13346
C1-2	c	C1		field	m	25	01-Jul	2016	06-Jun	797	100.5	NA	NA	61.8	NA	NA	NA	NA		control	1	12	-17.8931	16.6188	0.16236
C1-2	c	C1		field	m	23	29-Jun	2016	06-Jun	669	97.95	NA	NA	65.67	NA	NA	NA	NA		control	1	12	-17.8931	16.6188	0.16236
C1-2	c	C1		field	m	30	06-Jul	2016	06-Jun	894	107.17	NA	NA	62.94	NA	NA	NA	NA		control	1	12	-17.8931	16.6188	0.16236
C1-2	c	C1		field	m	28	04-Jul	2016	06-Jun	855	104.2	NA	NA	65.9	NA	NA	NA	NA	AT.OB (l/u)	control	1	12	-17.8931	16.6188	0.16236
C1-2	c	C1		field	m	21	27-Jun	2016	06-Jun	685	94.8	NA	NA	63.6	NA	NA	NA	NA		control	1	12	-17.8931	16.6188	0.16236
C1-2	NA	C1		field	m	32	08-Jul	2016	06-Jun	874	108.1	NA	NA	65.2	NA	NA	NA	NA		control	1	12	NA	NA	NA
C10-2	a	C10		field	f	2	06-Jun	2016	04-Jun	56	53.1	NA	NA	29.1	NA	NA	NA	NA	2d - CF	control	2	10	-17.3138	18.5578	0.09292
C10-2	a	C10		field	f	4	08-Jun	2016	04-Jun	127	58.67	NA	NA	32.26	NA	NA	NA	NA		control	2	10	-17.3138	18.5578	0.09292
C10-2	a	C10		field	f	9	13-Jun	2016	04-Jun	278	70.5	NA	NA	42.7	NA	NA	NA	NA		control	2	10	-17.3138	18.5578	0.09292
C10-2	a	C10		field	f	6	10-Jun	2016	04-Jun	170	63.4	NA	NA	36.6	NA	NA	NA	NA		control	2	10	-17.3138	18.5578	0.09292
C10-2	b	C10		field	f	13	17-Jun	2016	04-Jun	407	78.4	NA	NA	49.9	NA	NA	NA	NA		control	2	10	-16.1778	19.2358	0.07219
C10-2	b	C10		field	f	11	15-Jun	2016	04-Jun	351	74.1	NA	NA	43.3	NA	NA	NA	NA		control	2	10	-16.1778	19.2358	0.07219
C10-2	b	C10		field	f	18	22-Jun	2016	04-Jun	579	88.2	NA	NA	56.2	NA	NA	NA	NA		control	2	10	-16.1778	19.2358	0.07219
C10-2	b	C10		field	f	20	24-Jun	2016	04-Jun	609	91.11	NA	NA	58.99	NA	NA	NA	NA		control	2	10	-16.1778	19.2358	0.07219
C10-2	b	C10		field	f	16	20-Jun	2016	04-Jun	495	84.7	NA	NA	52.8	NA	NA	NA	NA		control	2	10	-16.1778	19.2358	0.07219
C10-2	c	C10		field	f	23	27-Jun	2016	04-Jun	736	94.8	NA	NA	59.9	NA	NA	NA	NA		control	2	10	-16.6693	18.3729	0.09134
C10-2	c	C10		field	f	27	01-Jul	2016	04-Jun	694	100	NA	NA	62.7	NA	NA	NA	NA	AS.OR (l/u)	control	2	10	-16.6693	18.3729	0.09134
C10-2	c	C10		field	f	25	29-Jun	2016	04-Jun	732	97.99	NA	NA	60.98	NA	NA	NA	NA		control	2	10	-16.6693	18.3729	0.09134
C10-2	c	C10		field	f	30	04-Jul	2016	04-Jun	755	102.1	NA	NA	61.6	NA	NA	NA	NA		control	2	10	-16.6693	18.3729	0.09134
C10-2	NA	C10		field	f	34	08-Jul	2016	04-Jun	652	106	NA	NA	61.3	NA	NA	NA	NA		control	2	10	NA	NA	NA
C10-2	NA	C10		field	f	32	06-Jul	2016	04-Jun	726	104.7	NA	NA	61.94	NA	NA	NA	NA		control	2	10	NA	NA	NA
C2-1	a	C2		field	m	3	08-Jun	2016	05-Jun	87	53.4	NA	NA	28.4	NA	NA	NA	NA		control	1	11	-15.4998	18.6239	0.0775353
C2-1	a	C2		field	m	8	13-Jun	2016	05-Jun	146	63	NA	NA	37.6	NA	NA	NA	NA		control	1	11	-15.4998	18.6239	0.0775353
C2-1	a	C2		field	m	1	06-Jun	2016	05-Jun	54	48.7	NA	NA	26.2	NA	NA	NA	NA	1d - CF	control	1	11	-15.4998	18.6239	0.0775353
C2-1	a	C2		field	m	10	15-Jun	2016	05-Jun	184	66.5	NA	NA	39.5	NA	NA	NA	NA		control	1	11	-15.4998	18.6239	0.0775353
C2-1	a	C2		field	m	5	10-Jun	2016	05-Jun	100	57.7	NA	NA	33.6	NA	NA	NA	NA		control	1	11	-15.4998	18.6239	0.0775353
C2-1	b	C2		field	m	17	22-Jun	2016	05-Jun	593	81.7	NA	NA	52.8	NA	NA	NA	NA		control	1	11	-14.6926	19.4017	0.0602802
C2-1	b	C2		field	m	19	24-Jun	2016	05-Jun	604	84.64	NA	NA	57.87	NA	NA	NA	NA		control	1	11	-14.6926	19.4017	0.0602802
C2-1	b	C2		field	m	15	20-Jun	2016	05-Jun	364	75.8	NA	NA	51.3	NA	NA	NA	NA		control	1	11	-14.6926	19.4017	0.0602802
C2-1	b	C2		field	m	12	17-Jun	2016	05-Jun	279	70.3	NA	NA	44.1	NA	NA	NA	NA		control	1	11	-14.6926	19.4017	0.0602802
C2-1	c	C2		field	m	26	01-Jul	2016	05-Jun	783	97.5	NA	NA	63.7	NA	NA	NA	NA		control	1	11	-14.8081	18.8112	0.068673
C2-1	c	C2		field	m	22	27-Jun	2016	05-Jun	669	91.6	NA	NA	61.4	NA	NA	NA	NA		control	1	11	-14.8081	18.8112	0.068673
C2-1	c	C2		field	m	29	04-Jul	2016	05-Jun	NA	102.3	NA	NA	65.6	NA	NA	NA	NA	ANO.S (r/u)	control	1	11	-14.8081	18.8112	0.068673
C2-1	c	C2		field	m	24	29-Jun	2016	05-Jun	736	94.77	NA	NA	62.77	NA	NA	NA	NA		control	1	11	-14.8081	18.8112	0.068673
C2-1	NA	C2		field	m	31	06-Jul	2016	05-Jun	875	103.83	NA	NA	67.18	NA	NA	NA	NA		control	1	11	NA	NA	NA
C2-1	NA	C2		field	m	38	13-Jul	2016	05-Jun	870	110.26	NA	NA	66.57	NA	NA	NA	NA		control	1	11	NA	NA	NA
C2-1	NA	C2		field	m	33	08-Jul	2016	05-Jun	880	105.7	NA	NA	66.6	NA	NA	NA	NA		control	1	11	NA	NA	NA
C2-2	a	C2		field	m	3	08-Jun	2016	05-Jun	76	51	NA	NA	26	NA	NA	NA	NA		control	2	11	NA	NA	NA
C2-2	a	C2		field	m	1	06-Jun	2016	05-Jun	47	47.6	NA	NA	25	NA	NA	NA	NA	1d - CF	control	2	11	NA	NA	NA
C2-2	a	C2		field	m	5	10-Jun	2016	05-Jun	76	55	NA	NA	32.4	NA	NA	NA	NA		control	2	11	NA	NA	NA
C2-2	a	C2		field	m	8	13-Jun	2016	05-Jun	112	59	NA	NA	33.6	NA	NA	NA	NA		control	2	11	NA	NA	NA
C3-1	a	C3		field	f	2	06-Jun	2016	04-Jun	65	47.6	NA	NA	24.9	NA	NA	NA	NA	2d - eigen	control	1	10	NA	NA	NA
C3-1	a	C3		field	f	4	08-Jun	2016	04-Jun	84	52.6	NA	NA	29.5	NA	NA	NA	NA		control	1	10	NA	NA	NA
C3-1	a	C3		field	f	9	13-Jun	2016	04-Jun	171	61	NA	NA	35.7	NA	NA	NA	NA		control	1	10	NA	NA	NA
C3-1	a	C3		field	f	6	10-Jun	2016	04-Jun	110	56.9	NA	NA	31.4	NA	NA	NA	NA		control	1	10	NA	NA	NA
C3-1	b	C3		field	f	16	20-Jun	2016	04-Jun	274	70.4	NA	NA	42	NA	NA	NA	NA		control	1	10	NA	NA	NA
C3-1	b	C3		field	f	18	22-Jun	2016	04-Jun	332	73.7	NA	NA	46.3	NA	NA	NA	NA		control	1	10	NA	NA	NA
C3-1	b	C3		field	f	20	24-Jun	2016	04-Jun	365	77.1	NA	NA	48.33	NA	NA	NA	NA		control	1	10	NA	NA	NA
C3-1	b	C3		field	f	11	15-Jun	2016	04-Jun	177	63.6	NA	NA	37.2	NA	NA	NA	NA		control	1	10	NA	NA	NA
C3-1	b	C3		field	f	13	17-Jun	2016	04-Jun	166	66.8	NA	NA	40.2	NA	NA	NA	NA		control	1	10	NA	NA	NA
C3-1	c	C3		field	f	23	27-Jun	2016	04-Jun	416	81.4	NA	NA	51.7	NA	NA	NA	NA		control	1	10	NA	NA	NA
C3-1	c	C3		field	f	25	29-Jun	2016	04-Jun	492	83.49	NA	NA	54.64	NA	NA	NA	NA		control	1	10	NA	NA	NA
C3-1	c	C3		field	f	27	01-Jul	2016	04-Jun	499	85.7	NA	NA	54.4	NA	NA	NA	NA		control	1	10	NA	NA	NA
C3-1	c	C3		field	f	30	04-Jul	2016	04-Jun	544	88	NA	NA	56.2	NA	NA	NA	NA		control	1	10	NA	NA	NA
C3-1	NA	C3		field	f	39	13-Jul	2016	04-Jun	623	96.72	NA	NA	57.32	NA	NA	NA	NA	A.VOL (r/u)	control	1	10	NA	NA	NA
C3-1	NA	C3		field	f	32	06-Jul	2016	04-Jun	592	91.27	NA	NA	56.76	NA	NA	NA	NA		control	1	10	NA	NA	NA
C3-1	NA	C3		field	f	34	08-Jul	2016	04-Jun	578	93.8	NA	NA	51.8	NA	NA	NA	NA		control	1	10	NA	NA	NA
C3-2	a	C3		field	NA	2	06-Jun	2016	04-Jun	75	52.8	NA	NA	30.7	NA	NA	NA	NA	2d - eigen	control	2	10	NA	NA	NA
C3-2	a	C3		field	NA	4	08-Jun	2016	04-Jun	126	58.8	NA	NA	33.1	NA	NA	NA	NA		control	2	10	NA	NA	NA
C3-2	a	C3		field	NA	6	10-Jun	2016	04-Jun	152	62.6	NA	NA	36	NA	NA	NA	NA		control	2	10	NA	NA	NA
C3-2	a	C3		field	NA	9	13-Jun	2016	04-Jun	186	67	NA	NA	42.1	NA	NA	NA	NA		control	2	10	NA	NA	NA
C3-2	b	C3		field	NA	16	20-Jun	2016	04-Jun	322	78.7	NA	NA	50.4	NA	NA	NA	NA		control	2	10	NA	NA	NA
C3-2	b	C3		field	NA	18	22-Jun	2016	04-Jun	400	80.7	NA	NA	53.6	NA	NA	NA	NA		control	2	10	NA	NA	NA
C3-2	b	C3		field	NA	11	15-Jun	2016	04-Jun	248	70.7	NA	NA	43.7	NA	NA	NA	NA		control	2	10	NA	NA	NA
C3-2	b	C3		field	NA	13	17-Jun	2016	04-Jun	254	74.6	NA	NA	48.1	NA	NA	NA	NA		control	2	10	NA	NA	NA
C3-2	b	C3		field	NA	20	24-Jun	2016	04-Jun	489	83.6	NA	NA	59.01	NA	NA	NA	NA		control	2	10	NA	NA	NA
C3-2	c	C3		field	NA	25	29-Jun	2016	04-Jun	601	91.94	NA	NA	63.06	NA	NA	NA	NA		control	2	10	NA	NA	NA
C3-2	c	C3		field	NA	27	01-Jul	2016	04-Jun	638	95	NA	NA	63.6	NA	NA	NA	NA		control	2	10	NA	NA	NA
C3-2	c	C3		field	NA	30	04-Jul	2016	04-Jun	818	98.5	NA	NA	65.7	NA	NA	NA	NA		control	2	10	NA	NA	NA
C3-2	c	C3		field	NA	23	27-Jun	2016	04-Jun	532	88.9	NA	NA	61.7	NA	NA	NA	NA		control	2	10	NA	NA	NA
C3-2	NA	C3		field	NA	32	06-Jul	2016	04-Jun	802	100.97	NA	NA	67.13	NA	NA	NA	NA		control	2	10	NA	NA	NA
C3-2	NA	C3		field	NA	34	08-Jul	2016	04-Jun	826	102.5	NA	NA	66.9	NA	NA	NA	NA		control	2	10	NA	NA	NA
C3-2	NA	C3		field	NA	39	13-Jul	2016	04-Jun	871	106.8	NA	NA	68.01	NA	NA	NA	NA	AV.OM (l/u)	control	2	10	NA	NA	NA
C4-1	a	C4		field	m	2	06-Jun	2016	04-Jun	47	48.9	NA	NA	25.1	NA	NA	NA	NA	2d - CF	control	1	10	-17.9531	18.8578	0.091
C4-1	a	C4		field	m	9	13-Jun	2016	04-Jun	216	66.3	NA	NA	42	NA	NA	NA	NA		control	1	10	-17.9531	18.8578	0.091
C4-1	a	C4		field	m	4	08-Jun	2016	04-Jun	94	54.6	NA	NA	29.7	NA	NA	NA	NA		control	1	10	-17.9531	18.8578	0.091
C4-1	a	C4		field	m	6	10-Jun	2016	04-Jun	140	60	NA	NA	33.7	NA	NA	NA	NA		control	1	10	-17.9531	18.8578	0.091
C4-1	b	C4		field	m	16	20-Jun	2016	04-Jun	440	82.5	NA	NA	51.8	NA	NA	NA	NA		control	1	10	-16.1653	19.4926	0.06772
C4-1	b	C4		field	m	13	17-Jun	2016	04-Jun	310	75.2	NA	NA	51.7	NA	NA	NA	NA		control	1	10	-16.1653	19.4926	0.06772
C4-1	b	C4		field	m	11	15-Jun	2016	04-Jun	274	72.1	NA	NA	45.9	NA	NA	NA	NA		control	1	10	-16.1653	19.4926	0.06772
C4-1	b	C4		field	m	20	24-Jun	2016	04-Jun	510	89.03	NA	NA	59.91	NA	NA	NA	NA		control	1	10	-16.1653	19.4926	0.06772
C4-1	b	C4		field	m	18	22-Jun	2016	04-Jun	477	86	NA	NA	56.3	NA	NA	NA	NA		control	1	10	-16.1653	19.4926	0.06772
C4-1	c	C4		field	m	27	01-Jul	2016	04-Jun	626	97	NA	NA	63.1	NA	NA	NA	NA		control	1	10	-15.2273	18.7568	0.07275
C4-1	c	C4		field	m	23	27-Jun	2016	04-Jun	552	91.4	NA	NA	62.5	NA	NA	NA	NA		control	1	10	-15.2273	18.7568	0.07275
C4-1	c	C4		field	m	30	04-Jul	2016	04-Jun	652	99.6	NA	NA	63.7	NA	NA	NA	NA		control	1	10	-15.2273	18.7568	0.07275
C4-1	c	C4		field	m	25	29-Jun	2016	04-Jun	631	94.14	NA	NA	62.82	NA	NA	NA	NA		control	1	10	-15.2273	18.7568	0.07275
C4-1	NA	C4		field	m	39	13-Jul	2016	04-Jun	760	109.66	NA	NA	65.33	NA	NA	NA	NA	A.TOW (l/u)	control	1	10	NA	NA	NA
C4-1	NA	C4		field	m	34	08-Jul	2016	04-Jun	785	105.4	NA	NA	66.3	NA	NA	NA	NA		control	1	10	NA	NA	NA
C4-1	NA	C4		field	m	32	06-Jul	2016	04-Jun	804	103.01	NA	NA	64.49	NA	NA	NA	NA		control	1	10	NA	NA	NA
C4-2	a	C4		field	m	2	06-Jun	2016	04-Jun	74	51.9	NA	NA	28.5	NA	NA	NA	NA	2d - CF	control	2	10	-16.5352	19.7787	0.0659
C4-2	a	C4		field	m	6	10-Jun	2016	04-Jun	166	63.8	NA	NA	38.7	NA	NA	NA	NA		control	2	10	-16.5352	19.7787	0.0659
C4-2	a	C4		field	m	4	08-Jun	2016	04-Jun	123	58.9	NA	NA	34.1	NA	NA	NA	NA		control	2	10	-16.5352	19.7787	0.0659
C4-2	a	C4		field	m	9	13-Jun	2016	04-Jun	277	70.9	NA	NA	46.6	NA	NA	NA	NA		control	2	10	-16.5352	19.7787	0.0659
C4-2	b	C4		field	m	13	17-Jun	2016	04-Jun	415	80.4	NA	NA	55.4	NA	NA	NA	NA		control	2	10	-16.1079	19.4271	0.06847
C4-2	b	C4		field	m	16	20-Jun	2016	04-Jun	528	86.2	NA	NA	61.8	NA	NA	NA	NA		control	2	10	-16.1079	19.4271	0.06847
C4-2	b	C4		field	m	18	22-Jun	2016	04-Jun	599	89.8	NA	NA	62.8	NA	NA	NA	NA		control	2	10	-16.1079	19.4271	0.06847
C4-2	b	C4		field	m	20	24-Jun	2016	04-Jun	629	92.14	NA	NA	64.24	NA	NA	NA	NA		control	2	10	-16.1079	19.4271	0.06847
C4-2	b	C4		field	m	11	15-Jun	2016	04-Jun	349	76.8	NA	NA	50.3	NA	NA	NA	NA		control	2	10	-16.1079	19.4271	0.06847
C4-2	c	C4		field	m	25	29-Jun	2016	04-Jun	791	98.25	NA	NA	66.02	NA	NA	NA	NA		control	2	10	-15.1018	20.1672	0.0545
C4-2	c	C4		field	m	23	27-Jun	2016	04-Jun	661	95.8	NA	NA	67	NA	NA	NA	NA		control	2	10	-15.1018	20.1672	0.0545
C4-2	c	C4		field	m	27	01-Jul	2016	04-Jun	743	101.4	NA	NA	66.3	NA	NA	NA	NA	AS.OJ (l/u)	control	2	10	-15.1018	20.1672	0.0545
C4-2	c	C4		field	m	30	04-Jul	2016	04-Jun	766	104.4	NA	NA	68.2	NA	NA	NA	NA		control	2	10	-15.1018	20.1672	0.0545
C4-2	NA	C4		field	m	34	08-Jul	2016	04-Jun	915	110.5	NA	NA	67	NA	NA	NA	NA		control	2	10	NA	NA	NA
C4-2	NA	C4		field	m	39	13-Jul	2016	04-Jun	882	114.92	NA	NA	67.62	NA	NA	NA	NA		control	2	10	NA	NA	NA
C4-2	NA	C4		field	m	32	06-Jul	2016	04-Jun	914	107.52	NA	NA	68.79	NA	NA	NA	NA		control	2	10	NA	NA	NA
C5-1	a	C5		field	m	2	06-Jun	2016	04-Jun	63	50.94	NA	NA	29.36	NA	NA	NA	NA	2d - CF	control	1	10	-16.212	17.6334	0.10499
C5-1	a	C5		field	m	4	08-Jun	2016	04-Jun	107	56.4	NA	NA	32	NA	NA	NA	NA		control	1	10	-16.212	17.6334	0.10499
C5-1	a	C5		field	m	6	10-Jun	2016	04-Jun	143	62.2	NA	NA	36.5	NA	NA	NA	NA		control	1	10	-16.212	17.6334	0.10499
C5-1	a	C5		field	m	9	13-Jun	2016	04-Jun	268	68.8	NA	NA	45	NA	NA	NA	NA		control	1	10	-16.212	17.6334	0.10499
C5-1	b	C5		field	m	13	17-Jun	2016	04-Jun	435	81.1	NA	NA	55.3	NA	NA	NA	NA		control	1	10	-15.8954	20.1319	0.05812
C5-1	b	C5		field	m	16	20-Jun	2016	04-Jun	546	87.3	NA	NA	59.4	NA	NA	NA	NA		control	1	10	-15.8954	20.1319	0.05812
C5-1	b	C5		field	m	20	24-Jun	2016	04-Jun	674	93.98	NA	NA	65.03	NA	NA	NA	NA		control	1	10	-15.8954	20.1319	0.05812
C5-1	b	C5		field	m	11	15-Jun	2016	04-Jun	338	75.8	NA	NA	49.4	NA	NA	NA	NA		control	1	10	-15.8954	20.1319	0.05812
C5-1	b	C5		field	m	18	22-Jun	2016	04-Jun	626	91.8	NA	NA	62.2	NA	NA	NA	NA		control	1	10	-15.8954	20.1319	0.05812
C5-1	c	C5		field	m	25	29-Jun	2016	04-Jun	822	101.35	NA	NA	65.98	NA	NA	NA	NA		control	1	10	-15.3945	19.156	0.06864
C5-1	c	C5		field	m	30	04-Jul	2016	04-Jun	866	107.2	NA	NA	65.1	NA	NA	NA	NA		control	1	10	-15.3945	19.156	0.06864
C5-1	c	C5		field	m	27	01-Jul	2016	04-Jun	813	104.4	NA	NA	NA	NA	NA	NA	NA	AV.OR (r/u)	control	1	10	-15.3945	19.156	0.06864
C5-1	c	C5		field	m	23	27-Jun	2016	04-Jun	822	98.2	NA	NA	66.8	NA	NA	NA	NA		control	1	10	-15.3945	19.156	0.06864
C5-2	a	C5		field	f	9	13-Jun	2016	04-Jun	253	68.8	NA	NA	46.5	NA	NA	NA	NA		control	2	10	-16.8614	18.5385	0.0902
C5-2	a	C5		field	f	6	10-Jun	2016	04-Jun	142	60.7	NA	NA	36.5	NA	NA	NA	NA		control	2	10	-16.8614	18.5385	0.0902
C5-2	a	C5		field	f	4	08-Jun	2016	04-Jun	112	55.7	NA	NA	32.2	NA	NA	NA	NA		control	2	10	-16.8614	18.5385	0.0902
C5-2	a	C5		field	f	2	06-Jun	2016	04-Jun	63	49.77	NA	NA	29.24	NA	NA	NA	NA	2d - CF	control	2	10	-16.8614	18.5385	0.0902
C5-2	b	C5		field	f	20	24-Jun	2016	04-Jun	608	91.75	NA	NA	63.97	NA	NA	NA	NA		control	2	10	-16.7695	17.7756	0.10734
C5-2	b	C5		field	f	13	17-Jun	2016	04-Jun	419	79	NA	NA	55.6	NA	NA	NA	NA		control	2	10	-16.7695	17.7756	0.10734
C5-2	b	C5		field	f	11	15-Jun	2016	04-Jun	330	74.2	NA	NA	51	NA	NA	NA	NA		control	2	10	-16.7695	17.7756	0.10734
C5-2	b	C5		field	f	18	22-Jun	2016	04-Jun	575	88.5	NA	NA	61.3	NA	NA	NA	NA		control	2	10	-16.7695	17.7756	0.10734
C5-2	b	C5		field	f	16	20-Jun	2016	04-Jun	507	83.8	NA	NA	58.6	NA	NA	NA	NA		control	2	10	-16.7695	17.7756	0.10734
C5-2	c	C5		field	f	23	27-Jun	2016	04-Jun	711	95.8	NA	NA	NA	NA	NA	NA	NA		control	2	10	-16.6714	17.4515	0.11533
C5-2	c	C5		field	f	25	29-Jun	2016	04-Jun	692	98.08	NA	NA	64.29	NA	NA	NA	NA		control	2	10	-16.6714	17.4515	0.11533
C5-2	c	C5		field	f	27	01-Jul	2016	04-Jun	718	100.3	NA	NA	64.8	NA	NA	NA	NA	A.SOA (r/u)	control	2	10	-16.6714	17.4515	0.11533
C6-1	a	C6		field	m	4	08-Jun	2016	04-Jun	110	56.4	NA	NA	31.9	NA	NA	NA	NA		control	2	10	-16.123	19.5386	0.0671554
C6-1	a	C6		field	m	9	13-Jun	2016	04-Jun	179	64.1	NA	NA	40.2	NA	NA	NA	NA		control	2	10	-16.123	19.5386	0.0671554
C6-1	a	C6		field	m	2	06-Jun	2016	04-Jun	62	50.2	NA	NA	26.5	NA	NA	NA	NA	2d - CF	control	2	10	-16.123	19.5386	0.0671554
C6-1	a	C6		field	m	6	10-Jun	2016	04-Jun	130	59.3	NA	NA	34.3	NA	NA	NA	NA		control	2	10	-16.123	19.5386	0.0671554
C6-1	b	C6		field	m	20	24-Jun	2016	04-Jun	580	87.3	NA	NA	57.15	NA	NA	NA	NA		control	2	10	-16.1624	19.1218	0.07376
C6-1	b	C6		field	m	16	20-Jun	2016	04-Jun	433	80.2	NA	NA	49.7	NA	NA	NA	NA		control	2	10	-16.1624	19.1218	0.07376
C6-1	b	C6		field	m	11	15-Jun	2016	04-Jun	243	70.1	NA	NA	41.8	NA	NA	NA	NA		control	2	10	-16.1624	19.1218	0.07376
C6-1	b	C6		field	m	18	22-Jun	2016	04-Jun	490	83.2	NA	NA	54.8	NA	NA	NA	NA		control	2	10	-16.1624	19.1218	0.07376
C6-1	b	C6		field	m	13	17-Jun	2016	04-Jun	270	73.4	NA	NA	47.2	NA	NA	NA	NA		control	2	10	-16.1624	19.1218	0.07376
C6-1	c	C6		field	m	23	27-Jun	2016	04-Jun	654	92.8	NA	NA	61.1	NA	NA	NA	NA		control	2	10	-15.8089	18.9752	0.073502
C6-1	c	C6		field	m	25	29-Jun	2016	04-Jun	682	94.41	NA	NA	63.06	NA	NA	NA	NA		control	2	10	-15.8089	18.9752	0.073502
C6-1	c	C6		field	m	27	01-Jul	2016	04-Jun	734	98	NA	NA	63.1	NA	NA	NA	NA	A.SOT (l/u)	control	2	10	-15.8089	18.9752	0.073502
C6-1	c	C6		field	m	30	04-Jul	2016	04-Jun	851	102.6	NA	NA	64	NA	NA	NA	NA		control	2	10	-15.8089	18.9752	0.073502
C6-1	NA	C6		field	m	39	13-Jul	2016	04-Jun	863	110.99	NA	NA	65.26	NA	NA	NA	NA		control	2	10	NA	NA	NA
C6-1	NA	C6		field	m	32	06-Jul	2016	04-Jun	837	104.39	NA	NA	64.24	NA	NA	NA	NA		control	2	10	NA	NA	NA
C6-1	NA	C6		field	m	34	08-Jul	2016	04-Jun	842	106.6	NA	NA	62.8	NA	NA	NA	NA		control	2	10	NA	NA	NA
C6-2	a	C6		field	m	3	06-Jun	2016	03-Jun	77	52.6	NA	NA	28.2	NA	NA	NA	NA	3d - CF	control	1	9	-15.6118	20.6207	0.0509
C6-2	a	C6		field	m	10	13-Jun	2016	03-Jun	214	69.5	NA	NA	43	NA	NA	NA	NA		control	1	9	-15.6118	20.6207	0.0509
C6-2	a	C6		field	m	5	08-Jun	2016	03-Jun	129	58.2	NA	NA	31.4	NA	NA	NA	NA		control	1	9	-15.6118	20.6207	0.0509
C6-2	a	C6		field	m	7	10-Jun	2016	03-Jun	175	63.6	NA	NA	33.8	NA	NA	NA	NA		control	1	9	-15.6118	20.6207	0.0509
C6-2	b	C6		field	m	19	22-Jun	2016	03-Jun	516	89.5	NA	NA	56.5	NA	NA	NA	NA		control	1	9	-15.9967	18.8577	0.076476
C6-2	b	C6		field	m	14	17-Jun	2016	03-Jun	308	77.2	NA	NA	50.2	NA	NA	NA	NA		control	1	9	-15.9967	18.8577	0.076476
C6-2	b	C6		field	m	12	15-Jun	2016	03-Jun	294	74	NA	NA	46.5	NA	NA	NA	NA		control	1	9	-15.9967	18.8577	0.076476
C6-2	b	C6		field	m	17	20-Jun	2016	03-Jun	484	83.7	NA	NA	54.8	NA	NA	NA	NA		control	1	9	-15.9967	18.8577	0.076476
C6-2	c	C6		field	m	24	27-Jun	2016	03-Jun	704	96.2	NA	NA	63.6	NA	NA	NA	NA		control	1	9	-15.3183	19.7599	0.0593959
C6-2	c	C6		field	m	28	01-Jul	2016	03-Jun	770	102.1	NA	NA	NA	NA	NA	NA	NA	A.POT (l/u)	control	1	9	-15.3183	19.7599	0.0593959
C6-2	c	C6		field	m	21	24-Jun	2016	03-Jun	628	91.25	NA	NA	60.97	NA	NA	NA	NA		control	1	9	-15.3183	19.7599	0.0593959
C6-2	c	C6		field	m	26	29-Jun	2016	03-Jun	686	99.38	NA	NA	64.83	NA	NA	NA	NA		control	1	9	-15.3183	19.7599	0.0593959
C6-2	NA	C6		field	m	40	13-Jul	2016	03-Jun	862	113.81	NA	NA	65.51	NA	NA	NA	NA		control	1	9	NA	NA	NA
C6-2	NA	C6		field	m	33	06-Jul	2016	03-Jun	832	108.79	NA	NA	65.44	NA	NA	NA	NA		control	1	9	NA	NA	NA
C6-2	NA	C6		field	m	31	04-Jul	2016	03-Jun	802	105.5	NA	NA	65.2	NA	NA	NA	NA		control	1	9	NA	NA	NA
C6-2	NA	C6		field	m	35	08-Jul	2016	03-Jun	872	110.6	NA	NA	65.2	NA	NA	NA	NA		control	1	9	NA	NA	NA
C7-1	a	C7		field	f	9	13-Jun	2016	04-Jun	247	67.7	NA	NA	42.7	NA	NA	NA	NA		control	1	10	-16.1474	18.9653	0.07682
C7-1	a	C7		field	f	2	06-Jun	2016	04-Jun	66	50.55	NA	NA	27.76	NA	NA	NA	NA	2d - CF	control	1	10	-16.1474	18.9653	0.07682
C7-1	a	C7		field	f	4	08-Jun	2016	04-Jun	104	55.9	NA	NA	32.1	NA	NA	NA	NA		control	1	10	-16.1474	18.9653	0.07682
C7-1	a	C7		field	f	6	10-Jun	2016	04-Jun	150	60.8	NA	NA	35.7	NA	NA	NA	NA		control	1	10	-16.1474	18.9653	0.07682
C7-1	b	C7		field	f	13	17-Jun	2016	04-Jun	369	76.2	NA	NA	51.1	NA	NA	NA	NA		control	1	10	-15.7012	19.7108	0.06279
C7-1	b	C7		field	f	11	15-Jun	2016	04-Jun	308	71.9	NA	NA	45.9	NA	NA	NA	NA		control	1	10	-15.7012	19.7108	0.06279
C7-1	b	C7		field	f	16	20-Jun	2016	04-Jun	493	81.2	NA	NA	56.5	NA	NA	NA	NA		control	1	10	-15.7012	19.7108	0.06279
C7-1	b	C7		field	f	20	24-Jun	2016	04-Jun	618	88.23	NA	NA	59.06	NA	NA	NA	NA		control	1	10	-15.7012	19.7108	0.06279
C7-1	b	C7		field	f	18	22-Jun	2016	04-Jun	556	84.9	NA	NA	58.6	NA	NA	NA	NA		control	1	10	-15.7012	19.7108	0.06279
C7-1	c	C7		field	f	27	01-Jul	2016	04-Jun	685	97	NA	NA	60.2	NA	NA	NA	NA	A.POL (l/u)	control	1	10	-16.1784	18.6014	0.08416
C7-1	c	C7		field	f	30	04-Jul	2016	04-Jun	752	99.5	NA	NA	62.9	NA	NA	NA	NA		control	1	10	-16.1784	18.6014	0.08416
C7-1	c	C7		field	f	23	27-Jun	2016	04-Jun	721	92.2	NA	NA	59.6	NA	NA	NA	NA		control	1	10	-16.1784	18.6014	0.08416
C7-1	c	C7		field	f	25	29-Jun	2016	04-Jun	658	94.69	NA	NA	62.32	NA	NA	NA	NA		control	1	10	-16.1784	18.6014	0.08416
C7-1	NA	C7		field	f	32	06-Jul	2016	04-Jun	789	102	NA	NA	62.77	NA	NA	NA	NA		control	1	10	NA	NA	NA
C7-1	NA	C7		field	f	34	08-Jul	2016	04-Jun	724	103.1	NA	NA	63.4	NA	NA	NA	NA		control	1	10	NA	NA	NA
C7-1	NA	C7		field	f	39	13-Jul	2016	04-Jun	731	106.29	NA	NA	60.5	NA	NA	NA	NA		control	1	10	NA	NA	NA
C7-2	a	C7		field	f	9	13-Jun	2016	04-Jun	250	69.9	NA	NA	44.1	NA	NA	NA	NA		control	2	10	-16.0061	18.9105	0.07572
C7-2	a	C7		field	f	4	08-Jun	2016	04-Jun	111	56.1	NA	NA	30.8	NA	NA	NA	NA		control	2	10	-16.0061	18.9105	0.07572
C7-2	a	C7		field	f	2	06-Jun	2016	04-Jun	72	51.07	NA	NA	29.42	NA	NA	NA	NA	2d - CF	control	2	10	-16.0061	18.9105	0.07572
C7-2	a	C7		field	f	6	10-Jun	2016	04-Jun	153	62	NA	NA	36	NA	NA	NA	NA		control	2	10	-16.0061	18.9105	0.07572
C7-2	b	C7		field	f	20	24-Jun	2016	04-Jun	542	88.09	NA	NA	58.35	NA	NA	NA	NA		control	2	10	-16.202	19.3588	0.07001
C7-2	b	C7		field	f	18	22-Jun	2016	04-Jun	502	85.1	NA	NA	55.9	NA	NA	NA	NA		control	2	10	-16.202	19.3588	0.07001
C7-2	b	C7		field	f	13	17-Jun	2016	04-Jun	333	76.6	NA	NA	49.6	NA	NA	NA	NA		control	2	10	-16.202	19.3588	0.07001
C7-2	b	C7		field	f	16	20-Jun	2016	04-Jun	430	81	NA	NA	54.1	NA	NA	NA	NA		control	2	10	-16.202	19.3588	0.07001
C7-2	b	C7		field	f	11	15-Jun	2016	04-Jun	289	72.5	NA	NA	46.6	NA	NA	NA	NA		control	2	10	-16.202	19.3588	0.07001
C7-2	c	C7		field	f	30	04-Jul	2016	04-Jun	731	100	NA	NA	60.9	NA	NA	NA	NA		control	2	10	-15.7164	19.0282	0.07184
C7-2	c	C7		field	f	25	29-Jun	2016	04-Jun	642	94.56	NA	NA	61.95	NA	NA	NA	NA		control	2	10	-15.7164	19.0282	0.07184
C7-2	c	C7		field	f	27	01-Jul	2016	04-Jun	654	97.4	NA	NA	60.8	NA	NA	NA	NA	AV.OB (l/u)	control	2	10	-15.7164	19.0282	0.07184
C7-2	c	C7		field	f	23	27-Jun	2016	04-Jun	632	92.6	NA	NA	61.5	NA	NA	NA	NA		control	2	10	-15.7164	19.0282	0.07184
C7-2	NA	C7		field	f	32	06-Jul	2016	04-Jun	724	102.78	NA	NA	62.46	NA	NA	NA	NA		control	2	10	NA	NA	NA
C7-2	NA	C7		field	f	39	13-Jul	2016	04-Jun	716	106.79	NA	NA	61.69	NA	NA	NA	NA		control	2	10	NA	NA	NA
C7-2	NA	C7		field	f	34	08-Jul	2016	04-Jun	681	104	NA	NA	62	NA	NA	NA	NA		control	2	10	NA	NA	NA
C9-1	a	C9		field	m	6	10-Jun	2016	04-Jun	160	63.2	NA	NA	37.7	NA	NA	NA	NA		control	1	10	-15.3863	19.0867	0.06863
C9-1	a	C9		field	m	9	13-Jun	2016	04-Jun	260	68.7	NA	NA	40.7	NA	NA	NA	NA		control	1	10	-15.3863	19.0867	0.06863
C9-1	a	C9		field	m	4	08-Jun	2016	04-Jun	135	56.61	NA	NA	32.53	NA	NA	NA	NA		control	1	10	-15.3863	19.0867	0.06863
C9-1	a	C9		field	m	2	06-Jun	2016	04-Jun	73	50.9	NA	NA	26.9	NA	NA	NA	NA	2d - CF	control	1	10	-15.3863	19.0867	0.06863
C9-1	b	C9		field	m	18	22-Jun	2016	04-Jun	573	87.7	NA	NA	56.1	NA	NA	NA	NA		control	1	10	-15.05	19.8502	0.05753
C9-1	b	C9		field	m	20	24-Jun	2016	04-Jun	584	90.87	NA	NA	59.81	NA	NA	NA	NA		control	1	10	-15.05	19.8502	0.05753
C9-1	b	C9		field	m	13	17-Jun	2016	04-Jun	378	78.1	NA	NA	50.9	NA	NA	NA	NA		control	1	10	-15.05	19.8502	0.05753
C9-1	b	C9		field	m	11	15-Jun	2016	04-Jun	310	73.8	NA	NA	44.6	NA	NA	NA	NA		control	1	10	-15.05	19.8502	0.05753
C9-1	b	C9		field	m	16	20-Jun	2016	04-Jun	480	83.7	NA	NA	51.6	NA	NA	NA	NA		control	1	10	-15.05	19.8502	0.05753
C9-1	c	C9		field	m	27	01-Jul	2016	04-Jun	735	101.6	NA	NA	63.4	NA	NA	NA	NA	AR.OB (l/u)	control	1	10	-15.0601	20.2135	0.0536
C9-1	c	C9		field	m	23	27-Jun	2016	04-Jun	NA	95.4	NA	NA	61.5	NA	NA	NA	NA		control	1	10	-15.0601	20.2135	0.0536
C9-1	c	C9		field	m	25	29-Jun	2016	04-Jun	726	98.57	NA	NA	63.93	NA	NA	NA	NA		control	1	10	-15.0601	20.2135	0.0536
C9-1	c	C9		field	m	30	04-Jul	2016	04-Jun	825	104.2	NA	NA	63.7	NA	NA	NA	NA		control	1	10	-15.0601	20.2135	0.0536
C9-1	NA	C9		field	m	39	13-Jul	2016	04-Jun	769	110.61	NA	NA	65.87	NA	NA	NA	NA	aangebeten?	control	1	10	NA	NA	NA
C9-1	NA	C9		field	m	34	08-Jul	2016	04-Jun	765	108.4	NA	NA	64.6	NA	NA	NA	NA		control	1	10	NA	NA	NA
C9-1	NA	C9		field	m	32	06-Jul	2016	04-Jun	940	106.37	NA	NA	65.66	NA	NA	NA	NA		control	1	10	NA	NA	NA
C9-2	a	C9		field	m	6	10-Jun	2016	04-Jun	168	63.6	NA	NA	36.9	NA	NA	NA	NA		control	2	10	-15.5034	18.9751	0.07123
C9-2	a	C9		field	m	2	06-Jun	2016	04-Jun	82	51.7	NA	NA	27.9	NA	NA	NA	NA	2d - CF	control	2	10	-15.5034	18.9751	0.07123
C9-2	a	C9		field	m	4	08-Jun	2016	04-Jun	129	57.49	NA	NA	35.79	NA	NA	NA	NA		control	2	10	-15.5034	18.9751	0.07123
C9-2	a	C9		field	m	9	13-Jun	2016	04-Jun	224	67.8	NA	NA	42.5	NA	NA	NA	NA		control	2	10	-15.5034	18.9751	0.07123
C9-2	b	C9		field	m	18	22-Jun	2016	04-Jun	574	88.1	NA	NA	57.7	NA	NA	NA	NA		control	2	10	-15.0331	20.658	0.049
C9-2	b	C9		field	m	13	17-Jun	2016	04-Jun	381	77.1	NA	NA	51.3	NA	NA	NA	NA		control	2	10	-15.0331	20.658	0.049
C9-2	b	C9		field	m	16	20-Jun	2016	04-Jun	512	83.7	NA	NA	57.6	NA	NA	NA	NA		control	2	10	-15.0331	20.658	0.049
C9-2	b	C9		field	m	20	24-Jun	2016	04-Jun	638	91.38	NA	NA	63.06	NA	NA	NA	NA		control	2	10	-15.0331	20.658	0.049
C9-2	b	C9		field	m	11	15-Jun	2016	04-Jun	322	72.1	NA	NA	46.2	NA	NA	NA	NA		control	2	10	-15.0331	20.658	0.049
C9-2	c	C9		field	m	25	29-Jun	2016	04-Jun	793	98.4	NA	NA	66.94	NA	NA	NA	NA		control	2	10	-15.2092	18.5487	0.07458
C9-2	c	C9		field	m	23	27-Jun	2016	04-Jun	748	95	NA	NA	66.5	NA	NA	NA	NA		control	2	10	-15.2092	18.5487	0.07458
C9-2	c	C9		field	m	27	01-Jul	2016	04-Jun	817	100.3	NA	NA	NA	NA	NA	NA	NA	AZ.OF (r/u)	control	2	10	-15.2092	18.5487	0.07458
C9-2	c	C9		field	m	30	04-Jul	2016	04-Jun	910	104	NA	NA	69	NA	NA	NA	NA		control	2	10	-15.2092	18.5487	0.07458
C9-2	NA	C9		field	m	39	13-Jul	2016	04-Jun	953	112.65	NA	NA	69.75	NA	NA	NA	NA		control	2	10	NA	NA	NA
C9-2	NA	C9		field	m	32	06-Jul	2016	04-Jun	956	107.09	NA	NA	68.55	NA	NA	NA	NA		control	2	10	NA	NA	NA
C9-2	NA	C9		field	m	34	08-Jul	2016	04-Jun	836	107.6	NA	NA	66.9	NA	NA	NA	NA		control	2	10	NA	NA	NA
Carrie1	a	carrie		field	m	6	08-Jun	2016	02-Jun	131	60.7	NA	NA	34.8	NA	NA	NA	NA		gps	1	8	-21.7985	12.4885	0.493273
Carrie1	a	carrie		field	m	4	06-Jun	2016	02-Jun	82	54.6	NA	NA	29.2	NA	NA	NA	NA		gps	1	8	-21.7985	12.4885	0.493273
Carrie1	a	carrie		field	m	8	10-Jun	2016	02-Jun	205	65.1	NA	NA	37.8	NA	NA	NA	NA		gps	1	8	-21.7985	12.4885	0.493273
Carrie1	a	carrie		field	m	1	03-Jun	2016	02-Jun	50	48.2	NA	NA	25.2	NA	NA	NA	NA	1d - CF	gps	1	8	-21.7985	12.4885	0.493273
Carrie1	b	carrie		field	m	13	15-Jun	2016	02-Jun	341	76.3	NA	NA	47.5	NA	NA	NA	NA		gps	1	8	-22.3648	11.5401	0.5649
Carrie1	b	carrie		field	m	15	17-Jun	2016	02-Jun	421	80	NA	NA	52.3	NA	NA	NA	NA		gps	1	8	-22.3648	11.5401	0.5649
Carrie1	b	carrie		field	m	18	20-Jun	2016	02-Jun	458	84.6	NA	NA	57.8	NA	NA	NA	NA		gps	1	8	-22.3648	11.5401	0.5649
Carrie1	b	carrie		field	m	20	22-Jun	2016	02-Jun	577	88	NA	NA	NA	NA	NA	NA	NA		gps	1	8	-22.3648	11.5401	0.5649
Carrie1	b	carrie		field	m	11	13-Jun	2016	02-Jun	294	72	NA	NA	45.9	NA	NA	NA	NA		gps	1	8	-22.3648	11.5401	0.5649
Carrie1	c	carrie		field	m	25	27-Jun	2016	02-Jun	594	94.2	NA	NA	60.8	NA	NA	NA	NA		gps	1	8	-21.8808	11.7327	0.542671
Carrie1	c	carrie		field	m	22	24-Jun	2016	02-Jun	609	91.41	NA	NA	60.19	NA	NA	NA	NA		gps	1	8	-21.8808	11.7327	0.542671
Carrie1	c	carrie		field	m	29	01-Jul	2016	02-Jun	683	98.8	NA	NA	61.2	NA	NA	NA	NA		gps	1	8	-21.8808	11.7327	0.542671
Carrie1	c	carrie		field	m	27	29-Jun	2016	02-Jun	583	96.86	NA	NA	62.16	NA	NA	NA	NA		gps	1	8	-21.8808	11.7327	0.542671
Carrie1	NA	carrie		field	m	34	06-Jul	2016	02-Jun	723	101.34	NA	NA	63.36	NA	NA	NA	NA		gps	1	8	NA	NA	NA
Carrie1	NA	carrie		field	m	32	04-Jul	2016	02-Jun	596	100.2	NA	NA	62.2	NA	NA	NA	NA		gps	1	8	NA	NA	NA
Carrie1	NA	carrie		field	m	41	13-Jul	2016	02-Jun	728	108.17	NA	NA	62.7	NA	NA	NA	NA	AX.OF (l/u)	gps	1	8	NA	NA	NA
Carrie1	NA	carrie		field	m	36	08-Jul	2016	02-Jun	640	103.6	NA	NA	62.7	NA	NA	NA	NA		gps	1	8	NA	NA	NA
Carrie2	a	carrie		field	m	8	10-Jun	2016	02-Jun	256	70.4	NA	NA	40.7	NA	NA	NA	NA		gps	2	8	-20.6573	13.5721	0.403671
Carrie2	a	carrie		field	m	4	06-Jun	2016	02-Jun	100	59.3	NA	NA	32.3	NA	NA	NA	NA		gps	2	8	-20.6573	13.5721	0.403671
Carrie2	a	carrie		field	m	1	03-Jun	2016	02-Jun	67	51.2	NA	NA	28	NA	NA	NA	NA	1d - CF	gps	2	8	-20.6573	13.5721	0.403671
Carrie2	a	carrie		field	m	6	08-Jun	2016	02-Jun	164	65.3	NA	NA	38	NA	NA	NA	NA		gps	2	8	-20.6573	13.5721	0.403671
Carrie2	b	carrie		field	m	11	13-Jun	2016	02-Jun	358	76.7	NA	NA	47.3	NA	NA	NA	NA		gps	2	8	-21.7259	11.8928	0.529224
Carrie2	b	carrie		field	m	13	15-Jun	2016	02-Jun	394	80.1	NA	NA	50.3	NA	NA	NA	NA		gps	2	8	-21.7259	11.8928	0.529224
Carrie2	b	carrie		field	m	20	22-Jun	2016	02-Jun	598	92	NA	NA	56.9	NA	NA	NA	NA		gps	2	8	-21.7259	11.8928	0.529224
Carrie2	b	carrie		field	m	18	20-Jun	2016	02-Jun	500	88.2	NA	NA	55.7	NA	NA	NA	NA		gps	2	8	-21.7259	11.8928	0.529224
Carrie2	b	carrie		field	m	15	17-Jun	2016	02-Jun	466	83.7	NA	NA	52.2	NA	NA	NA	NA		gps	2	8	-21.7259	11.8928	0.529224
Carrie2	c	carrie		field	m	29	01-Jul	2016	02-Jun	640	102.1	NA	NA	60.7	NA	NA	NA	NA		gps	2	8	-21.1431	12.9265	0.453248
Carrie2	c	carrie		field	m	22	24-Jun	2016	02-Jun	616	94.24	NA	NA	59.14	NA	NA	NA	NA		gps	2	8	-21.1431	12.9265	0.453248
Carrie2	c	carrie		field	m	27	29-Jun	2016	02-Jun	596	99.32	NA	NA	61.11	NA	NA	NA	NA		gps	2	8	-21.1431	12.9265	0.453248
Carrie2	c	carrie		field	m	25	27-Jun	2016	02-Jun	597	98.2	NA	NA	NA	NA	NA	NA	NA		gps	2	8	-21.1431	12.9265	0.453248
Carrie2	NA	carrie		field	m	34	06-Jul	2016	02-Jun	687	105.04	NA	NA	61.61	NA	NA	NA	NA		gps	2	8	NA	NA	NA
Carrie2	NA	carrie		field	m	36	08-Jul	2016	02-Jun	697	106.9	NA	NA	61.78	NA	NA	NA	NA		gps	2	8	NA	NA	NA
Carrie2	NA	carrie		field	m	32	04-Jul	2016	02-Jun	NA	NA	NA	NA	NA	NA	NA	NA	NA	Ontsnapt? Leeft nog wsl	gps	2	8	NA	NA	NA
Delphine1	a	delphine		field	NA	1	15-Jun	2016	14-Jun	62	48.2	NA	NA	NA	NA	NA	NA	NA		gps	1	20	NA	NA	NA
Delphine1	a	delphine		field	NA	3	17-Jun	2016	14-Jun	74	52.4	NA	NA	NA	NA	NA	NA	NA		gps	1	20	NA	NA	NA
Delphine1	a	delphine		field	NA	8	22-Jun	2016	14-Jun	199	64.4	NA	NA	NA	NA	NA	NA	NA		gps	1	20	NA	NA	NA
Delphine2	a	delphine		field	NA	6	20-Jun	2016	14-Jun	134	58.5	NA	NA	NA	NA	NA	NA	NA		gps	2	20	NA	NA	NA
Delphine2	a	delphine		field	NA	8	22-Jun	2016	14-Jun	199	64.7	NA	NA	NA	NA	NA	NA	NA		gps	2	20	NA	NA	NA
Delphine2	a	delphine		field	NA	1	15-Jun	2016	14-Jun	54	48.4	NA	NA	NA	NA	NA	NA	NA		gps	2	20	NA	NA	NA
Delphine2	a	delphine		field	NA	3	17-Jun	2016	14-Jun	67	52.4	NA	NA	NA	NA	NA	NA	NA		gps	2	20	NA	NA	NA
Delphine2	b	delphine		field	NA	20	04-Jul	2016	14-Jun	NA	NA	NA	NA	NA	NA	NA	NA	NA	DOOD	gps	2	20	NA	NA	NA
Delphine2	b	delphine		field	NA	17	01-Jul	2016	14-Jun	NA	66.8	NA	NA	NA	NA	NA	NA	NA		gps	2	20	NA	NA	NA
Delphine2	b	delphine		field	NA	13	27-Jun	2016	14-Jun	351	78.3	NA	NA	NA	NA	NA	NA	NA		gps	2	20	NA	NA	NA
Dirk1	a	dirk		field	m	4	03-Jun	2016	30-May	166	62.1	NA	NA	33.5	NA	NA	NA	NA		gps	1	5	-14.9465	20.6135	0.049
Dirk1	a	dirk		field	m	9	08-Jun	2016	30-May	321	73	NA	NA	49.1	NA	NA	NA	NA		gps	1	5	-14.9465	20.6135	0.049
Dirk1	a	dirk		field	m	0	30-May	2016	30-May	74	52.8	NA	NA	NA	NA	NA	NA	NA	0d - CF	gps	1	5	-14.9465	20.6135	0.049
Dirk1	a	dirk		field	m	2	01-Jun	2016	30-May	111	57.3	NA	NA	32.4	NA	NA	NA	NA		gps	1	5	-14.9465	20.6135	0.049
Dirk1	a	dirk		field	m	7	06-Jun	2016	30-May	253	69.94	NA	NA	42.26	NA	NA	NA	NA		gps	1	5	-14.9465	20.6135	0.049
Dirk1	b	dirk		field	m	16	15-Jun	2016	30-May	620	89.8	NA	NA	62.6	NA	NA	NA	NA		gps	1	5	-15.2485	20.5709	0.0506
Dirk1	b	dirk		field	m	14	13-Jun	2016	30-May	512	84.9	NA	NA	59.6	NA	NA	NA	NA		gps	1	5	-15.2485	20.5709	0.0506
Dirk1	b	dirk		field	m	18	17-Jun	2016	30-May	657	93.8	NA	NA	66.6	NA	NA	NA	NA		gps	1	5	-15.2485	20.5709	0.0506
Dirk1	b	dirk		field	m	11	10-Jun	2016	30-May	387	79.5	NA	NA	53.9	NA	NA	NA	NA		gps	1	5	-15.2485	20.5709	0.0506
Dirk1	c	dirk		field	m	30	29-Jun	2016	30-May	870	108.56	NA	NA	68.89	NA	NA	NA	NA		gps	1	5	-15.5375	20.0056	0.05767
Dirk1	c	dirk		field	m	23	22-Jun	2016	30-May	762	101	NA	NA	68	NA	NA	NA	NA		gps	1	5	-15.5375	20.0056	0.05767
Dirk1	c	dirk		field	m	25	24-Jun	2016	30-May	791	103.77	NA	NA	68.67	NA	NA	NA	NA		gps	1	5	-15.5375	20.0056	0.05767
Dirk1	c	dirk		field	m	28	27-Jun	2016	30-May	838	106.8	NA	NA	68.8	NA	NA	NA	NA	AF.OR (l/u)	gps	1	5	-15.5375	20.0056	0.05767
Dirk1	c	dirk		field	m	21	20-Jun	2016	30-May	750	98.6	NA	NA	68	NA	NA	NA	NA		gps	1	5	-15.5375	20.0056	0.05767
Dirk1	NA	dirk		field	m	37	06-Jul	2016	30-May	852	114.35	NA	NA	69	NA	NA	NA	NA		gps	1	5	NA	NA	NA
Dirk1	NA	dirk		field	m	35	04-Jul	2016	30-May	901	113.6	NA	NA	68.3	NA	NA	NA	NA		gps	1	5	NA	NA	NA
Dirk1	NA	dirk		field	m	32	01-Jul	2016	30-May	893	110.8	NA	NA	69.1	NA	NA	NA	NA		gps	1	5	NA	NA	NA
Dirk2	a	dirk		field	m	4	03-Jun	2016	30-May	158	62.7	NA	NA	33.3	NA	NA	NA	NA		gps	2	5	-14.855	20.9325	0.0461751
Dirk2	a	dirk		field	m	0	30-May	2016	30-May	71	51.6	NA	NA	28.7	NA	NA	NA	NA	0d - CF	gps	2	5	-14.855	20.9325	0.0461751
Dirk2	a	dirk		field	m	2	01-Jun	2016	30-May	114	57.5	NA	NA	31.8	NA	NA	NA	NA		gps	2	5	-14.855	20.9325	0.0461751
Dirk2	a	dirk		field	m	7	06-Jun	2016	30-May	274	69.75	NA	NA	42.55	NA	NA	NA	NA		gps	2	5	-14.855	20.9325	0.0461751
Dirk2	a	dirk		field	m	9	08-Jun	2016	30-May	334	74.3	NA	NA	48.8	NA	NA	NA	NA		gps	2	5	-14.855	20.9325	0.0461751
Dirk2	b	dirk		field	m	16	15-Jun	2016	30-May	597	90.7	NA	NA	60.5	NA	NA	NA	NA		gps	2	5	-15.1439	20.1217	0.0541
Dirk2	b	dirk		field	m	18	17-Jun	2016	30-May	654	94.6	NA	NA	65	NA	NA	NA	NA		gps	2	5	-15.1439	20.1217	0.0541
Dirk2	b	dirk		field	m	14	13-Jun	2016	30-May	554	86.7	NA	NA	60.5	NA	NA	NA	NA		gps	2	5	-15.1439	20.1217	0.0541
Dirk2	b	dirk		field	m	11	10-Jun	2016	30-May	393	80.5	NA	NA	51.8	NA	NA	NA	NA		gps	2	5	-15.1439	20.1217	0.0541
Dirk2	c	dirk		field	m	23	22-Jun	2016	30-May	784	102.9	NA	NA	NA	NA	NA	NA	NA		gps	2	5	-15.0282	21.1386	0.0449
Dirk2	c	dirk		field	m	25	24-Jun	2016	30-May	783	103.67	NA	NA	68.77	NA	NA	NA	NA		gps	2	5	-15.0282	21.1386	0.0449
Dirk2	c	dirk		field	m	21	20-Jun	2016	30-May	760	99.2	NA	NA	67.1	NA	NA	NA	NA		gps	2	5	-15.0282	21.1386	0.0449
Dirk2	c	dirk		field	m	28	27-Jun	2016	30-May	856	106.6	NA	NA	68.1	NA	NA	NA	NA	ABO.K (r/u)	gps	2	5	-15.0282	21.1386	0.0449
Dirk2	c	dirk		field	m	30	29-Jun	2016	30-May	858	108.74	NA	NA	68.7	NA	NA	NA	NA		gps	2	5	-15.0282	21.1386	0.0449
Dirk2	NA	dirk		field	m	35	04-Jul	2016	30-May	868	113.8	NA	NA	69.3	NA	NA	NA	NA		gps	2	5	NA	NA	NA
Dirk2	NA	dirk		field	m	32	01-Jul	2016	30-May	810	111.2	NA	NA	68.6	NA	NA	NA	NA		gps	2	5	NA	NA	NA
Dirk2	NA	dirk		field	m	37	06-Jul	2016	30-May	829	114.29	NA	NA	68.36	NA	NA	NA	NA		gps	2	5	NA	NA	NA
Glenn1	a	glenn		field	m	2	01-Jun	2016	30-May	88	46.7	NA	NA	22.4	NA	NA	NA	NA		gps	1	5	-18.704	17.6545	0.132333
Glenn1	a	glenn		field	m	7	06-Jun	2016	30-May	190	65	NA	NA	38.6	NA	NA	NA	NA		gps	1	5	-18.704	17.6545	0.132333
Glenn1	a	glenn		field	m	4	03-Jun	2016	30-May	124	56.7	NA	NA	28.1	NA	NA	NA	NA		gps	1	5	-18.704	17.6545	0.132333
Glenn1	a	glenn		field	m	9	08-Jun	2016	30-May	285	71.8	NA	NA	44.6	NA	NA	NA	NA		gps	1	5	-18.704	17.6545	0.132333
Glenn1	a	glenn		field	m	0	30-May	2016	30-May	52	49.1	NA	NA	NA	NA	NA	NA	NA	0d - CF	gps	1	5	-18.704	17.6545	0.132333
Glenn1	b	glenn		field	m	16	15-Jun	2016	30-May	553	88.1	NA	NA	56.5	NA	NA	NA	NA		gps	1	5	-19.7001	15.5215	0.253683
Glenn1	b	glenn		field	m	14	13-Jun	2016	30-May	481	83.9	NA	NA	53.8	NA	NA	NA	NA		gps	1	5	-19.7001	15.5215	0.253683
Glenn1	b	glenn		field	m	11	10-Jun	2016	30-May	368	76.5	NA	NA	49.1	NA	NA	NA	NA		gps	1	5	-19.7001	15.5215	0.253683
Glenn1	b	glenn		field	m	18	17-Jun	2016	30-May	559	91	NA	NA	60.9	NA	NA	NA	NA		gps	1	5	-19.7001	15.5215	0.253683
Glenn1	c	glenn		field	m	21	20-Jun	2016	30-May	717	95.1	NA	NA	62.9	NA	NA	NA	NA		gps	1	5	-19.3515	14.3998	0.31856
Glenn1	c	glenn		field	m	25	24-Jun	2016	30-May	724	101.04	NA	NA	65.1	NA	NA	NA	NA		gps	1	5	-19.3515	14.3998	0.31856
Glenn1	c	glenn		field	m	23	22-Jun	2016	30-May	760	98.5	NA	NA	65.3	NA	NA	NA	NA		gps	1	5	-19.3515	14.3998	0.31856
Glenn1	c	glenn		field	m	28	27-Jun	2016	30-May	822	104.2	NA	NA	66.4	NA	NA	NA	NA	A.FOW (l/u)	gps	1	5	-19.3515	14.3998	0.31856
Glenn1	c	glenn		field	m	30	29-Jun	2016	30-May	777	106.58	NA	NA	66.4	NA	NA	NA	NA		gps	1	5	-19.3515	14.3998	0.31856
Glenn1	NA	glenn		field	m	35	04-Jul	2016	30-May	820	111.3	NA	NA	67.8	NA	NA	NA	NA		gps	1	5	NA	NA	NA
Glenn1	NA	glenn		field	m	32	01-Jul	2016	30-May	845	107.7	NA	NA	67.4	NA	NA	NA	NA		gps	1	5	NA	NA	NA
Glenn1	NA	glenn		field	m	37	06-Jul	2016	30-May	780	112.68	NA	NA	69.43	NA	NA	NA	NA		gps	1	5	NA	NA	NA
Inge1	a	inge		field	f	5	10-Jun	2016	05-Jun	102	55.9	NA	NA	32.1	NA	NA	NA	NA		gps	1	11	-17.9957	17.0387	0.147497
Inge1	a	inge		field	f	1	06-Jun	2016	05-Jun	55	46.81	NA	NA	24.27	NA	NA	NA	NA	1d - CF	gps	1	11	-17.9957	17.0387	0.147497
Inge1	a	inge		field	f	10	15-Jun	2016	05-Jun	283	68	NA	NA	40	NA	NA	NA	NA		gps	1	11	-17.9957	17.0387	0.147497
Inge1	a	inge		field	f	8	13-Jun	2016	05-Jun	201	63	NA	NA	36.8	NA	NA	NA	NA		gps	1	11	-17.9957	17.0387	0.147497
Inge1	a	inge		field	f	3	08-Jun	2016	05-Jun	79	51.1	NA	NA	27.6	NA	NA	NA	NA		gps	1	11	-17.9957	17.0387	0.147497
Inge1	b	inge		field	f	19	24-Jun	2016	05-Jun	501	84.23	NA	NA	54.45	NA	NA	NA	NA		gps	1	11	-17.3636	16.6141	0.154747
Inge1	b	inge		field	f	12	17-Jun	2016	05-Jun	290	71.8	NA	NA	44.8	NA	NA	NA	NA		gps	1	11	-17.3636	16.6141	0.154747
Inge1	b	inge		field	f	15	20-Jun	2016	05-Jun	425	75.6	NA	NA	49.9	NA	NA	NA	NA		gps	1	11	-17.3636	16.6141	0.154747
Inge1	b	inge		field	f	17	22-Jun	2016	05-Jun	459	81.1	NA	NA	52.3	NA	NA	NA	NA		gps	1	11	-17.3636	16.6141	0.154747
Inge1	c	inge		field	f	29	04-Jul	2016	05-Jun	654	93.9	NA	NA	58.7	NA	NA	NA	NA	A.ROT (r/u)	gps	1	11	-16.2461	18.1828	0.0927521
Inge1	c	inge		field	f	22	27-Jun	2016	05-Jun	611	87.4	NA	NA	57.3	NA	NA	NA	NA		gps	1	11	-16.2461	18.1828	0.0927521
Inge1	c	inge		field	f	24	29-Jun	2016	05-Jun	572	89.6	NA	NA	57.81	NA	NA	NA	NA		gps	1	11	-16.2461	18.1828	0.0927521
Inge1	c	inge		field	f	26	01-Jul	2016	05-Jun	659	92.7	NA	NA	57.6	NA	NA	NA	NA		gps	1	11	-16.2461	18.1828	0.0927521
Inge1	NA	inge		field	f	33	08-Jul	2016	05-Jun	650	99.2	NA	NA	58	NA	NA	NA	NA		gps	1	11	NA	NA	NA
Inge1	NA	inge		field	f	31	06-Jul	2016	05-Jun	674	97.4	NA	NA	59.49	NA	NA	NA	NA		gps	1	11	NA	NA	NA
Inge2	a	inge		field	f	3	08-Jun	2016	05-Jun	85	53.3	NA	NA	28.9	NA	NA	NA	NA		gps	2	11	-16.3856	18.5574	0.086275
Inge2	a	inge		field	f	8	13-Jun	2016	05-Jun	235	64.2	NA	NA	38	NA	NA	NA	NA		gps	2	11	-16.3856	18.5574	0.086275
Inge2	a	inge		field	f	1	06-Jun	2016	05-Jun	60	46.29	NA	NA	22.94	NA	NA	NA	NA	1d - CF	gps	2	11	-16.3856	18.5574	0.086275
Inge2	a	inge		field	f	5	10-Jun	2016	05-Jun	120	58.1	NA	NA	30.7	NA	NA	NA	NA		gps	2	11	-16.3856	18.5574	0.086275
Inge2	a	inge		field	f	10	15-Jun	2016	05-Jun	321	69.3	NA	NA	41.4	NA	NA	NA	NA		gps	2	11	-16.3856	18.5574	0.086275
Inge2	b	inge		field	f	12	17-Jun	2016	05-Jun	357	73.5	NA	NA	45.6	NA	NA	NA	NA		gps	2	11	-16.7262	17.9138	0.102346
Inge2	b	inge		field	f	19	24-Jun	2016	05-Jun	539	86.48	NA	NA	54.76	NA	NA	NA	NA		gps	2	11	-16.7262	17.9138	0.102346
Inge2	b	inge		field	f	17	22-Jun	2016	05-Jun	517	84.1	NA	NA	52.9	NA	NA	NA	NA		gps	2	11	-16.7262	17.9138	0.102346
Inge2	b	inge		field	f	15	20-Jun	2016	05-Jun	475	80.2	NA	NA	49.7	NA	NA	NA	NA		gps	2	11	-16.7262	17.9138	0.102346
Inge2	c	inge		field	f	22	27-Jun	2016	05-Jun	650	90.8	NA	NA	56	NA	NA	NA	NA		gps	2	11	-16.2518	17.6545	0.105376
Inge2	c	inge		field	f	26	01-Jul	2016	05-Jun	636	95.3	NA	NA	56.6	NA	NA	NA	NA		gps	2	11	-16.2518	17.6545	0.105376
Inge2	c	inge		field	f	29	04-Jul	2016	05-Jun	697	97.3	NA	NA	57.8	NA	NA	NA	NA	ASO.G (l/u)	gps	2	11	-16.2518	17.6545	0.105376
Inge2	c	inge		field	f	24	29-Jun	2016	05-Jun	654	93.14	NA	NA	57.24	NA	NA	NA	NA		gps	2	11	-16.2518	17.6545	0.105376
Inge2	NA	inge		field	f	31	06-Jul	2016	05-Jun	705	99.22	NA	NA	58.3	NA	NA	NA	NA		gps	2	11	NA	NA	NA
Inge2	NA	inge		field	f	33	08-Jul	2016	05-Jun	671	101.2	NA	NA	56.9	NA	NA	NA	NA		gps	2	11	NA	NA	NA
Jeroen1	a	jeroen	lena	field	m	9	10-Jun	2016	01-Jun	152	63.2	NA	NA	36.1	NA	NA	NA	NA		gps	1	7	-19.9139	14.618	0.318076
Jeroen1	a	jeroen	lena	field	m	5	06-Jun	2016	01-Jun	77	52.9	NA	NA	31.6	NA	NA	NA	NA		gps	1	7	-19.9139	14.618	0.318076
Jeroen1	a	jeroen	lena	field	m	0	01-Jun	2016	01-Jun	50	49	NA	NA	24.8	NA	NA	NA	NA	0d - CF	gps	1	7	-19.9139	14.618	0.318076
Jeroen1	a	jeroen	lena	field	m	7	08-Jun	2016	01-Jun	121	57.8	NA	NA	33.4	NA	NA	NA	NA		gps	1	7	-19.9139	14.618	0.318076
Jeroen1	a	jeroen	lena	field	m	2	03-Jun	2016	01-Jun	60	51.24	NA	NA	27.7	NA	NA	NA	NA		gps	1	7	-19.9139	14.618	0.318076
Jeroen1	b	jeroen	lena	field	m	12	13-Jun	2016	01-Jun	248	69.5	NA	NA	41.7	NA	NA	NA	NA		gps	1	7	-22.34	10.8948	0.60839
Jeroen1	b	jeroen	lena	field	m	16	17-Jun	2016	01-Jun	NA	72.8	NA	NA	48.9	NA	NA	NA	NA		gps	1	7	-22.34	10.8948	0.60839
Jeroen1	b	jeroen	lena	field	m	19	20-Jun	2016	01-Jun	460	81.1	NA	NA	51.7	NA	NA	NA	NA		gps	1	7	-22.34	10.8948	0.60839
Jeroen1	b	jeroen	lena	field	m	14	15-Jun	2016	01-Jun	294	72.7	NA	NA	44.8	NA	NA	NA	NA		gps	1	7	-22.34	10.8948	0.60839
Jeroen1	c	jeroen	lena	field	m	30	01-Jul	2016	01-Jun	639	94.3	NA	NA	NA	NA	NA	NA	NA		gps	1	7	-22.0806	11.7397	0.54578
Jeroen1	c	jeroen	lena	field	m	21	22-Jun	2016	01-Jun	482	84.9	NA	NA	56.8	NA	NA	NA	NA		gps	1	7	-22.0806	11.7397	0.54578
Jeroen1	c	jeroen	lena	field	m	23	24-Jun	2016	01-Jun	573	87.92	NA	NA	57.33	NA	NA	NA	NA		gps	1	7	-22.0806	11.7397	0.54578
Jeroen1	c	jeroen	lena	field	m	28	29-Jun	2016	01-Jun	596	93.16	NA	NA	59.97	NA	NA	NA	NA	A.SOD (l/u)	gps	1	7	-22.0806	11.7397	0.54578
Jeroen1	c	jeroen	lena	field	m	26	27-Jun	2016	01-Jun	510	91.2	NA	NA	58.7	NA	NA	NA	NA		gps	1	7	-22.0806	11.7397	0.54578
Jeroen1	NA	jeroen	lena	field	m	33	04-Jul	2016	01-Jun	651	98	NA	NA	61.1	NA	NA	NA	NA		gps	1	7	NA	NA	NA
Jeroen2	a	jeroen	lena	field	m	9	10-Jun	2016	01-Jun	223	67.5	NA	NA	40.4	NA	NA	NA	NA		gps	2	7	-18.5918	16.0173	0.20455
Jeroen2	a	jeroen	lena	field	m	7	08-Jun	2016	01-Jun	184	61.4	NA	NA	36.6	NA	NA	NA	NA		gps	2	7	-18.5918	16.0173	0.20455
Jeroen2	a	jeroen	lena	field	m	0	01-Jun	2016	01-Jun	55	49.1	NA	NA	27.6	NA	NA	NA	NA	0d - CF	gps	2	7	-18.5918	16.0173	0.20455
Jeroen2	a	jeroen	lena	field	m	5	06-Jun	2016	01-Jun	121	56.1	NA	NA	31.7	NA	NA	NA	NA		gps	2	7	-18.5918	16.0173	0.20455
Jeroen2	a	jeroen	lena	field	m	2	03-Jun	2016	01-Jun	63	51.47	NA	NA	29.04	NA	NA	NA	NA		gps	2	7	-18.5918	16.0173	0.20455
Jeroen2	b	jeroen	lena	field	m	19	20-Jun	2016	01-Jun	600	87.4	NA	NA	59.2	NA	NA	NA	NA		gps	2	7	-22.0201	13.153	0.454444
Jeroen2	b	jeroen	lena	field	m	12	13-Jun	2016	01-Jun	294	74.1	NA	NA	49.7	NA	NA	NA	NA		gps	2	7	-22.0201	13.153	0.454444
Jeroen2	b	jeroen	lena	field	m	16	17-Jun	2016	01-Jun	NA	82.6	NA	NA	57.3	NA	NA	NA	NA		gps	2	7	-22.0201	13.153	0.454444
Jeroen2	b	jeroen	lena	field	m	14	15-Jun	2016	01-Jun	436	78.2	NA	NA	52.4	NA	NA	NA	NA		gps	2	7	-22.0201	13.153	0.454444
Jeroen2	c	jeroen	lena	field	m	23	24-Jun	2016	01-Jun	689	93.82	NA	NA	65.33	NA	NA	NA	NA		gps	2	7	-22.2701	11.5907	0.5595
Jeroen2	c	jeroen	lena	field	m	28	29-Jun	2016	01-Jun	711	99.66	NA	NA	66.36	NA	NA	NA	NA	ARO.K (r/u)	gps	2	7	-22.2701	11.5907	0.5595
Jeroen2	c	jeroen	lena	field	m	30	01-Jul	2016	01-Jun	898	102	NA	NA	65.7	NA	NA	NA	NA		gps	2	7	-22.2701	11.5907	0.5595
Jeroen2	c	jeroen	lena	field	m	21	22-Jun	2016	01-Jun	631	91.3	NA	NA	62.1	NA	NA	NA	NA		gps	2	7	-22.2701	11.5907	0.5595
Jeroen2	c	jeroen	lena	field	m	26	27-Jun	2016	01-Jun	684	98	NA	NA	65.7	NA	NA	NA	NA		gps	2	7	-22.2701	11.5907	0.5595
Jeroen2	NA	jeroen	lena	field	m	33	04-Jul	2016	01-Jun	774	104.8	NA	NA	64.7	NA	NA	NA	NA		gps	2	7	NA	NA	NA
John2	a	john		field	m	1	10-Jun	2016	09-Jun	58	47	NA	NA	25	NA	NA	NA	NA	1d - CF	gps	2	15	NA	NA	NA
John2	a	john		field	m	4	13-Jun	2016	09-Jun	67	54.7	NA	NA	28.7	NA	NA	NA	NA		gps	2	15	NA	NA	NA
John2	a	john		field	m	6	15-Jun	2016	09-Jun	75	56.6	NA	NA	31	NA	NA	NA	NA		gps	2	15	NA	NA	NA
John2	a	john		field	m	8	17-Jun	2016	09-Jun	76	57.6	NA	NA	31.2	NA	NA	NA	NA	aangepikt	gps	2	15	NA	NA	NA
John2	b	john		field	m	18	27-Jun	2016	09-Jun	262	71	NA	NA	38.6	NA	NA	NA	NA		gps	2	15	NA	NA	NA
John2	b	john		field	m	20	29-Jun	2016	09-Jun	283	75.38	NA	NA	42.64	NA	NA	NA	NA		gps	2	15	NA	NA	NA
John2	b	john		field	m	15	24-Jun	2016	09-Jun	170	66.19	NA	NA	36.02	NA	NA	NA	NA		gps	2	15	NA	NA	NA
John2	c	john		field	m	25	04-Jul	2016	09-Jun	384	83.5	NA	NA	49.4	NA	NA	NA	NA		gps	2	15	NA	NA	NA
John2	c	john		field	m	22	01-Jul	2016	09-Jun	370	79.6	NA	NA	45.8	NA	NA	NA	NA		gps	2	15	NA	NA	NA
John2	c	john		field	m	27	06-Jul	2016	09-Jun	536	86.28	NA	NA	52.57	NA	NA	NA	NA		gps	2	15	NA	NA	NA
John2	c	john		field	m	29	08-Jul	2016	09-Jun	451	89	NA	NA	54.7	NA	NA	NA	NA		gps	2	15	NA	NA	NA
John2	NA	john		field	m	34	13-Jul	2016	09-Jun	530	92.64	NA	NA	56.43	NA	NA	NA	NA		gps	2	15	NA	NA	NA
Kristof1	a	kristof		field	m	0	10-Jun	2016	10-Jun	62	47.3	NA	NA	24.7	NA	NA	NA	NA	0d - CF	gps	2	16	NA	NA	NA
Kristof1	a	kristof		field	m	3	13-Jun	2016	10-Jun	69	52.1	NA	NA	29.2	NA	NA	NA	NA		gps	2	16	NA	NA	NA
Kristof1	a	kristof		field	m	5	15-Jun	2016	10-Jun	84	54.4	NA	NA	29.5	NA	NA	NA	NA		gps	2	16	NA	NA	NA
Kristof1	a	kristof		field	m	7	17-Jun	2016	10-Jun	122	58.8	NA	NA	31	NA	NA	NA	NA		gps	2	16	NA	NA	NA
Kristof1	a	kristof		field	m	10	20-Jun	2016	10-Jun	190	63.1	NA	NA	35.4	NA	NA	NA	NA		gps	2	16	NA	NA	NA
Kristof1	b	kristof		field	m	12	22-Jun	2016	10-Jun	253	70.1	NA	NA	39.8	NA	NA	NA	NA		gps	2	16	NA	NA	NA
Kristof1	b	kristof		field	m	17	27-Jun	2016	10-Jun	401	79.4	NA	NA	48.9	NA	NA	NA	NA		gps	2	16	NA	NA	NA
Kristof1	b	kristof		field	m	14	24-Jun	2016	10-Jun	342	74.43	NA	NA	43.45	NA	NA	NA	NA		gps	2	16	NA	NA	NA
Kristof1	b	kristof		field	m	19	29-Jun	2016	10-Jun	445	82.97	NA	NA	52.68	NA	NA	NA	NA		gps	2	16	NA	NA	NA
Kristof1	c	kristof		field	m	28	08-Jul	2016	10-Jun	664	95.2	NA	NA	61.3	NA	NA	NA	NA		gps	2	16	NA	NA	NA
Kristof1	c	kristof		field	m	24	04-Jul	2016	10-Jun	586	89.4	NA	NA	57.8	NA	NA	NA	NA		gps	2	16	NA	NA	NA
Kristof1	c	kristof		field	m	26	06-Jul	2016	10-Jun	592	92.46	NA	NA	59.13	NA	NA	NA	NA		gps	2	16	NA	NA	NA
Kristof1	c	kristof		field	m	21	01-Jul	2016	10-Jun	648	86	NA	NA	53.2	NA	NA	NA	NA		gps	2	16	NA	NA	NA
Kristof1	NA	kristof		field	m	33	13-Jul	2016	10-Jun	755	101.59	NA	NA	66.12	NA	NA	NA	NA	AR.OU (r/u)	gps	2	16	NA	NA	NA
Kristof2	a	kristof		field	m	6	15-Jun	2016	09-Jun	100	50.9	NA	NA	31.1	NA	NA	NA	NA		gps	1	15	-21.0482	15.0043	0.30997
Kristof2	a	kristof		field	m	4	13-Jun	2016	09-Jun	85	51.9	NA	NA	27.5	NA	NA	NA	NA		gps	1	15	-21.0482	15.0043	0.30997
Kristof2	a	kristof		field	m	1	10-Jun	2016	09-Jun	53	46.7	NA	NA	26	NA	NA	NA	NA	1d - CF	gps	1	15	-21.0482	15.0043	0.30997
Kristof2	a	kristof		field	m	8	17-Jun	2016	09-Jun	152	60.8	NA	NA	34.5	NA	NA	NA	NA		gps	1	15	-21.0482	15.0043	0.30997
Kristof2	b	kristof		field	m	13	22-Jun	2016	09-Jun	310	70.9	NA	NA	41.8	NA	NA	NA	NA		gps	1	15	-20.3681	15.3646	0.274756
Kristof2	b	kristof		field	m	20	29-Jun	2016	09-Jun	472	82.75	NA	NA	51.86	NA	NA	NA	NA		gps	1	15	-20.3681	15.3646	0.274756
Kristof2	b	kristof		field	m	15	24-Jun	2016	09-Jun	371	75.3	NA	NA	44.9	NA	NA	NA	NA		gps	1	15	-20.3681	15.3646	0.274756
Kristof2	b	kristof		field	m	18	27-Jun	2016	09-Jun	436	79.5	NA	NA	51.1	NA	NA	NA	NA		gps	1	15	-20.3681	15.3646	0.274756
Kristof2	b	kristof		field	m	11	20-Jun	2016	09-Jun	235	65.7	NA	NA	37.6	NA	NA	NA	NA		gps	1	15	-20.3681	15.3646	0.274756
Kristof2	c	kristof		field	m	25	04-Jul	2016	09-Jun	617	88.5	NA	NA	NA	NA	NA	NA	NA		gps	1	15	-17.6389	18.2892	0.103327
Kristof2	c	kristof		field	m	22	01-Jul	2016	09-Jun	603	NA	NA	NA	57.8	NA	NA	NA	NA		gps	1	15	-17.6389	18.2892	0.103327
Kristof2	c	kristof		field	m	29	08-Jul	2016	09-Jun	655	95.4	NA	NA	58.3	NA	NA	NA	NA		gps	1	15	-17.6389	18.2892	0.103327
Kristof2	c	kristof		field	m	27	06-Jul	2016	09-Jun	646	92.47	NA	NA	60.13	NA	NA	NA	NA		gps	1	15	-17.6389	18.2892	0.103327
Kristof2	NA	kristof		field	m	34	13-Jul	2016	09-Jun	778	101.24	NA	NA	62.5	NA	NA	NA	NA	A.WOL (r/u)	gps	1	15	NA	NA	NA
L1-1	a	L1		field	NA	1	17-Jun	2016	16-Jun	58	48	NA	NA	25	NA	NA	NA	NA	1d - eigen	lissa	1	22	NA	NA	NA
L1-1	a	L1		field	NA	8	24-Jun	2016	16-Jun	178	59.74	NA	NA	34.87	NA	NA	NA	NA		lissa	1	22	NA	NA	NA
L1-1	a	L1		field	NA	6	22-Jun	2016	16-Jun	113	55.1	NA	NA	30.3	NA	NA	NA	NA		lissa	1	22	NA	NA	NA
L1-1	a	L1		field	NA	4	20-Jun	2016	16-Jun	85	52.3	NA	NA	33	NA	NA	NA	NA		lissa	1	22	NA	NA	NA
L1-1	b	L1		field	NA	20	06-Jul	2016	16-Jun	394	78.11	NA	NA	48.8	NA	NA	NA	NA		lissa	1	22	NA	NA	NA
L1-1	b	L1		field	NA	15	01-Jul	2016	16-Jun	262	72.8	NA	NA	45.9	NA	NA	NA	NA		lissa	1	22	NA	NA	NA
L1-1	b	L1		field	NA	11	27-Jun	2016	16-Jun	192	66.4	NA	NA	40.5	NA	NA	NA	NA		lissa	1	22	NA	NA	NA
L1-1	b	L1		field	NA	13	29-Jun	2016	16-Jun	213	69.6	NA	NA	44.63	NA	NA	NA	NA		lissa	1	22	NA	NA	NA
L1-1	b	L1		field	NA	18	04-Jul	2016	16-Jun	315	75.9	NA	NA	47.4	NA	NA	NA	NA		lissa	1	22	NA	NA	NA
L1-1	c	L1		field	NA	22	08-Jul	2016	16-Jun	375	81.1	NA	NA	51.6	NA	NA	NA	NA		lissa	1	22	NA	NA	NA
L1-1	c	L1		field	NA	27	13-Jul	2016	16-Jun	408	85.62	NA	NA	55.1	NA	NA	NA	NA		lissa	1	22	NA	NA	NA
L1-2	a	L1		field	NA	8	24-Jun	2016	16-Jun	209	64.23	NA	NA	38.87	NA	NA	NA	NA		lissa	2	22	-18.9939	17.4132	0.143747
L1-2	a	L1		field	NA	1	17-Jun	2016	16-Jun	59	49.9	NA	NA	29.5	NA	NA	NA	NA	1d - eigen	lissa	2	22	-18.9939	17.4132	0.143747
L1-2	a	L1		field	NA	6	22-Jun	2016	16-Jun	133	59.9	NA	NA	34.6	NA	NA	NA	NA		lissa	2	22	-18.9939	17.4132	0.143747
L1-2	a	L1		field	NA	4	20-Jun	2016	16-Jun	98	54.7	NA	NA	32.7	NA	NA	NA	NA		lissa	2	22	-18.9939	17.4132	0.143747
L1-2	b	L1		field	NA	18	04-Jul	2016	16-Jun	436	83.2	NA	NA	49.1	NA	NA	NA	NA		lissa	2	22	-18.4142	17.7378	0.125774
L1-2	b	L1		field	NA	11	27-Jun	2016	16-Jun	263	71.7	NA	NA	45.1	NA	NA	NA	NA		lissa	2	22	-18.4142	17.7378	0.125774
L1-2	b	L1		field	NA	13	29-Jun	2016	16-Jun	325	76.33	NA	NA	50.01	NA	NA	NA	NA		lissa	2	22	-18.4142	17.7378	0.125774
L1-2	b	L1		field	NA	20	06-Jul	2016	16-Jun	525	85.76	NA	NA	55.38	NA	NA	NA	NA		lissa	2	22	-18.4142	17.7378	0.125774
L1-2	b	L1		field	NA	15	01-Jul	2016	16-Jun	353	80.4	NA	NA	50.3	NA	NA	NA	NA		lissa	2	22	-18.4142	17.7378	0.125774
L1-2	c	L1		field	NA	27	13-Jul	2016	16-Jun	574	95.24	NA	NA	61.67	NA	NA	NA	NA	AX.OX (r/u)	lissa	2	22	-18.7816	17.3053	0.147317
L1-2	c	L1		field	NA	22	08-Jul	2016	16-Jun	555	89.4	NA	NA	59.2	NA	NA	NA	NA		lissa	2	22	-18.7816	17.3053	0.147317
L1-3	a	L1		field	NA	4	20-Jun	2016	16-Jun	69	48.3	NA	NA	NA	NA	NA	NA	NA		lissa	3	22	NA	NA	NA
L1-3	a	L1		field	NA	6	22-Jun	2016	16-Jun	80	51.5	NA	NA	26.7	NA	NA	NA	NA		lissa	3	22	NA	NA	NA
L1-3	a	L1		field	NA	8	24-Jun	2016	16-Jun	129	55.8	NA	NA	30.8	NA	NA	NA	NA		lissa	3	22	NA	NA	NA
L1-3	b	L1		field	NA	11	27-Jun	2016	16-Jun	133	60.9	NA	NA	36.5	NA	NA	NA	NA		lissa	3	22	NA	NA	NA
L1-3	b	L1		field	NA	13	29-Jun	2016	16-Jun	153	64.81	NA	NA	37.35	NA	NA	NA	NA		lissa	3	22	NA	NA	NA
L1-3	b	L1		field	NA	15	01-Jul	2016	16-Jun	191	68.1	NA	NA	NA	NA	NA	NA	NA		lissa	3	22	NA	NA	NA
L1-3	b	L1		field	NA	20	06-Jul	2016	16-Jun	246	72.48	NA	NA	42.28	NA	NA	NA	NA		lissa	3	22	NA	NA	NA
L1-3	b	L1		field	NA	18	04-Jul	2016	16-Jun	217	69.8	NA	NA	40.2	NA	NA	NA	NA		lissa	3	22	NA	NA	NA
L1-3	c	L1		field	NA	22	08-Jul	2016	16-Jun	296	75	NA	NA	44.6	NA	NA	NA	NA		lissa	3	22	NA	NA	NA
L1-3	c	L1		field	NA	27	13-Jul	2016	16-Jun	367	81.35	NA	NA	48.37	NA	NA	NA	NA		lissa	3	22	NA	NA	NA
L10-1	a	L10		field	NA	2	13-Jun	2016	11-Jun	56	47.5	NA	NA	26.5	NA	NA	NA	NA	2d - eigen	lissa	1	17	-17.2122	19.5734	0.0720863
L10-1	a	L10		field	NA	4	15-Jun	2016	11-Jun	84	51.1	NA	NA	27.1	NA	NA	NA	NA		lissa	3	17	-17.2122	19.5734	0.0720863
L10-1	a	L10		field	NA	6	17-Jun	2016	11-Jun	116	56.5	NA	NA	33	NA	NA	NA	NA		lissa	3	17	-17.2122	19.5734	0.0720863
L10-1	b	L10		field	NA	20	01-Jul	2016	11-Jun	510	84.2	NA	NA	56.5	NA	NA	NA	NA		lissa	3	17	-16.1872	19.4931	0.067921
L10-1	b	L10		field	NA	11	22-Jun	2016	11-Jun	225	67	NA	NA	42.4	NA	NA	NA	NA		lissa	3	17	-16.1872	19.4931	0.067921
L10-1	b	L10		field	NA	16	27-Jun	2016	11-Jun	358	76.9	NA	NA	50.1	NA	NA	NA	NA		lissa	3	17	-16.1872	19.4931	0.067921
L10-1	b	L10		field	NA	13	24-Jun	2016	11-Jun	255	70.55	NA	NA	43.03	NA	NA	NA	NA		lissa	3	17	-16.1872	19.4931	0.067921
L10-1	c	L10		field	NA	23	04-Jul	2016	11-Jun	640	88	NA	NA	57.1	NA	NA	NA	NA		lissa	3	17	-15.572	19.5368	0.0639039
L10-1	c	L10		field	NA	25	06-Jul	2016	11-Jun	676	92.84	NA	NA	61.34	NA	NA	NA	NA		lissa	3	17	-15.572	19.5368	0.0639039
L10-1	c	L10		field	NA	27	08-Jul	2016	11-Jun	715	96.2	NA	NA	59.4	NA	NA	NA	NA		lissa	3	17	-15.572	19.5368	0.0639039
L10-1	NA	L10		field	NA	32	13-Jul	2016	11-Jun	NA	100.97	NA	NA	60.84	NA	NA	NA	NA		lissa	3	17	NA	NA	NA
L10-2	a	L10		field	NA	6	15-Jun	2016	09-Jun	101	55.6	NA	NA	32	NA	NA	NA	NA		lissa	1	15	-17.2867	19.0771	0.082707
L10-2	a	L10		field	NA	4	13-Jun	2016	09-Jun	84	51.1	NA	NA	28.5	NA	NA	NA	NA		lissa	1	15	-17.2867	19.0771	0.082707
L10-2	a	L10		field	NA	8	17-Jun	2016	09-Jun	121	57.3	NA	NA	35.4	NA	NA	NA	NA		lissa	1	15	-17.2867	19.0771	0.082707
L10-2	a	L10		field	NA	1	10-Jun	2016	09-Jun	55	44.1	NA	NA	23.3	NA	NA	NA	NA	1d - eigen	lissa	1	15	-17.2867	19.0771	0.082707
L10-2	b	L10		field	NA	15	24-Jun	2016	09-Jun	292	71.64	NA	NA	45.76	NA	NA	NA	NA		lissa	1	15	-16.7336	18.8169	0.0834178
L10-2	b	L10		field	NA	18	27-Jun	2016	09-Jun	363	76.2	NA	NA	51.8	NA	NA	NA	NA		lissa	1	15	-16.7336	18.8169	0.0834178
L10-2	b	L10		field	NA	11	20-Jun	2016	09-Jun	455	81	NA	NA	54.2	NA	NA	NA	NA		lissa	1	15	-16.7336	18.8169	0.0834178
L10-2	b	L10		field	NA	13	22-Jun	2016	09-Jun	258	67.7	NA	NA	41	NA	NA	NA	NA		lissa	1	15	-16.7336	18.8169	0.0834178
L10-2	c	L10		field	NA	22	01-Jul	2016	09-Jun	510	83.2	NA	NA	56.2	NA	NA	NA	NA		lissa	1	15	-15.9342	19.3835	0.0677929
L10-2	c	L10		field	NA	29	08-Jul	2016	09-Jun	700	93.5	NA	NA	58.8	NA	NA	NA	NA		lissa	1	15	-15.9342	19.3835	0.0677929
L10-2	c	L10		field	NA	25	04-Jul	2016	09-Jun	478	86.8	NA	NA	57.7	NA	NA	NA	NA		lissa	1	15	-15.9342	19.3835	0.0677929
L10-2	c	L10		field	NA	27	06-Jul	2016	09-Jun	654	91.15	NA	NA	60.05	NA	NA	NA	NA		lissa	1	15	-15.9342	19.3835	0.0677929
L10-2	NA	L10		field	NA	34	13-Jul	2016	09-Jun	722	99.27	NA	NA	59.18	NA	NA	NA	NA	AWO.G (r/u)	lissa	1	15	NA	NA	NA
L10-3	a	L10		field	NA	6	15-Jun	2016	09-Jun	47	46.3	NA	NA	25.4	NA	NA	NA	NA		lissa	2	15	NA	NA	NA
L10-3	a	L10		field	NA	8	17-Jun	2016	09-Jun	65	50	NA	NA	25.7	NA	NA	NA	NA		lissa	2	15	NA	NA	NA
L10-3	b	L10		field	NA	11	20-Jun	2016	09-Jun	406	78.7	NA	NA	50.5	NA	NA	NA	NA		lissa	2	15	NA	NA	NA
L11-1	a	L11		field	NA	4	10-Jun	2016	06-Jun	110	56	NA	NA	30	NA	NA	NA	NA		lissa	2	12	-15.8442	18.297	0.0868098
L11-1	a	L11		field	NA	9	15-Jun	2016	06-Jun	260	67.9	NA	NA	43.6	NA	NA	NA	NA		lissa	2	12	-15.8442	18.297	0.0868098
L11-1	a	L11		field	NA	2	08-Jun	2016	06-Jun	70	51.1	NA	NA	26.6	NA	NA	NA	NA		lissa	2	12	-15.8442	18.297	0.0868098
L11-1	a	L11		field	NA	0	06-Jun	2016	06-Jun	53	46.3	NA	NA	25.2	NA	NA	NA	NA	0d - eigen	lissa	2	12	-15.8442	18.297	0.0868098
L11-1	a	L11		field	NA	7	13-Jun	2016	06-Jun	199	62.6	NA	NA	40.1	NA	NA	NA	NA		lissa	2	12	-15.8442	18.297	0.0868098
L11-1	b	L11		field	NA	11	17-Jun	2016	06-Jun	301	71.1	NA	NA	48.4	NA	NA	NA	NA		lissa	2	12	-16.2934	18.1209	0.0944496
L11-1	b	L11		field	NA	14	20-Jun	2016	06-Jun	372	77.2	NA	NA	51.8	NA	NA	NA	NA		lissa	2	12	-16.2934	18.1209	0.0944496
L11-1	b	L11		field	NA	18	24-Jun	2016	06-Jun	526	84.29	NA	NA	54.28	NA	NA	NA	NA		lissa	2	12	-16.2934	18.1209	0.0944496
L11-1	b	L11		field	NA	16	22-Jun	2016	06-Jun	492	81.4	NA	NA	53.3	NA	NA	NA	NA		lissa	2	12	-16.2934	18.1209	0.0944496
L11-1	c	L11		field	NA	25	01-Jul	2016	06-Jun	645	93.6	NA	NA	56.2	NA	NA	NA	NA		lissa	2	12	-15.5983	18.0236	0.0891331
L11-1	c	L11		field	NA	30	06-Jul	2016	06-Jun	667	97.86	NA	NA	58.11	NA	NA	NA	NA		lissa	2	12	-15.5983	18.0236	0.0891331
L11-1	c	L11		field	NA	21	27-Jun	2016	06-Jun	606	87.5	NA	NA	58.1	NA	NA	NA	NA		lissa	2	12	-15.5983	18.0236	0.0891331
L11-1	c	L11		field	NA	28	04-Jul	2016	06-Jun	650	95.6	NA	NA	57.3	NA	NA	NA	NA		lissa	2	12	-15.5983	18.0236	0.0891331
L11-1	c	L11		field	NA	23	29-Jun	2016	06-Jun	610	90.55	NA	NA	57.96	NA	NA	NA	NA		lissa	2	12	-15.5983	18.0236	0.0891331
L11-1	NA	L11		field	NA	32	08-Jul	2016	06-Jun	537	98.7	NA	NA	58.2	NA	NA	NA	NA		lissa	2	12	NA	NA	NA
L11-2	a	L11		field	NA	1	06-Jun	2016	05-Jun	59	48.2	NA	NA	27	NA	NA	NA	NA	1d - eigen	lissa	1	11	-15.2829	18.6003	0.0759652
L11-2	a	L11		field	NA	3	08-Jun	2016	05-Jun	87	53.3	NA	NA	29.6	NA	NA	NA	NA		lissa	1	11	-15.2829	18.6003	0.0759652
L11-2	a	L11		field	NA	8	13-Jun	2016	05-Jun	222	66.4	NA	NA	40.7	NA	NA	NA	NA		lissa	1	11	-15.2829	18.6003	0.0759652
L11-2	a	L11		field	NA	10	15-Jun	2016	05-Jun	275	71.4	NA	NA	44.9	NA	NA	NA	NA		lissa	1	11	-15.2829	18.6003	0.0759652
L11-2	a	L11		field	NA	5	10-Jun	2016	05-Jun	125	58.9	NA	NA	34.2	NA	NA	NA	NA		lissa	1	11	-15.2829	18.6003	0.0759652
L11-2	b	L11		field	NA	12	17-Jun	2016	05-Jun	319	76.2	NA	NA	51.2	NA	NA	NA	NA		lissa	1	11	-15.8312	18.3653	0.0851
L11-2	b	L11		field	NA	17	22-Jun	2016	05-Jun	493	85	NA	NA	51.5	NA	NA	NA	NA		lissa	1	11	-15.8312	18.3653	0.0851
L11-2	b	L11		field	NA	19	24-Jun	2016	05-Jun	500	87.42	NA	NA	57.6	NA	NA	NA	NA		lissa	1	11	-15.8312	18.3653	0.0851
L11-2	b	L11		field	NA	15	20-Jun	2016	05-Jun	428	78.2	NA	NA	51.7	NA	NA	NA	NA		lissa	1	11	-15.8312	18.3653	0.0851
L11-2	c	L11		field	NA	29	04-Jul	2016	05-Jun	570	96.9	NA	NA	58.2	NA	NA	NA	NA		lissa	1	11	-16.5402	17.4699	0.1129
L11-2	c	L11		field	NA	26	01-Jul	2016	05-Jun	579	95	NA	NA	58.8	NA	NA	NA	NA		lissa	1	11	-16.5402	17.4699	0.1129
L11-2	c	L11		field	NA	24	29-Jun	2016	05-Jun	593	92.38	NA	NA	57.42	NA	NA	NA	NA		lissa	1	11	-16.5402	17.4699	0.1129
L11-2	c	L11		field	NA	22	27-Jun	2016	05-Jun	581	90	NA	NA	58.6	NA	NA	NA	NA		lissa	1	11	-16.5402	17.4699	0.1129
L11-2	NA	L11		field	NA	38	13-Jul	2016	05-Jun	563	101.73	NA	NA	58.15	NA	NA	NA	NA	AMO.V (l/u)	lissa	1	11	NA	NA	NA
L11-2	NA	L11		field	NA	31	06-Jul	2016	05-Jun	612	97.69	NA	NA	59.24	NA	NA	NA	NA		lissa	1	11	NA	NA	NA
L11-2	NA	L11		field	NA	33	08-Jul	2016	05-Jun	577	98.8	NA	NA	59.5	NA	NA	NA	NA		lissa	1	11	NA	NA	NA
L11-3	a	L11		field	NA	9	17-Jun	2016	08-Jun	225	68.8	NA	NA	43.2	NA	NA	NA	NA		lissa	3	14	-15.3959	18.8888	0.0721917
L11-3	a	L11		field	NA	2	10-Jun	2016	08-Jun	65	49.9	NA	NA	28.3	NA	NA	NA	NA		lissa	3	14	-15.3959	18.8888	0.0721917
L11-3	a	L11		field	NA	0	08-Jun	2016	08-Jun	52	46.5	NA	NA	25.9	NA	NA	NA	NA	0d - eigen	lissa	3	14	-15.3959	18.8888	0.0721917
L11-3	a	L11		field	NA	5	13-Jun	2016	08-Jun	136	57.6	NA	NA	33.6	NA	NA	NA	NA		lissa	3	14	-15.3959	18.8888	0.0721917
L11-3	a	L11		field	NA	7	15-Jun	2016	08-Jun	192	63.5	NA	NA	38.8	NA	NA	NA	NA		lissa	3	14	-15.3959	18.8888	0.0721917
L11-3	b	L11		field	NA	19	27-Jun	2016	08-Jun	483	85.3	NA	NA	56.4	NA	NA	NA	NA		lissa	3	14	-16.0682	17.9231	0.0957811
L11-3	b	L11		field	NA	16	24-Jun	2016	08-Jun	387	81.16	NA	NA	54.86	NA	NA	NA	NA		lissa	3	14	-16.0682	17.9231	0.0957811
L11-3	b	L11		field	NA	14	22-Jun	2016	08-Jun	397	79.7	NA	NA	51.9	NA	NA	NA	NA		lissa	3	14	-16.0682	17.9231	0.0957811
L11-3	b	L11		field	NA	12	20-Jun	2016	08-Jun	326	73.8	NA	NA	48.8	NA	NA	NA	NA		lissa	3	14	-16.0682	17.9231	0.0957811
L11-3	c	L11		field	NA	28	06-Jul	2016	08-Jun	682	98.48	NA	NA	63.73	NA	NA	NA	NA		lissa	3	14	-17	17.2554	0.125141
L11-3	c	L11		field	NA	26	04-Jul	2016	08-Jun	644	96	NA	NA	64	NA	NA	NA	NA		lissa	3	14	-17	17.2554	0.125141
L11-3	c	L11		field	NA	23	01-Jul	2016	08-Jun	633	92.5	NA	NA	60.4	NA	NA	NA	NA		lissa	3	14	-17	17.2554	0.125141
L11-3	c	L11		field	NA	21	29-Jun	2016	08-Jun	532	90.01	NA	NA	59.55	NA	NA	NA	NA		lissa	3	14	-17	17.2554	0.125141
L11-3	c	L11		field	NA	30	08-Jul	2016	08-Jun	693	101.6	NA	NA	62.7	NA	NA	NA	NA		lissa	3	14	-17	17.2554	0.125141
L11-3	NA	L11		field	NA	35	13-Jul	2016	08-Jun	672	105.61	NA	NA	65.39	NA	NA	NA	NA	AMO.N (l/u)	lissa	3	14	NA	NA	NA
L12-1	a	L12		field	NA	6	10-Jun	2016	04-Jun	156	63.5	NA	NA	37.7	NA	NA	NA	NA		lissa	2	10	-18.1488	16.439	0.175147
L12-1	a	L12		field	NA	9	13-Jun	2016	04-Jun	243	69.1	NA	NA	41.4	NA	NA	NA	NA		lissa	2	10	-18.1488	16.439	0.175147
L12-1	a	L12		field	NA	2	06-Jun	2016	04-Jun	73	51.5	NA	NA	28.6	NA	NA	NA	NA	2d - eigen	lissa	2	10	-18.1488	16.439	0.175147
L12-1	a	L12		field	NA	4	08-Jun	2016	04-Jun	113	58.16	NA	NA	32.67	NA	NA	NA	NA		lissa	2	10	-18.1488	16.439	0.175147
L12-1	b	L12		field	NA	18	22-Jun	2016	04-Jun	504	85.8	NA	NA	51.5	NA	NA	NA	NA		lissa	2	10	-17.6531	17.8471	0.114962
L12-1	b	L12		field	NA	13	17-Jun	2016	04-Jun	300	76.1	NA	NA	47.8	NA	NA	NA	NA		lissa	2	10	-17.6531	17.8471	0.114962
L12-1	b	L12		field	NA	11	15-Jun	2016	04-Jun	284	73.3	NA	NA	44.4	NA	NA	NA	NA		lissa	2	10	-17.6531	17.8471	0.114962
L12-1	b	L12		field	NA	16	20-Jun	2016	04-Jun	453	81.6	NA	NA	52.5	NA	NA	NA	NA		lissa	2	10	-17.6531	17.8471	0.114962
L12-1	b	L12		field	NA	20	24-Jun	2016	04-Jun	558	89.57	NA	NA	59.02	NA	NA	NA	NA		lissa	2	10	-17.6531	17.8471	0.114962
L12-1	c	L12		field	NA	25	29-Jun	2016	04-Jun	767	96.8	NA	NA	63.2	NA	NA	NA	NA		lissa	2	10	-16.019	19.0979	0.07276
L12-1	c	L12		field	NA	30	04-Jul	2016	04-Jun	779	103.2	NA	NA	65.8	NA	NA	NA	NA		lissa	2	10	-16.019	19.0979	0.07276
L12-1	c	L12		field	NA	27	01-Jul	2016	04-Jun	722	100	NA	NA	65.1	NA	NA	NA	NA		lissa	2	10	-16.019	19.0979	0.07276
L12-1	c	L12		field	NA	23	27-Jun	2016	04-Jun	665	93.8	NA	NA	50.6	NA	NA	NA	NA		lissa	2	10	-16.019	19.0979	0.07276
L12-1	NA	L12		field	NA	32	06-Jul	2016	04-Jun	886	106.67	NA	NA	66.37	NA	NA	NA	NA		lissa	2	10	NA	NA	NA
L12-1	NA	L12		field	NA	34	08-Jul	2016	04-Jun	876	108.7	NA	NA	65.8	NA	NA	NA	NA		lissa	2	10	NA	NA	NA
L12-2	a	L12		field	NA	5	08-Jun	2016	03-Jun	136	60.39	NA	NA	35.83	NA	NA	NA	NA		lissa	1	9	-17.5061	17.3566	0.128999
L12-2	a	L12		field	NA	7	10-Jun	2016	03-Jun	182	65.6	NA	NA	38	NA	NA	NA	NA		lissa	1	9	-17.5061	17.3566	0.128999
L12-2	a	L12		field	NA	3	06-Jun	2016	03-Jun	92	54.4	NA	NA	31.7	NA	NA	NA	NA	3d - eigen	lissa	1	9	-17.5061	17.3566	0.128999
L12-2	a	L12		field	NA	10	13-Jun	2016	03-Jun	248	70.3	NA	NA	44.5	NA	NA	NA	NA		lissa	1	9	-17.5061	17.3566	0.128999
L12-2	b	L12		field	NA	17	20-Jun	2016	03-Jun	440	80.6	NA	NA	54	NA	NA	NA	NA		lissa	1	9	-17.9572	17.9488	0.115738
L12-2	b	L12		field	NA	12	15-Jun	2016	03-Jun	240	74.3	NA	NA	46.7	NA	NA	NA	NA		lissa	1	9	-17.9572	17.9488	0.115738
L12-2	b	L12		field	NA	14	17-Jun	2016	03-Jun	260	76.8	NA	NA	48.3	NA	NA	NA	NA		lissa	1	9	-17.9572	17.9488	0.115738
L12-2	b	L12		field	NA	19	22-Jun	2016	03-Jun	466	84.3	NA	NA	52.1	NA	NA	NA	NA		lissa	1	9	-17.9572	17.9488	0.115738
L12-2	c	L12		field	NA	24	27-Jun	2016	03-Jun	604	92.1	NA	NA	58	NA	NA	NA	NA		lissa	1	9	-15.832	19.0386	0.0721717
L12-2	c	L12		field	NA	21	24-Jun	2016	03-Jun	500	86.82	NA	NA	57.62	NA	NA	NA	NA		lissa	1	9	-15.832	19.0386	0.0721717
L12-2	c	L12		field	NA	26	29-Jun	2016	03-Jun	672	94.26	NA	NA	60.32	NA	NA	NA	NA		lissa	1	9	-15.832	19.0386	0.0721717
L12-2	c	L12		field	NA	28	01-Jul	2016	03-Jun	598	96.5	NA	NA	61.1	NA	NA	NA	NA		lissa	1	9	-15.832	19.0386	0.0721717
L12-2	NA	L12		field	NA	33	06-Jul	2016	03-Jun	739	101.67	NA	NA	61.58	NA	NA	NA	NA		lissa	1	9	NA	NA	NA
L12-2	NA	L12		field	NA	35	08-Jul	2016	03-Jun	689	103.5	NA	NA	60.7	NA	NA	NA	NA		lissa	1	9	NA	NA	NA
L12-2	NA	L12		field	NA	31	04-Jul	2016	03-Jun	672	98.5	NA	NA	60.7	NA	NA	NA	NA		lissa	1	9	NA	NA	NA
L12-3	a	L12		field	NA	9	13-Jun	2016	04-Jun	121	60.6	NA	NA	34.6	NA	NA	NA	NA		lissa	3	10	NA	NA	NA
L12-3	a	L12		field	NA	6	10-Jun	2016	04-Jun	110	57.7	NA	NA	30.5	NA	NA	NA	NA		lissa	3	10	NA	NA	NA
L12-3	a	L12		field	NA	4	08-Jun	2016	04-Jun	76	52.29	NA	NA	27.07	NA	NA	NA	NA		lissa	3	10	NA	NA	NA
L12-3	a	L12		field	NA	2	06-Jun	2016	04-Jun	50	47.8	NA	NA	26	NA	NA	NA	NA	2d - eigen	lissa	3	10	NA	NA	NA
L12-3	b	L12		field	NA	11	15-Jun	2016	04-Jun	123	62.5	NA	NA	35.3	NA	NA	NA	NA		lissa	3	10	NA	NA	NA
L12-3	b	L12		field	NA	13	17-Jun	2016	04-Jun	121	65.3	NA	NA	37.4	NA	NA	NA	NA		lissa	3	10	NA	NA	NA
L13-1	a	L13		field	NA	10	13-Jun	2016	03-Jun	313	70.7	NA	NA	43.3	NA	NA	NA	NA		lissa	1	9	-15.7644	19.5882	0.0641373
L13-1	a	L13		field	NA	3	06-Jun	2016	03-Jun	86	53.1	NA	NA	30.9	NA	NA	NA	NA	3d - eigen	lissa	1	9	-15.7644	19.5882	0.0641373
L13-1	a	L13		field	NA	5	08-Jun	2016	03-Jun	108	55.83	NA	NA	30.8	NA	NA	NA	NA		lissa	1	9	-15.7644	19.5882	0.0641373
L13-1	a	L13		field	NA	7	10-Jun	2016	03-Jun	207	64.2	NA	NA	38.1	NA	NA	NA	NA		lissa	1	9	-15.7644	19.5882	0.0641373
L13-1	b	L13		field	NA	12	15-Jun	2016	03-Jun	392	75.6	NA	NA	50	NA	NA	NA	NA		lissa	1	9	-16.3946	19.8062	0.0650137
L13-1	b	L13		field	NA	19	22-Jun	2016	03-Jun	538	85.3	NA	NA	56.5	NA	NA	NA	NA		lissa	1	9	-16.3946	19.8062	0.0650137
L13-1	b	L13		field	NA	17	20-Jun	2016	03-Jun	534	83.4	NA	NA	58.3	NA	NA	NA	NA		lissa	1	9	-16.3946	19.8062	0.0650137
L13-1	b	L13		field	NA	14	17-Jun	2016	03-Jun	415	77.9	NA	NA	53.3	NA	NA	NA	NA		lissa	1	9	-16.3946	19.8062	0.0650137
L13-1	c	L13		field	NA	28	01-Jul	2016	03-Jun	670	96.4	NA	NA	62	NA	NA	NA	NA		lissa	1	9	-16.065	19.1458	0.0728262
L13-1	c	L13		field	NA	21	24-Jun	2016	03-Jun	565	88.61	NA	NA	59.28	NA	NA	NA	NA		lissa	1	9	-16.065	19.1458	0.0728262
L13-1	c	L13		field	NA	26	29-Jun	2016	03-Jun	636	93.88	NA	NA	61.9	NA	NA	NA	NA		lissa	1	9	-16.065	19.1458	0.0728262
L13-1	c	L13		field	NA	24	27-Jun	2016	03-Jun	701	91.6	NA	NA	60.9	NA	NA	NA	NA		lissa	1	9	-16.065	19.1458	0.0728262
L13-1	NA	L13		field	NA	33	06-Jul	2016	03-Jun	763	101.66	NA	NA	63.07	NA	NA	NA	NA		lissa	1	9	NA	NA	NA
L13-1	NA	L13		field	NA	31	04-Jul	2016	03-Jun	789	100.3	NA	NA	62	NA	NA	NA	NA	A.ZOH (l/u)	lissa	1	9	NA	NA	NA
L13-1	NA	L13		field	NA	35	08-Jul	2016	03-Jun	725	103.1	NA	NA	61.9	NA	NA	NA	NA		lissa	1	9	NA	NA	NA
L13-2	a	L13		field	NA	10	13-Jun	2016	03-Jun	389	75.4	NA	NA	50.7	NA	NA	NA	NA		lissa	2	9	-15.7806	20.3817	0.0549071
L13-2	a	L13		field	NA	3	06-Jun	2016	03-Jun	121	57.2	NA	NA	32.5	NA	NA	NA	NA	3d - eigen	lissa	2	9	-15.7806	20.3817	0.0549071
L13-2	a	L13		field	NA	7	10-Jun	2016	03-Jun	261	68.5	NA	NA	41.3	NA	NA	NA	NA		lissa	2	9	-15.7806	20.3817	0.0549071
L13-2	a	L13		field	NA	5	08-Jun	2016	03-Jun	184	63.34	NA	NA	38.27	NA	NA	NA	NA		lissa	2	9	-15.7806	20.3817	0.0549071
L13-2	b	L13		field	NA	17	20-Jun	2016	03-Jun	624	87.4	NA	NA	59.5	NA	NA	NA	NA		lissa	2	9	-16.2689	18.7416	0.0818496
L13-2	b	L13		field	NA	19	22-Jun	2016	03-Jun	624	91.3	NA	NA	60.6	NA	NA	NA	NA		lissa	2	9	-16.2689	18.7416	0.0818496
L13-2	b	L13		field	NA	12	15-Jun	2016	03-Jun	446	79.4	NA	NA	50.4	NA	NA	NA	NA		lissa	2	9	-16.2689	18.7416	0.0818496
L13-2	b	L13		field	NA	14	17-Jun	2016	03-Jun	481	82.4	NA	NA	56.1	NA	NA	NA	NA		lissa	2	9	-16.2689	18.7416	0.0818496
L13-2	c	L13		field	NA	24	27-Jun	2016	03-Jun	647	95.8	NA	NA	65	NA	NA	NA	NA		lissa	2	9	-15.9426	19.9862	0.060231
L13-2	c	L13		field	NA	28	01-Jul	2016	03-Jun	725	101	NA	NA	63.6	NA	NA	NA	NA		lissa	2	9	-15.9426	19.9862	0.060231
L13-2	c	L13		field	NA	21	24-Jun	2016	03-Jun	621	93.82	NA	NA	62.5	NA	NA	NA	NA		lissa	2	9	-15.9426	19.9862	0.060231
L13-2	c	L13		field	NA	26	29-Jun	2016	03-Jun	695	98.77	NA	NA	63.58	NA	NA	NA	NA		lissa	2	9	-15.9426	19.9862	0.060231
L13-2	NA	L13		field	NA	33	06-Jul	2016	03-Jun	769	105.64	NA	NA	63.58	NA	NA	NA	NA		lissa	2	9	NA	NA	NA
L13-2	NA	L13		field	NA	31	04-Jul	2016	03-Jun	791	104.2	NA	NA	61	NA	NA	NA	NA	AWO.S (l/u)	lissa	2	9	NA	NA	NA
L13-3	a	L13		field	NA	6	10-Jun	2016	04-Jun	157	60.8	NA	NA	36	NA	NA	NA	NA		lissa	3	10	NA	NA	NA
L13-3	a	L13		field	NA	4	08-Jun	2016	04-Jun	144	58.89	NA	NA	35.78	NA	NA	NA	NA		lissa	3	10	NA	NA	NA
L13-3	a	L13		field	NA	2	06-Jun	2016	04-Jun	56	50	NA	NA	27.6	NA	NA	NA	NA	2d - eigen	lissa	3	10	NA	NA	NA
L13-3	a	L13		field	NA	9	13-Jun	2016	04-Jun	245	68.6	NA	NA	41.7	NA	NA	NA	NA		lissa	3	10	NA	NA	NA
L13-3	b	L13		field	NA	20	24-Jun	2016	04-Jun	482	85.22	NA	NA	54.97	NA	NA	NA	NA		lissa	3	10	NA	NA	NA
L13-3	b	L13		field	NA	16	20-Jun	2016	04-Jun	433	79.4	NA	NA	49.8	NA	NA	NA	NA		lissa	3	10	NA	NA	NA
L13-3	b	L13		field	NA	18	22-Jun	2016	04-Jun	480	82	NA	NA	54.2	NA	NA	NA	NA		lissa	3	10	NA	NA	NA
L13-3	b	L13		field	NA	11	15-Jun	2016	04-Jun	308	72.2	NA	NA	45	NA	NA	NA	NA		lissa	3	10	NA	NA	NA
L13-3	b	L13		field	NA	13	17-Jun	2016	04-Jun	323	74.5	NA	NA	51.8	NA	NA	NA	NA		lissa	3	10	NA	NA	NA
L13-3	c	L13		field	NA	23	27-Jun	2016	04-Jun	591	87.3	NA	NA	58.3	NA	NA	NA	NA		lissa	3	10	NA	NA	NA
L14-1	a	L14		field	NA	2	08-Jun	2016	06-Jun	77	50.27	NA	NA	26.34	NA	NA	NA	NA	2d - eigen	lissa	1	12	-15.5615	20.2532	0.0549434
L14-1	a	L14		field	NA	9	15-Jun	2016	06-Jun	240	66.8	NA	NA	39.2	NA	NA	NA	NA		lissa	1	12	-15.5615	20.2532	0.0549434
L14-1	a	L14		field	NA	4	10-Jun	2016	06-Jun	100	55.6	NA	NA	30	NA	NA	NA	NA		lissa	1	12	-15.5615	20.2532	0.0549434
L14-1	a	L14		field	NA	7	13-Jun	2016	06-Jun	206	61.2	NA	NA	37.5	NA	NA	NA	NA		lissa	1	12	-15.5615	20.2532	0.0549434
L14-1	b	L14		field	NA	18	24-Jun	2016	06-Jun	522	83.93	NA	NA	56.67	NA	NA	NA	NA		lissa	1	12	-15.1953	20.1073	0.0545072
L14-1	b	L14		field	NA	16	22-Jun	2016	06-Jun	454	80.6	NA	NA	52.8	NA	NA	NA	NA		lissa	1	12	-15.1953	20.1073	0.0545072
L14-1	b	L14		field	NA	11	17-Jun	2016	06-Jun	324	71.4	NA	NA	45.4	NA	NA	NA	NA		lissa	1	12	-15.1953	20.1073	0.0545072
L14-1	b	L14		field	NA	14	20-Jun	2016	06-Jun	436	76.8	NA	NA	49.7	NA	NA	NA	NA		lissa	1	12	-15.1953	20.1073	0.0545072
L14-1	c	L14		field	NA	28	04-Jul	2016	06-Jun	683	97.3	NA	NA	58.1	NA	NA	NA	NA		lissa	1	12	-14.8485	19.5102	0.0598234
L14-1	c	L14		field	NA	25	01-Jul	2016	06-Jun	NA	64.4	NA	NA	58.6	NA	NA	NA	NA		lissa	1	12	-14.8485	19.5102	0.0598234
L14-1	c	L14		field	NA	23	29-Jun	2016	06-Jun	601	92.11	NA	NA	59.34	NA	NA	NA	NA		lissa	1	12	-14.8485	19.5102	0.0598234
L14-1	c	L14		field	NA	21	27-Jun	2016	06-Jun	602	87.6	NA	NA	58.6	NA	NA	NA	NA		lissa	1	12	-14.8485	19.5102	0.0598234
L14-1	c	L14		field	NA	30	06-Jul	2016	06-Jun	720	100.15	NA	NA	61	NA	NA	NA	NA		lissa	1	12	-14.8485	19.5102	0.0598234
L14-1	NA	L14		field	NA	32	08-Jul	2016	06-Jun	613	101.9	NA	NA	58.3	NA	NA	NA	NA		lissa	1	12	NA	NA	NA
L14-1	NA	L14		field	NA	37	13-Jul	2016	06-Jun	711	105.95	NA	NA	58.69	NA	NA	NA	NA	AT.OR (r/u)	lissa	1	12	NA	NA	NA
L14-2	a	L14		field	NA	3	10-Jun	2016	07-Jun	78	52.2	NA	NA	32.1	NA	NA	NA	NA		lissa	2	13	-16.0144	19.6136	0.0652096
L14-2	a	L14		field	NA	10	17-Jun	2016	07-Jun	284	70.3	NA	NA	45.2	NA	NA	NA	NA		lissa	2	13	-16.0144	19.6136	0.0652096
L14-2	a	L14		field	NA	6	13-Jun	2016	07-Jun	145	59.4	NA	NA	34.3	NA	NA	NA	NA		lissa	2	13	-16.0144	19.6136	0.0652096
L14-2	a	L14		field	NA	8	15-Jun	2016	07-Jun	222	65.3	NA	NA	39.2	NA	NA	NA	NA		lissa	2	13	-16.0144	19.6136	0.0652096
L14-2	a	L14		field	NA	1	08-Jun	2016	07-Jun	56	47.69	NA	NA	24	NA	NA	NA	NA	1d - eigen	lissa	2	13	-16.0144	19.6136	0.0652096
L14-2	b	L14		field	NA	20	27-Jun	2016	07-Jun	672	91.1	NA	NA	61.7	NA	NA	NA	NA		lissa	2	13	-16.6041	19.9775	0.0633469
L14-2	b	L14		field	NA	13	20-Jun	2016	07-Jun	376	77.5	NA	NA	51.8	NA	NA	NA	NA		lissa	2	13	-16.6041	19.9775	0.0633469
L14-2	b	L14		field	NA	17	24-Jun	2016	07-Jun	543	86.01	NA	NA	59.33	NA	NA	NA	NA		lissa	2	13	-16.6041	19.9775	0.0633469
L14-2	b	L14		field	NA	15	22-Jun	2016	07-Jun	NA	52.8	NA	NA	55.7	NA	NA	NA	NA		lissa	2	13	-16.6041	19.9775	0.0633469
L14-2	c	L14		field	NA	27	04-Jul	2016	07-Jun	813	101.7	NA	NA	64.5	NA	NA	NA	NA	A.SOZ (r/u)	lissa	2	13	-15.3104	19.6453	0.0609442
L14-2	c	L14		field	NA	29	06-Jul	2016	07-Jun	850	104.97	NA	NA	65.51	NA	NA	NA	NA		lissa	2	13	-15.3104	19.6453	0.0609442
L14-2	c	L14		field	NA	22	29-Jun	2016	07-Jun	676	95.45	NA	NA	63.13	NA	NA	NA	NA		lissa	2	13	-15.3104	19.6453	0.0609442
L14-2	c	L14		field	NA	24	01-Jul	2016	07-Jun	742	98	NA	NA	64.9	NA	NA	NA	NA		lissa	2	13	-15.3104	19.6453	0.0609442
L14-2	NA	L14		field	NA	31	08-Jul	2016	07-Jun	766	105.8	NA	NA	65.7	NA	NA	NA	NA		lissa	2	13	NA	NA	NA
L14-2	NA	L14		field	NA	36	13-Jul	2016	07-Jun	931	111.23	NA	NA	65.38	NA	NA	NA	NA		lissa	2	13	NA	NA	NA
L16-1	a	L16		field	NA	9	15-Jun	2016	06-Jun	232	66.8	NA	NA	42.5	NA	NA	NA	NA		lissa	1	12	-15.6587	20.274	0.0549467
L16-1	a	L16		field	NA	4	10-Jun	2016	06-Jun	115	56.1	NA	NA	32.3	NA	NA	NA	NA		lissa	1	12	-15.6587	20.274	0.0549467
L16-1	a	L16		field	NA	0	06-Jun	2016	06-Jun	50	44.9	NA	NA	25.5	NA	NA	NA	NA	0d - eigen	lissa	1	12	-15.6587	20.274	0.0549467
L16-1	a	L16		field	NA	2	08-Jun	2016	06-Jun	75	50.84	NA	NA	27.09	NA	NA	NA	NA		lissa	1	12	-15.6587	20.274	0.0549467
L16-1	a	L16		field	NA	7	13-Jun	2016	06-Jun	189	62.1	NA	NA	36.8	NA	NA	NA	NA		lissa	1	12	-15.6587	20.274	0.0549467
L16-1	b	L16		field	NA	11	17-Jun	2016	06-Jun	NA	70.4	NA	NA	45.7	NA	NA	NA	NA		lissa	1	12	-16.16	18.7926	0.0802979
L16-1	b	L16		field	NA	16	22-Jun	2016	06-Jun	415	78.3	NA	NA	53.3	NA	NA	NA	NA		lissa	1	12	-16.16	18.7926	0.0802979
L16-1	b	L16		field	NA	18	24-Jun	2016	06-Jun	406	81.47	NA	NA	54.89	NA	NA	NA	NA		lissa	1	12	-16.16	18.7926	0.0802979
L16-1	b	L16		field	NA	14	20-Jun	2016	06-Jun	387	75.4	NA	NA	49	NA	NA	NA	NA		lissa	1	12	-16.16	18.7926	0.0802979
L16-1	c	L16		field	NA	28	04-Jul	2016	06-Jun	622	92.4	NA	NA	59.1	NA	NA	NA	NA		lissa	1	12	-16.0396	18.3031	0.0878906
L16-1	c	L16		field	NA	21	27-Jun	2016	06-Jun	540	83.8	NA	NA	57.8	NA	NA	NA	NA		lissa	1	12	-16.0396	18.3031	0.0878906
L16-1	c	L16		field	NA	25	01-Jul	2016	06-Jun	570	88.2	NA	NA	58.4	NA	NA	NA	NA		lissa	1	12	-16.0396	18.3031	0.0878906
L16-1	c	L16		field	NA	23	29-Jun	2016	06-Jun	506	86.22	NA	NA	58.07	NA	NA	NA	NA		lissa	1	12	-16.0396	18.3031	0.0878906
L16-1	c	L16		field	NA	30	06-Jul	2016	06-Jun	628	94.47	NA	NA	60.54	NA	NA	NA	NA		lissa	1	12	-16.0396	18.3031	0.0878906
L16-1	NA	L16		field	NA	32	08-Jul	2016	06-Jun	706	96.2	NA	NA	60.2	NA	NA	NA	NA		lissa	1	12	NA	NA	NA
L16-2	a	L16		field	NA	9	15-Jun	2016	06-Jun	253	68.7	NA	NA	41.2	NA	NA	NA	NA		lissa	2	12	-16.0034	19.796	0.0630972
L16-2	a	L16		field	NA	0	06-Jun	2016	06-Jun	50	47.2	NA	NA	25.8	NA	NA	NA	NA	0d - eigen	lissa	2	12	-16.0034	19.796	0.0630972
L16-2	a	L16		field	NA	4	10-Jun	2016	06-Jun	111	57.9	NA	NA	32.3	NA	NA	NA	NA		lissa	2	12	-16.0034	19.796	0.0630972
L16-2	a	L16		field	NA	7	13-Jun	2016	06-Jun	191	64.4	NA	NA	38.5	NA	NA	NA	NA		lissa	2	12	-16.0034	19.796	0.0630972
L16-2	a	L16		field	NA	2	08-Jun	2016	06-Jun	80	52.16	NA	NA	27.81	NA	NA	NA	NA		lissa	2	12	-16.0034	19.796	0.0630972
L16-2	b	L16		field	NA	16	22-Jun	2016	06-Jun	447	83.4	NA	NA	54.7	NA	NA	NA	NA		lissa	2	12	-16.3338	19.1588	0.0745452
L16-2	b	L16		field	NA	14	20-Jun	2016	06-Jun	432	80	NA	NA	51.6	NA	NA	NA	NA		lissa	2	12	-16.3338	19.1588	0.0745452
L16-2	b	L16		field	NA	18	24-Jun	2016	06-Jun	458	85.51	NA	NA	56.34	NA	NA	NA	NA		lissa	2	12	-16.3338	19.1588	0.0745452
L16-2	b	L16		field	NA	11	17-Jun	2016	06-Jun	NA	73.8	NA	NA	45.8	NA	NA	NA	NA		lissa	2	12	-16.3338	19.1588	0.0745452
L16-2	c	L16		field	NA	23	29-Jun	2016	06-Jun	524	89.89	NA	NA	59.01	NA	NA	NA	NA		lissa	2	12	-16.6391	18.4655	0.089892
L16-2	c	L16		field	NA	25	01-Jul	2016	06-Jun	570	93.7	NA	NA	60.5	NA	NA	NA	NA		lissa	2	12	-16.6391	18.4655	0.089892
L16-2	c	L16		field	NA	30	06-Jul	2016	06-Jun	662	99.36	NA	NA	62.46	NA	NA	NA	NA		lissa	2	12	-16.6391	18.4655	0.089892
L16-2	c	L16		field	NA	21	27-Jun	2016	06-Jun	533	87.8	NA	NA	58.6	NA	NA	NA	NA		lissa	2	12	-16.6391	18.4655	0.089892
L16-2	c	L16		field	NA	28	04-Jul	2016	06-Jun	476	96.4	NA	NA	61.4	NA	NA	NA	NA		lissa	2	12	-16.6391	18.4655	0.089892
L16-3	a	L16		field	NA	0	08-Jun	2016	08-Jun	54	45.82	NA	NA	23.98	NA	NA	NA	NA	0d - eigen	lissa	3	14	NA	NA	NA
L16-3	a	L16		field	NA	2	10-Jun	2016	08-Jun	67	48.6	NA	NA	28.2	NA	NA	NA	NA		lissa	3	14	NA	NA	NA
L17-1	a	L17		field	NA	1	13-Jun	2016	12-Jun	62	47.5	NA	NA	26.6	NA	NA	NA	NA	1d - eigen	lissa	2	18	NA	NA	NA
L17-1	a	L17		field	NA	3	15-Jun	2016	12-Jun	82	51.9	NA	NA	28.6	NA	NA	NA	NA		lissa	2	18	NA	NA	NA
L17-1	a	L17		field	NA	10	22-Jun	2016	12-Jun	260	67.8	NA	NA	41.4	NA	NA	NA	NA		lissa	2	18	NA	NA	NA
L17-1	a	L17		field	NA	5	17-Jun	2016	12-Jun	NA	54.7	NA	NA	32.7	NA	NA	NA	NA		lissa	2	18	NA	NA	NA
L17-1	a	L17		field	NA	8	20-Jun	2016	12-Jun	190	62.8	NA	NA	39	NA	NA	NA	NA		lissa	2	18	NA	NA	NA
L17-1	b	L17		field	NA	15	27-Jun	2016	12-Jun	408	77.3	NA	NA	52.7	NA	NA	NA	NA		lissa	2	18	NA	NA	NA
L17-1	b	L17		field	NA	17	29-Jun	2016	12-Jun	431	80.44	NA	NA	55.54	NA	NA	NA	NA		lissa	2	18	NA	NA	NA
L17-1	b	L17		field	NA	19	01-Jul	2016	12-Jun	517	84.2	NA	NA	59.9	NA	NA	NA	NA		lissa	2	18	NA	NA	NA
L17-1	b	L17		field	NA	12	24-Jun	2016	12-Jun	314	72.25	NA	NA	46.38	NA	NA	NA	NA		lissa	2	18	NA	NA	NA
L17-1	c	L17		field	NA	22	04-Jul	2016	12-Jun	552	97.1	NA	NA	60.2	NA	NA	NA	NA		lissa	2	18	NA	NA	NA
L17-1	c	L17		field	NA	24	06-Jul	2016	12-Jun	654	90.08	NA	NA	61.47	NA	NA	NA	NA		lissa	2	18	NA	NA	NA
L17-2	a	L17		field	NA	7	17-Jun	2016	10-Jun	NA	68	NA	NA	44.5	NA	NA	NA	NA		lissa	1	16	-18.4844	17.9431	0.119759
L17-2	a	L17		field	NA	0	10-Jun	2016	10-Jun	63	50.2	NA	NA	27.2	NA	NA	NA	NA	0d - eigen	lissa	1	16	-18.4844	17.9431	0.119759
L17-2	a	L17		field	NA	3	13-Jun	2016	10-Jun	109	57.5	NA	NA	34	NA	NA	NA	NA		lissa	1	16	-18.4844	17.9431	0.119759
L17-2	a	L17		field	NA	5	15-Jun	2016	10-Jun	166	62	NA	NA	38	NA	NA	NA	NA		lissa	1	16	-18.4844	17.9431	0.119759
L17-2	a	L17		field	NA	10	20-Jun	2016	10-Jun	347	74	NA	NA	47.1	NA	NA	NA	NA		lissa	1	16	-18.4844	17.9431	0.119759
L17-2	b	L17		field	NA	14	24-Jun	2016	10-Jun	482	82.45	NA	NA	55.79	NA	NA	NA	NA		lissa	1	16	-17.1642	18.688	0.0891703
L17-2	b	L17		field	NA	17	27-Jun	2016	10-Jun	590	87.1	NA	NA	60.1	NA	NA	NA	NA		lissa	1	16	-17.1642	18.688	0.0891703
L17-2	b	L17		field	NA	12	22-Jun	2016	10-Jun	429	77.2	NA	NA	50.2	NA	NA	NA	NA		lissa	1	16	-17.1642	18.688	0.0891703
L17-2	b	L17		field	NA	19	29-Jun	2016	10-Jun	627	91.47	NA	NA	62.26	NA	NA	NA	NA		lissa	1	16	-17.1642	18.688	0.0891703
L17-2	c	L17		field	NA	24	04-Jul	2016	10-Jun	735	98.2	NA	NA	65	NA	NA	NA	NA		lissa	1	16	-15.7811	19.1478	0.0712633
L17-2	c	L17		field	NA	28	08-Jul	2016	10-Jun	810	103.6	NA	NA	65.9	NA	NA	NA	NA		lissa	1	16	-15.7811	19.1478	0.0712633
L17-2	c	L17		field	NA	21	01-Jul	2016	10-Jun	649	93.4	NA	NA	63.5	NA	NA	NA	NA		lissa	1	16	-15.7811	19.1478	0.0712633
L17-2	c	L17		field	NA	26	06-Jul	2016	10-Jun	786	101.31	NA	NA	66.24	NA	NA	NA	NA		lissa	1	16	-15.7811	19.1478	0.0712633
L18-1	a	L18		field	NA	8	15-Jun	2016	07-Jun	106	59.2	NA	NA	30.6	NA	NA	NA	NA		lissa	1	13	-16.3593	20.233	0.0592
L18-1	a	L18		field	NA	6	13-Jun	2016	07-Jun	74	54.1	NA	NA	30.4	NA	NA	NA	NA		lissa	1	13	-16.3593	20.233	0.0592
L18-1	a	L18		field	NA	1	08-Jun	2016	07-Jun	63	50.24	NA	NA	25.25	NA	NA	NA	NA	1d - eigen	lissa	1	13	-16.3593	20.233	0.0592
L18-1	a	L18		field	NA	10	17-Jun	2016	07-Jun	NA	63.9	NA	NA	32	NA	NA	NA	NA		lissa	1	13	-16.3593	20.233	0.0592
L18-1	b	L18		field	NA	20	27-Jun	2016	07-Jun	433	82.6	NA	NA	52.4	NA	NA	NA	NA		lissa	1	13	-16.4475	19.7223	0.0660598
L18-1	b	L18		field	NA	15	22-Jun	2016	07-Jun	303	74.6	NA	NA	43.3	NA	NA	NA	NA		lissa	1	13	-16.4475	19.7223	0.0660598
L18-1	b	L18		field	NA	17	24-Jun	2016	07-Jun	387	87.69	NA	NA	59.59	NA	NA	NA	NA		lissa	1	13	-16.4475	19.7223	0.0660598
L18-1	b	L18		field	NA	13	20-Jun	2016	07-Jun	238	69.5	NA	NA	40.7	NA	NA	NA	NA		lissa	1	13	-16.4475	19.7223	0.0660598
L18-1	c	L18		field	NA	29	06-Jul	2016	07-Jun	606	95.05	NA	NA	60.48	NA	NA	NA	NA		lissa	1	13	-17.927	16.7333	0.159036
L18-1	c	L18		field	NA	27	04-Jul	2016	07-Jun	569	91	NA	NA	58.6	NA	NA	NA	NA		lissa	1	13	-17.927	16.7333	0.159036
L18-1	c	L18		field	NA	22	29-Jun	2016	07-Jun	487	85.58	NA	NA	55.46	NA	NA	NA	NA		lissa	1	13	-17.927	16.7333	0.159036
L18-1	c	L18		field	NA	24	01-Jul	2016	07-Jun	508	88.3	NA	NA	56.4	NA	NA	NA	NA		lissa	1	13	-17.927	16.7333	0.159036
L18-1	NA	L18		field	NA	36	13-Jul	2016	07-Jun	724	103.68	NA	NA	63.35	NA	NA	NA	NA	A.ZOA (r/u)	lissa	1	13	NA	NA	NA
L18-1	NA	L18		field	NA	31	08-Jul	2016	07-Jun	631	97.2	NA	NA	62	NA	NA	NA	NA		lissa	1	13	NA	NA	NA
L18-2	a	L18		field	NA	1	08-Jun	2016	07-Jun	62	49.41	NA	NA	24.56	NA	NA	NA	NA	1d - eigen	lissa	2	13	NA	NA	NA
L18-2	a	L18		field	NA	3	10-Jun	2016	07-Jun	71	52.1	NA	NA	27.9	NA	NA	NA	NA		lissa	2	13	NA	NA	NA
L18-2	a	L18		field	NA	3	10-Jun	2016	07-Jun	57	53.8	NA	NA	28.3	NA	NA	NA	NA		lissa	2	13	NA	NA	NA
L18-2	a	L18		field	NA	6	13-Jun	2016	07-Jun	127	57.8	NA	NA	36.2	NA	NA	NA	NA		lissa	2	13	NA	NA	NA
L18-2	a	L18		field	NA	8	15-Jun	2016	07-Jun	184	63.8	NA	NA	38.1	NA	NA	NA	NA		lissa	2	13	NA	NA	NA
L18-2	a	L18		field	NA	10	17-Jun	2016	07-Jun	NA	65.5	NA	NA	41.5	NA	NA	NA	NA		lissa	2	13	NA	NA	NA
L18-2	b	L18		field	NA	17	24-Jun	2016	07-Jun	485	82.57	NA	NA	54.47	NA	NA	NA	NA		lissa	2	13	NA	NA	NA
L18-2	b	L18		field	NA	20	27-Jun	2016	07-Jun	523	85.4	NA	NA	55.7	NA	NA	NA	NA		lissa	2	13	NA	NA	NA
L18-2	b	L18		field	NA	13	20-Jun	2016	07-Jun	324	73.5	NA	NA	46.8	NA	NA	NA	NA		lissa	2	13	NA	NA	NA
L18-2	b	L18		field	NA	15	22-Jun	2016	07-Jun	419	78.4	NA	NA	51.3	NA	NA	NA	NA		lissa	2	13	NA	NA	NA
L18-2	c	L18		field	NA	22	29-Jun	2016	07-Jun	542	88.5	NA	NA	58.71	NA	NA	NA	NA		lissa	2	13	NA	NA	NA
L18-2	c	L18		field	NA	24	01-Jul	2016	07-Jun	534	90	NA	NA	58.5	NA	NA	NA	NA		lissa	2	13	NA	NA	NA
L18-2	c	L18		field	NA	27	04-Jul	2016	07-Jun	580	92.5	NA	NA	60.7	NA	NA	NA	NA		lissa	2	13	NA	NA	NA
L18-2	c	L18		field	NA	29	06-Jul	2016	07-Jun	609	95.24	NA	NA	61.42	NA	NA	NA	NA		lissa	2	13	NA	NA	NA
L18-2	NA	L18		field	NA	31	08-Jul	2016	07-Jun	633	96.9	NA	NA	61.3	NA	NA	NA	NA		lissa	2	13	NA	NA	NA
L18-3	a	L18		field	NA	6	13-Jun	2016	07-Jun	94	55.1	NA	NA	32.5	NA	NA	NA	NA		lissa	3	13	-17.5829	19.376	0.0783627
L18-3	a	L18		field	NA	10	17-Jun	2016	07-Jun	NA	64	NA	NA	38.7	NA	NA	NA	NA		lissa	3	13	-17.5829	19.376	0.0783627
L18-3	a	L18		field	NA	8	15-Jun	2016	07-Jun	126	59	NA	NA	32.5	NA	NA	NA	NA		lissa	3	13	-17.5829	19.376	0.0783627
L18-3	a	L18		field	NA	3	10-Jun	2016	07-Jun	54	48.9	NA	NA	28.8	NA	NA	NA	NA		lissa	3	13	-17.5829	19.376	0.0783627
L18-3	b	L18		field	NA	17	24-Jun	2016	07-Jun	313	78.18	NA	NA	50.44	NA	NA	NA	NA		lissa	3	13	-16.6585	19.2623	0.075398
L18-3	b	L18		field	NA	13	20-Jun	2016	07-Jun	250	70.1	NA	NA	43.8	NA	NA	NA	NA		lissa	3	13	-16.6585	19.2623	0.075398
L18-3	b	L18		field	NA	15	22-Jun	2016	07-Jun	304	73.7	NA	NA	47.6	NA	NA	NA	NA		lissa	3	13	-16.6585	19.2623	0.075398
L18-3	b	L18		field	NA	20	27-Jun	2016	07-Jun	401	81.6	NA	NA	52.8	NA	NA	NA	NA		lissa	3	13	-16.6585	19.2623	0.075398
L18-3	c	L18		field	NA	29	06-Jul	2016	07-Jun	522	92.64	NA	NA	58.48	NA	NA	NA	NA		lissa	3	13	-17.7792	17.0172	0.145622
L18-3	c	L18		field	NA	24	01-Jul	2016	07-Jun	454	86.6	NA	NA	55	NA	NA	NA	NA		lissa	3	13	-17.7792	17.0172	0.145622
L18-3	c	L18		field	NA	27	04-Jul	2016	07-Jun	532	88.1	NA	NA	58.7	NA	NA	NA	NA		lissa	3	13	-17.7792	17.0172	0.145622
L18-3	c	L18		field	NA	22	29-Jun	2016	07-Jun	457	84.46	NA	NA	55.4	NA	NA	NA	NA		lissa	3	13	-17.7792	17.0172	0.145622
L18-3	NA	L18		field	NA	36	13-Jul	2016	07-Jun	587	99.37	NA	NA	61.13	NA	NA	NA	NA	ASO.C (l/u)	lissa	3	13	NA	NA	NA
L18-3	NA	L18		field	NA	31	08-Jul	2016	07-Jun	552	93.6	NA	NA	58.4	NA	NA	NA	NA		lissa	3	13	NA	NA	NA
L19-1	a	L19		field	NA	9	13-Jun	2016	04-Jun	234	67	NA	NA	42.7	NA	NA	NA	NA		lissa	1	10	-14.8604	20.4833	0.0504
L19-1	a	L19		field	NA	2	06-Jun	2016	04-Jun	66	49.5	NA	NA	27.9	NA	NA	NA	NA	2d - eigen	lissa	1	10	-14.8604	20.4833	0.0504
L19-1	a	L19		field	NA	4	08-Jun	2016	04-Jun	121	56.05	NA	NA	30.38	NA	NA	NA	NA		lissa	1	10	-14.8604	20.4833	0.0504
L19-1	a	L19		field	NA	6	10-Jun	2016	04-Jun	157	61.9	NA	NA	35.5	NA	NA	NA	NA		lissa	1	10	-14.8604	20.4833	0.0504
L19-1	b	L19		field	NA	13	17-Jun	2016	04-Jun	NA	76.3	NA	NA	50.7	NA	NA	NA	NA		lissa	1	10	-14.994	20.2511	0.0529
L19-1	b	L19		field	NA	16	20-Jun	2016	04-Jun	353	80.6	NA	NA	54.6	NA	NA	NA	NA		lissa	1	10	-14.994	20.2511	0.0529
L19-1	b	L19		field	NA	11	15-Jun	2016	04-Jun	326	72.6	NA	NA	45.9	NA	NA	NA	NA		lissa	1	10	-14.994	20.2511	0.0529
L19-1	b	L19		field	NA	18	22-Jun	2016	04-Jun	395	82.7	NA	NA	55.6	NA	NA	NA	NA		lissa	1	10	-14.994	20.2511	0.0529
L19-1	b	L19		field	NA	20	24-Jun	2016	04-Jun	427	84.99	NA	NA	56.85	NA	NA	NA	NA		lissa	1	10	-14.994	20.2511	0.0529
L19-1	c	L19		field	NA	23	27-Jun	2016	04-Jun	450	86.9	NA	NA	57	NA	NA	NA	NA		lissa	1	10	-14.8828	19.9482	0.0552843
L19-1	c	L19		field	NA	27	01-Jul	2016	04-Jun	379	89.2	NA	NA	57.2	NA	NA	NA	NA		lissa	1	10	-14.8828	19.9482	0.0552843
L19-1	c	L19		field	NA	25	29-Jun	2016	04-Jun	388	88.1	NA	NA	58.25	NA	NA	NA	NA		lissa	1	10	-14.8828	19.9482	0.0552843
L19-2	a	L19		field	NA	6	10-Jun	2016	04-Jun	176	64.3	NA	NA	38.3	NA	NA	NA	NA		lissa	2	10	-15.06	20.5808	0.0494981
L19-2	a	L19		field	NA	9	13-Jun	2016	04-Jun	267	70.3	NA	NA	43.3	NA	NA	NA	NA		lissa	2	10	-15.06	20.5808	0.0494981
L19-2	a	L19		field	NA	4	08-Jun	2016	04-Jun	134	59.16	NA	NA	34.19	NA	NA	NA	NA		lissa	2	10	-15.06	20.5808	0.0494981
L19-2	a	L19		field	NA	2	06-Jun	2016	04-Jun	68	52.8	NA	NA	30	NA	NA	NA	NA	2d - eigen	lissa	2	10	-15.06	20.5808	0.0494981
L19-2	b	L19		field	NA	13	17-Jun	2016	04-Jun	NA	80.8	NA	NA	55.8	NA	NA	NA	NA		lissa	2	10	-15.1022	19.907	0.0572
L19-2	b	L19		field	NA	20	24-Jun	2016	04-Jun	524	90.45	NA	NA	60.33	NA	NA	NA	NA		lissa	2	10	-15.1022	19.907	0.0572
L19-2	b	L19		field	NA	18	22-Jun	2016	04-Jun	475	86.2	NA	NA	59.2	NA	NA	NA	NA		lissa	2	10	-15.1022	19.907	0.0572
L19-2	b	L19		field	NA	16	20-Jun	2016	04-Jun	390	85.1	NA	NA	58.9	NA	NA	NA	NA		lissa	2	10	-15.1022	19.907	0.0572
L19-2	b	L19		field	NA	11	15-Jun	2016	04-Jun	344	75	NA	NA	49	NA	NA	NA	NA		lissa	2	10	-15.1022	19.907	0.0572
L19-2	c	L19		field	NA	27	01-Jul	2016	04-Jun	475	94.4	NA	NA	63.5	NA	NA	NA	NA		lissa	2	10	-14.8758	20.6498	0.0486
L19-2	c	L19		field	NA	25	29-Jun	2016	04-Jun	472	93.53	NA	NA	63.57	NA	NA	NA	NA		lissa	2	10	-14.8758	20.6498	0.0486
L19-2	c	L19		field	NA	23	27-Jun	2016	04-Jun	515	91.7	NA	NA	62.1	NA	NA	NA	NA		lissa	2	10	-14.8758	20.6498	0.0486
L19-3	a	L19		field	NA	3	08-Jun	2016	05-Jun	77	51.85	NA	NA	25.31	NA	NA	NA	NA		lissa	3	11	NA	NA	NA
L19-3	a	L19		field	NA	1	06-Jun	2016	05-Jun	48	46.6	NA	NA	24.4	NA	NA	NA	NA	1d - eigen	lissa	3	11	NA	NA	NA
L19-3	a	L19		field	NA	8	13-Jun	2016	05-Jun	130	60.7	NA	NA	34	NA	NA	NA	NA		lissa	3	11	NA	NA	NA
L19-3	a	L19		field	NA	10	15-Jun	2016	05-Jun	191	66.5	NA	NA	36.8	NA	NA	NA	NA		lissa	3	11	NA	NA	NA
L19-3	a	L19		field	NA	5	10-Jun	2016	05-Jun	96	56.1	NA	NA	31	NA	NA	NA	NA		lissa	3	11	NA	NA	NA
L19-3	b	L19		field	NA	17	22-Jun	2016	05-Jun	269	77.2	NA	NA	47.5	NA	NA	NA	NA		lissa	3	11	NA	NA	NA
L19-3	b	L19		field	NA	19	24-Jun	2016	05-Jun	299	79.91	NA	NA	50.92	NA	NA	NA	NA		lissa	3	11	NA	NA	NA
L19-3	b	L19		field	NA	12	17-Jun	2016	05-Jun	NA	71.8	NA	NA	43.4	NA	NA	NA	NA		lissa	3	11	NA	NA	NA
L19-3	b	L19		field	NA	15	20-Jun	2016	05-Jun	236	76.7	NA	NA	47.7	NA	NA	NA	NA		lissa	3	11	NA	NA	NA
L2-1	a	L2		field	NA	8	13-Jun	2016	05-Jun	80	55	NA	NA	30.4	NA	NA	NA	NA		lissa	1	11	-14.7897	20.2139	0.0523856
L2-1	a	L2		field	NA	10	15-Jun	2016	05-Jun	137	59.1	NA	NA	35.4	NA	NA	NA	NA		lissa	1	11	-14.7897	20.2139	0.0523856
L2-1	b	L2		field	NA	15	20-Jun	2016	05-Jun	291	71.5	NA	NA	44.3	NA	NA	NA	NA		lissa	1	11	-15.4311	19.6381	0.061927
L2-1	b	L2		field	NA	12	17-Jun	2016	05-Jun	179	65	NA	NA	39.4	NA	NA	NA	NA		lissa	1	11	-15.4311	19.6381	0.061927
L2-1	b	L2		field	NA	19	24-Jun	2016	05-Jun	371	81.06	NA	NA	51.73	NA	NA	NA	NA		lissa	1	11	-15.4311	19.6381	0.061927
L2-1	b	L2		field	NA	17	22-Jun	2016	05-Jun	341	77	NA	NA	49.5	NA	NA	NA	NA		lissa	1	11	-15.4311	19.6381	0.061927
L2-1	c	L2		field	NA	24	29-Jun	2016	05-Jun	469	87.9	NA	NA	55.34	NA	NA	NA	NA		lissa	1	11	-15.7369	19.0552	0.0710121
L2-1	c	L2		field	NA	26	01-Jul	2016	05-Jun	513	89.4	NA	NA	56.8	NA	NA	NA	NA		lissa	1	11	-15.7369	19.0552	0.0710121
L2-1	c	L2		field	NA	29	04-Jul	2016	05-Jun	602	93.5	NA	NA	59	NA	NA	NA	NA		lissa	1	11	-15.7369	19.0552	0.0710121
L2-1	c	L2		field	NA	22	27-Jun	2016	05-Jun	487	84.3	NA	NA	54.6	NA	NA	NA	NA		lissa	1	11	-15.7369	19.0552	0.0710121
L2-1	NA	L2		field	NA	38	13-Jul	2016	05-Jun	672	102.33	NA	NA	59.47	NA	NA	NA	NA	A.WOD (l/u)	lissa	1	11	NA	NA	NA
L2-1	NA	L2		field	NA	31	06-Jul	2016	05-Jun	603	96.74	NA	NA	58.72	NA	NA	NA	NA		lissa	1	11	NA	NA	NA
L2-1	NA	L2		field	NA	33	08-Jul	2016	05-Jun	681	99.1	NA	NA	59.7	NA	NA	NA	NA		lissa	1	11	NA	NA	NA
L2-2	a	L2		field	NA	1	10-Jun	2016	09-Jun	59	47	NA	NA	27.9	NA	NA	NA	NA	1d - eigen	lissa	2	15	-15.3159	20.7944	0.0488
L2-2	a	L2		field	NA	8	17-Jun	2016	09-Jun	221	67.7	NA	NA	43.1	NA	NA	NA	NA		lissa	2	15	-15.3159	20.7944	0.0488
L2-2	a	L2		field	NA	4	13-Jun	2016	09-Jun	87	57.1	NA	NA	32.8	NA	NA	NA	NA		lissa	2	15	-15.3159	20.7944	0.0488
L2-2	a	L2		field	NA	6	15-Jun	2016	09-Jun	157	61.8	NA	NA	37.7	NA	NA	NA	NA		lissa	2	15	-15.3159	20.7944	0.0488
L2-2	b	L2		field	NA	13	22-Jun	2016	09-Jun	406	80.6	NA	NA	51.5	NA	NA	NA	NA		lissa	2	15	-15.3206	19.9825	0.0566
L2-2	b	L2		field	NA	20	29-Jun	2016	09-Jun	683	93.12	NA	NA	63.44	NA	NA	NA	NA		lissa	2	15	-15.3206	19.9825	0.0566
L2-2	b	L2		field	NA	15	24-Jun	2016	09-Jun	452	85.36	NA	NA	58.51	NA	NA	NA	NA		lissa	2	15	-15.3206	19.9825	0.0566
L2-2	b	L2		field	NA	18	27-Jun	2016	09-Jun	588	90.5	NA	NA	58.1	NA	NA	NA	NA		lissa	2	15	-15.3206	19.9825	0.0566
L2-2	b	L2		field	NA	11	20-Jun	2016	09-Jun	360	75.4	NA	NA	50.1	NA	NA	NA	NA		lissa	2	15	-15.3206	19.9825	0.0566
L2-2	c	L2		field	NA	22	01-Jul	2016	09-Jun	654	97.1	NA	NA	63.9	NA	NA	NA	NA		lissa	2	15	-15.6256	18.8772	0.0734548
L2-2	c	L2		field	NA	27	06-Jul	2016	09-Jun	780	103.72	NA	NA	67.48	NA	NA	NA	NA		lissa	2	15	-15.6256	18.8772	0.0734548
L2-2	c	L2		field	NA	29	08-Jul	2016	09-Jun	855	107	NA	NA	66.8	NA	NA	NA	NA		lissa	2	15	-15.6256	18.8772	0.0734548
L2-2	c	L2		field	NA	25	04-Jul	2016	09-Jun	700	100.5	NA	NA	64.2	NA	NA	NA	NA		lissa	2	15	-15.6256	18.8772	0.0734548
L2-2	NA	L2		field	NA	34	13-Jul	2016	09-Jun	890	110.43	NA	NA	67.1	NA	NA	NA	NA	APO.C (l/u)	lissa	2	15	NA	NA	NA
L20-1	a	L20		field	NA	7	20-Jun	2016	13-Jun	123	56.8	NA	NA	34.3	NA	NA	NA	NA		lissa	1	19	-15.8021	19.245	0.0700379
L20-1	a	L20		field	NA	4	17-Jun	2016	13-Jun	NA	49	NA	NA	24.7	NA	NA	NA	NA		lissa	1	19	-15.8021	19.245	0.0700379
L20-1	a	L20		field	NA	9	22-Jun	2016	13-Jun	188	63.3	NA	NA	34.4	NA	NA	NA	NA		lissa	1	19	-15.8021	19.245	0.0700379
L20-1	b	L20		field	NA	16	29-Jun	2016	13-Jun	419	77.31	NA	NA	48.08	NA	NA	NA	NA		lissa	1	19	-15.3216	19.654	0.061028
L20-1	b	L20		field	NA	18	01-Jul	2016	13-Jun	413	81.1	NA	NA	50.3	NA	NA	NA	NA		lissa	1	19	-15.3216	19.654	0.061028
L20-1	b	L20		field	NA	11	24-Jun	2016	13-Jun	231	76.89	NA	NA	40.49	NA	NA	NA	NA		lissa	1	19	-15.3216	19.654	0.061028
L20-1	b	L20		field	NA	14	27-Jun	2016	13-Jun	324	73.8	NA	NA	49.2	NA	NA	NA	NA		lissa	1	19	-15.3216	19.654	0.061028
L20-1	c	L20		field	NA	23	06-Jul	2016	13-Jun	560	88.08	NA	NA	55.46	NA	NA	NA	NA		lissa	1	19	-15.599	19.5762	0.0641175
L20-1	c	L20		field	NA	30	13-Jul	2016	13-Jun	641	96.86	NA	NA	58.68	NA	NA	NA	NA	A.XOZ (r/u)	lissa	1	19	-15.599	19.5762	0.0641175
L20-1	c	L20		field	NA	25	08-Jul	2016	13-Jun	612	90.7	NA	NA	56.4	NA	NA	NA	NA		lissa	1	19	-15.599	19.5762	0.0641175
L20-1	c	L20		field	NA	21	04-Jul	2016	13-Jun	450	85.6	NA	NA	54.6	NA	NA	NA	NA		lissa	1	19	-15.599	19.5762	0.0641175
L20-2	a	L20		field	NA	1	15-Jun	2016	14-Jun	57	49	NA	NA	28.3	NA	NA	NA	NA	1d - eigen	lissa	2	20	-15.8346	19.4856	0.0658482
L20-2	a	L20		field	NA	8	22-Jun	2016	14-Jun	202	66	NA	NA	37.7	NA	NA	NA	NA		lissa	2	20	-15.8346	19.4856	0.0658482
L20-2	a	L20		field	NA	10	24-Jun	2016	14-Jun	248	76.94	NA	NA	42.1	NA	NA	NA	NA		lissa	2	20	-15.8346	19.4856	0.0658482
L20-2	a	L20		field	NA	3	17-Jun	2016	14-Jun	NA	51.6	NA	NA	28.2	NA	NA	NA	NA		lissa	2	20	-15.8346	19.4856	0.0658482
L20-2	a	L20		field	NA	6	20-Jun	2016	14-Jun	137	60.2	NA	NA	36.3	NA	NA	NA	NA		lissa	2	20	-15.8346	19.4856	0.0658482
L20-2	b	L20		field	NA	15	29-Jun	2016	14-Jun	473	81.75	NA	NA	50.85	NA	NA	NA	NA		lissa	2	20	-15.2735	19.6235	0.060698
L20-2	b	L20		field	NA	17	01-Jul	2016	14-Jun	556	85.4	NA	NA	53.6	NA	NA	NA	NA		lissa	2	20	-15.2735	19.6235	0.060698
L20-2	b	L20		field	NA	13	27-Jun	2016	14-Jun	378	77.7	NA	NA	49	NA	NA	NA	NA		lissa	2	20	-15.2735	19.6235	0.060698
L20-2	b	L20		field	NA	20	04-Jul	2016	14-Jun	613	91.1	NA	NA	56.2	NA	NA	NA	NA		lissa	2	20	-15.2735	19.6235	0.060698
L20-2	c	L20		field	NA	22	06-Jul	2016	14-Jun	652	93.73	NA	NA	59.5	NA	NA	NA	NA		lissa	2	20	-15.8041	19.2983	0.067956
L20-2	c	L20		field	NA	29	13-Jul	2016	14-Jun	825	102.97	NA	NA	61.76	NA	NA	NA	NA	A.MOA (r/u)	lissa	2	20	-15.8041	19.2983	0.067956
L20-2	c	L20		field	NA	24	08-Jul	2016	14-Jun	640	96.3	NA	NA	61.2	NA	NA	NA	NA		lissa	2	20	-15.8041	19.2983	0.067956
L3-1	a	L3		field	NA	6	10-Jun	2016	04-Jun	170	65.1	NA	NA	37.8	NA	NA	NA	NA		lissa	2	10	-16.5486	19.818	0.0643574
L3-1	a	L3		field	NA	9	13-Jun	2016	04-Jun	284	70.6	NA	NA	45.9	NA	NA	NA	NA		lissa	2	10	-16.5486	19.818	0.0643574
L3-1	a	L3		field	NA	2	06-Jun	2016	04-Jun	89	53.56	NA	NA	29.7	NA	NA	NA	NA	2d - eigen	lissa	2	10	-16.5486	19.818	0.0643574
L3-1	a	L3		field	NA	4	08-Jun	2016	04-Jun	133	58.9	NA	NA	35.7	NA	NA	NA	NA		lissa	2	10	-16.5486	19.818	0.0643574
L3-1	b	L3		field	NA	13	17-Jun	2016	04-Jun	421	80.5	NA	NA	54.4	NA	NA	NA	NA		lissa	2	10	-16.6059	18.3578	0.0920877
L3-1	b	L3		field	NA	18	22-Jun	2016	04-Jun	553	87.8	NA	NA	56.2	NA	NA	NA	NA		lissa	2	10	-16.6059	18.3578	0.0920877
L3-1	b	L3		field	NA	20	24-Jun	2016	04-Jun	521	90.56	NA	NA	63.27	NA	NA	NA	NA		lissa	2	10	-16.6059	18.3578	0.0920877
L3-1	b	L3		field	NA	11	15-Jun	2016	04-Jun	339	76.6	NA	NA	50.8	NA	NA	NA	NA		lissa	2	10	-16.6059	18.3578	0.0920877
L3-1	b	L3		field	NA	16	20-Jun	2016	04-Jun	522	85.6	NA	NA	58	NA	NA	NA	NA		lissa	2	10	-16.6059	18.3578	0.0920877
L3-1	c	L3		field	NA	30	04-Jul	2016	04-Jun	522	97.6	NA	NA	64.5	NA	NA	NA	NA		lissa	2	10	-16.7441	18.6939	0.0857214
L3-1	c	L3		field	NA	25	29-Jun	2016	04-Jun	504	94.95	NA	NA	63.56	NA	NA	NA	NA		lissa	2	10	-16.7441	18.6939	0.0857214
L3-1	c	L3		field	NA	23	27-Jun	2016	04-Jun	560	93	NA	NA	62.1	NA	NA	NA	NA		lissa	2	10	-16.7441	18.6939	0.0857214
L3-1	c	L3		field	NA	27	01-Jul	2016	04-Jun	560	96	NA	NA	62.5	NA	NA	NA	NA	ANO.G (r/u)	lissa	2	10	-16.7441	18.6939	0.0857214
L3-1	NA	L3		field	NA	34	08-Jul	2016	04-Jun	456	98.7	NA	NA	64.3	NA	NA	NA	NA		lissa	2	10	NA	NA	NA
L3-1	NA	L3		field	NA	32	06-Jul	2016	04-Jun	486	98.32	NA	NA	62.86	NA	NA	NA	NA		lissa	2	10	NA	NA	NA
L3-2	a	L3		field	NA	7	10-Jun	2016	03-Jun	183	64.2	NA	NA	35.5	NA	NA	NA	NA		lissa	1	9	-16.4655	18.9671	0.07865
L3-2	a	L3		field	NA	5	08-Jun	2016	03-Jun	144	58.9	NA	NA	34.4	NA	NA	NA	NA		lissa	1	9	-16.4655	18.9671	0.07865
L3-2	a	L3		field	NA	10	13-Jun	2016	03-Jun	240	70.1	NA	NA	44.4	NA	NA	NA	NA		lissa	1	9	-16.4655	18.9671	0.07865
L3-2	a	L3		field	NA	3	06-Jun	2016	03-Jun	94	52.43	NA	NA	28.99	NA	NA	NA	NA	3d - eigen	lissa	1	9	-16.4655	18.9671	0.07865
L3-2	b	L3		field	NA	17	20-Jun	2016	03-Jun	523	83.8	NA	NA	55.9	NA	NA	NA	NA		lissa	1	9	-16.7329	20.0163	0.0634333
L3-2	b	L3		field	NA	14	17-Jun	2016	03-Jun	430	77.9	NA	NA	52.4	NA	NA	NA	NA		lissa	1	9	-16.7329	20.0163	0.0634333
L3-2	b	L3		field	NA	12	15-Jun	2016	03-Jun	295	72.4	NA	NA	43.4	NA	NA	NA	NA		lissa	1	9	-16.7329	20.0163	0.0634333
L3-2	b	L3		field	NA	19	22-Jun	2016	03-Jun	582	86.8	NA	NA	59.5	NA	NA	NA	NA		lissa	1	9	-16.7329	20.0163	0.0634333
L3-2	c	L3		field	NA	26	29-Jun	2016	03-Jun	612	96.23	NA	NA	64.46	NA	NA	NA	NA		lissa	1	9	-16.8647	18.2251	0.096685
L3-2	c	L3		field	NA	28	01-Jul	2016	03-Jun	619	97.7	NA	NA	64	NA	NA	NA	NA	ASO.N (r/u)	lissa	1	9	-16.8647	18.2251	0.096685
L3-2	c	L3		field	NA	21	24-Jun	2016	03-Jun	541	90.06	NA	NA	61.98	NA	NA	NA	NA		lissa	1	9	-16.8647	18.2251	0.096685
L3-2	c	L3		field	NA	24	27-Jun	2016	03-Jun	675	94.3	NA	NA	64.3	NA	NA	NA	NA		lissa	1	9	-16.8647	18.2251	0.096685
L3-2	NA	L3		field	NA	31	04-Jul	2016	03-Jun	595	99.2	NA	NA	65.2	NA	NA	NA	NA		lissa	1	9	NA	NA	NA
L3-2	NA	L3		field	NA	40	13-Jul	2016	03-Jun	479	102.72	NA	NA	65.49	NA	NA	NA	NA		lissa	1	9	NA	NA	NA
L3-2	NA	L3		field	NA	33	06-Jul	2016	03-Jun	592	100.65	NA	NA	65.53	NA	NA	NA	NA		lissa	1	9	NA	NA	NA
L3-2	NA	L3		field	NA	35	08-Jul	2016	03-Jun	592	102	NA	NA	66.5	NA	NA	NA	NA		lissa	1	9	NA	NA	NA
L3-3	a	L3		field	NA	3	08-Jun	2016	05-Jun	72	50.7	NA	NA	27.6	NA	NA	NA	NA		lissa	3	11	-16.1143	19.8591	0.0621647
L3-3	a	L3		field	NA	10	15-Jun	2016	05-Jun	238	66.2	NA	NA	40.3	NA	NA	NA	NA		lissa	3	11	-16.1143	19.8591	0.0621647
L3-3	a	L3		field	NA	8	13-Jun	2016	05-Jun	171	63.6	NA	NA	37.7	NA	NA	NA	NA		lissa	3	11	-16.1143	19.8591	0.0621647
L3-3	a	L3		field	NA	5	10-Jun	2016	05-Jun	104	55.2	NA	NA	29.4	NA	NA	NA	NA		lissa	3	11	-16.1143	19.8591	0.0621647
L3-3	a	L3		field	NA	1	06-Jun	2016	05-Jun	47	45.42	NA	NA	25.18	NA	NA	NA	NA	1d - eigen	lissa	3	11	-16.1143	19.8591	0.0621647
L3-3	b	L3		field	NA	15	20-Jun	2016	05-Jun	372	73.4	NA	NA	50	NA	NA	NA	NA		lissa	3	11	-16.6061	19.0934	0.0778273
L3-3	b	L3		field	NA	19	24-Jun	2016	05-Jun	449	82.36	NA	NA	55.73	NA	NA	NA	NA		lissa	3	11	-16.6061	19.0934	0.0778273
L3-3	b	L3		field	NA	17	22-Jun	2016	05-Jun	430	78.6	NA	NA	53.2	NA	NA	NA	NA		lissa	3	11	-16.6061	19.0934	0.0778273
L3-3	c	L3		field	NA	22	27-Jun	2016	05-Jun	512	85	NA	NA	56.4	NA	NA	NA	NA		lissa	3	11	-17.1072	18.2379	0.100098
L3-3	c	L3		field	NA	29	04-Jul	2016	05-Jun	506	90.1	NA	NA	58	NA	NA	NA	NA		lissa	3	11	-17.1072	18.2379	0.100098
L3-3	c	L3		field	NA	24	29-Jun	2016	05-Jun	483	87.03	NA	NA	58.4	NA	NA	NA	NA		lissa	3	11	-17.1072	18.2379	0.100098
L3-3	c	L3		field	NA	26	01-Jul	2016	05-Jun	507	88.5	NA	NA	58.1	NA	NA	NA	NA		lissa	3	11	-17.1072	18.2379	0.100098
L3-3	NA	L3		field	NA	31	06-Jul	2016	05-Jun	517	91.64	NA	NA	59.02	NA	NA	NA	NA		lissa	3	11	NA	NA	NA
L3-3	NA	L3		field	NA	33	08-Jul	2016	05-Jun	498	92.3	NA	NA	60.2	NA	NA	NA	NA		lissa	3	11	NA	NA	NA
L4-1	a	L4		field	NA	5	10-Jun	2016	05-Jun	96	56.8	NA	NA	31.4	NA	NA	NA	NA		lissa	1	11	NA	NA	NA
L4-1	a	L4		field	NA	8	13-Jun	2016	05-Jun	138	61.8	NA	NA	38.3	NA	NA	NA	NA		lissa	1	11	NA	NA	NA
L4-1	a	L4		field	NA	10	15-Jun	2016	05-Jun	172	66.3	NA	NA	38.4	NA	NA	NA	NA		lissa	1	11	NA	NA	NA
L4-1	a	L4		field	NA	3	08-Jun	2016	05-Jun	68	50.6	NA	NA	29.8	NA	NA	NA	NA		lissa	1	11	NA	NA	NA
L4-1	b	L4		field	NA	12	17-Jun	2016	05-Jun	180	69.8	NA	NA	41.6	NA	NA	NA	NA		lissa	1	11	NA	NA	NA
L4-1	b	L4		field	NA	15	20-Jun	2016	05-Jun	318	75.8	NA	NA	47.9	NA	NA	NA	NA		lissa	1	11	NA	NA	NA
L4-1	b	L4		field	NA	17	22-Jun	2016	05-Jun	373	77.3	NA	NA	50.4	NA	NA	NA	NA		lissa	1	11	NA	NA	NA
L4-1	b	L4		field	NA	19	24-Jun	2016	05-Jun	405	81.51	NA	NA	50.88	NA	NA	NA	NA		lissa	1	11	NA	NA	NA
L4-1	c	L4		field	NA	22	27-Jun	2016	05-Jun	543	87.5	NA	NA	54.8	NA	NA	NA	NA		lissa	1	11	NA	NA	NA
L4-1	c	L4		field	NA	26	01-Jul	2016	05-Jun	656	94.9	NA	NA	62.2	NA	NA	NA	NA		lissa	1	11	NA	NA	NA
L4-1	c	L4		field	NA	29	04-Jul	2016	05-Jun	680	99.2	NA	NA	64.1	NA	NA	NA	NA		lissa	1	11	NA	NA	NA
L4-1	c	L4		field	NA	24	29-Jun	2016	05-Jun	652	92.67	NA	NA	58.95	NA	NA	NA	NA		lissa	1	11	NA	NA	NA
L4-1	NA	L4		field	NA	38	13-Jul	2016	05-Jun	604	107.32	NA	NA	65.21	NA	NA	NA	NA	A.UOT (r/u)	lissa	1	11	NA	NA	NA
L4-1	NA	L4		field	NA	31	06-Jul	2016	05-Jun	746	101.88	NA	NA	66.04	NA	NA	NA	NA		lissa	1	11	NA	NA	NA
L4-1	NA	L4		field	NA	33	08-Jul	2016	05-Jun	776	102.5	NA	NA	65.6	NA	NA	NA	NA		lissa	1	11	NA	NA	NA
L4-2	a	L4		field	NA	8	13-Jun	2016	05-Jun	165	62.7	NA	NA	35.9	NA	NA	NA	NA		lissa	2	11	-18.6035	16.4845	0.18216
L4-2	a	L4		field	NA	5	10-Jun	2016	05-Jun	105	55.8	NA	NA	30.4	NA	NA	NA	NA		lissa	2	11	-18.6035	16.4845	0.18216
L4-2	a	L4		field	NA	1	06-Jun	2016	05-Jun	NA	46.44	NA	NA	25.03	NA	NA	NA	NA	1d - eigen	lissa	2	11	-18.6035	16.4845	0.18216
L4-2	a	L4		field	NA	3	08-Jun	2016	05-Jun	73	49.7	NA	NA	28.1	NA	NA	NA	NA		lissa	2	11	-18.6035	16.4845	0.18216
L4-2	a	L4		field	NA	10	15-Jun	2016	05-Jun	221	67	NA	NA	42.6	NA	NA	NA	NA		lissa	2	11	-18.6035	16.4845	0.18216
L4-2	b	L4		field	NA	12	17-Jun	2016	05-Jun	249	72.3	NA	NA	41.9	NA	NA	NA	NA		lissa	2	11	-17.3352	18.1341	0.104577
L4-2	b	L4		field	NA	17	22-Jun	2016	05-Jun	456	81.4	NA	NA	49.5	NA	NA	NA	NA		lissa	2	11	-17.3352	18.1341	0.104577
L4-2	b	L4		field	NA	15	20-Jun	2016	05-Jun	390	78.2	NA	NA	49.5	NA	NA	NA	NA		lissa	2	11	-17.3352	18.1341	0.104577
L4-2	b	L4		field	NA	19	24-Jun	2016	05-Jun	509	85.02	NA	NA	53.03	NA	NA	NA	NA		lissa	2	11	-17.3352	18.1341	0.104577
L4-2	c	L4		field	NA	26	01-Jul	2016	05-Jun	620	94.3	NA	NA	55.6	NA	NA	NA	NA		lissa	2	11	-18.2766	16.4299	0.178306
L4-2	c	L4		field	NA	24	29-Jun	2016	05-Jun	635	92.15	NA	NA	58.71	NA	NA	NA	NA		lissa	2	11	-18.2766	16.4299	0.178306
L4-2	c	L4		field	NA	22	27-Jun	2016	05-Jun	555	88.2	NA	NA	56.6	NA	NA	NA	NA		lissa	2	11	-18.2766	16.4299	0.178306
L4-2	c	L4		field	NA	29	04-Jul	2016	05-Jun	629	96.4	NA	NA	59.4	NA	NA	NA	NA	AZO.V (r/u)	lissa	2	11	-18.2766	16.4299	0.178306
L4-2	NA	L4		field	NA	31	06-Jul	2016	05-Jun	680	99.33	NA	NA	60.05	NA	NA	NA	NA		lissa	2	11	NA	NA	NA
L4-2	NA	L4		field	NA	38	13-Jul	2016	05-Jun	676	105.35	NA	NA	60.02	NA	NA	NA	NA		lissa	2	11	NA	NA	NA
L4-2	NA	L4		field	NA	33	08-Jul	2016	05-Jun	644	100.7	NA	NA	58.8	NA	NA	NA	NA		lissa	2	11	NA	NA	NA
L4-3	a	L4		field	NA	10	15-Jun	2016	05-Jun	146	60.6	NA	NA	32.5	NA	NA	NA	NA		lissa	3	11	-17.432	17.6518	0.118221
L4-3	a	L4		field	NA	3	08-Jun	2016	05-Jun	48	47.5	NA	NA	25.6	NA	NA	NA	NA		lissa	3	11	-17.432	17.6518	0.118221
L4-3	a	L4		field	NA	5	10-Jun	2016	05-Jun	71	51.8	NA	NA	27	NA	NA	NA	NA		lissa	3	11	-17.432	17.6518	0.118221
L4-3	a	L4		field	NA	8	13-Jun	2016	05-Jun	97	56.2	NA	NA	31.6	NA	NA	NA	NA		lissa	3	11	-17.432	17.6518	0.118221
L4-3	b	L4		field	NA	19	24-Jun	2016	05-Jun	355	76.9	NA	NA	47.69	NA	NA	NA	NA		lissa	3	11	-18.1056	17.0603	0.149021
L4-3	b	L4		field	NA	15	20-Jun	2016	05-Jun	267	70.8	NA	NA	41.7	NA	NA	NA	NA		lissa	3	11	-18.1056	17.0603	0.149021
L4-3	b	L4		field	NA	12	17-Jun	2016	05-Jun	171	64.9	NA	NA	37	NA	NA	NA	NA		lissa	3	11	-18.1056	17.0603	0.149021
L4-3	b	L4		field	NA	17	22-Jun	2016	05-Jun	332	73.6	NA	NA	44.6	NA	NA	NA	NA		lissa	3	11	-18.1056	17.0603	0.149021
L4-3	c	L4		field	NA	29	04-Jul	2016	05-Jun	528	89.1	NA	NA	56	NA	NA	NA	NA		lissa	3	11	-19.5248	14.0977	0.344987
L4-3	c	L4		field	NA	24	29-Jun	2016	05-Jun	504	84.97	NA	NA	54.26	NA	NA	NA	NA		lissa	3	11	-19.5248	14.0977	0.344987
L4-3	c	L4		field	NA	26	01-Jul	2016	05-Jun	518	86	NA	NA	53.6	NA	NA	NA	NA		lissa	3	11	-19.5248	14.0977	0.344987
L4-3	c	L4		field	NA	22	27-Jun	2016	05-Jun	447	80.5	NA	NA	53.5	NA	NA	NA	NA		lissa	3	11	-19.5248	14.0977	0.344987
L4-3	NA	L4		field	NA	38	13-Jul	2016	05-Jun	471	97.45	NA	NA	58.52	NA	NA	NA	NA	A.NOZ (r/u)	lissa	3	11	NA	NA	NA
L4-3	NA	L4		field	NA	31	06-Jul	2016	05-Jun	579	92.55	NA	NA	57.02	NA	NA	NA	NA		lissa	3	11	NA	NA	NA
L4-3	NA	L4		field	NA	33	08-Jul	2016	05-Jun	594	93.3	NA	NA	57.8	NA	NA	NA	NA		lissa	3	11	NA	NA	NA
L5-1	a	L5		field	NA	10	15-Jun	2016	05-Jun	246	69.4	NA	NA	42.1	NA	NA	NA	NA		lissa	1	11	-15.0392	21.3091	0.0436
L5-1	a	L5		field	NA	5	10-Jun	2016	05-Jun	125	68	NA	NA	31.6	NA	NA	NA	NA		lissa	1	11	-15.0392	21.3091	0.0436
L5-1	a	L5		field	NA	1	06-Jun	2016	05-Jun	57	47.42	NA	NA	25.78	NA	NA	NA	NA	1d - eigen	lissa	1	11	-15.0392	21.3091	0.0436
L5-1	a	L5		field	NA	3	08-Jun	2016	05-Jun	82	53.2	NA	NA	29.7	NA	NA	NA	NA		lissa	1	11	-15.0392	21.3091	0.0436
L5-1	a	L5		field	NA	8	13-Jun	2016	05-Jun	199	64.5	NA	NA	39.7	NA	NA	NA	NA		lissa	1	11	-15.0392	21.3091	0.0436
L5-1	b	L5		field	NA	17	22-Jun	2016	05-Jun	438	83.2	NA	NA	54.8	NA	NA	NA	NA		lissa	1	11	-15.5785	20.1926	0.0564614
L5-1	b	L5		field	NA	12	17-Jun	2016	05-Jun	304	74.9	NA	NA	45.6	NA	NA	NA	NA		lissa	1	11	-15.5785	20.1926	0.0564614
L5-1	b	L5		field	NA	19	24-Jun	2016	05-Jun	489	85.75	NA	NA	56	NA	NA	NA	NA		lissa	1	11	-15.5785	20.1926	0.0564614
L5-1	b	L5		field	NA	15	20-Jun	2016	05-Jun	415	80.2	NA	NA	49.9	NA	NA	NA	NA		lissa	1	11	-15.5785	20.1926	0.0564614
L5-1	c	L5		field	NA	22	27-Jun	2016	05-Jun	531	89.4	NA	NA	58	NA	NA	NA	NA		lissa	1	11	-15.7438	19.4422	0.0665669
L5-1	c	L5		field	NA	26	01-Jul	2016	05-Jun	643	93.8	NA	NA	57	NA	NA	NA	NA		lissa	1	11	-15.7438	19.4422	0.0665669
L5-1	c	L5		field	NA	29	04-Jul	2016	05-Jun	679	98.4	NA	NA	58.1	NA	NA	NA	NA	APO.V (l/u)	lissa	1	11	-15.7438	19.4422	0.0665669
L5-1	c	L5		field	NA	24	29-Jun	2016	05-Jun	536	92.39	NA	NA	57.23	NA	NA	NA	NA		lissa	1	11	-15.7438	19.4422	0.0665669
L5-1	NA	L5		field	NA	31	06-Jul	2016	05-Jun	680	100.45	NA	NA	56.67	NA	NA	NA	NA		lissa	1	11	NA	NA	NA
L5-1	NA	L5		field	NA	38	13-Jul	2016	05-Jun	707	105.29	NA	NA	57.41	NA	NA	NA	NA		lissa	1	11	NA	NA	NA
L5-1	NA	L5		field	NA	33	08-Jul	2016	05-Jun	662	102.3	NA	NA	57.3	NA	NA	NA	NA		lissa	1	11	NA	NA	NA
L5-2	a	L5		field	NA	1	06-Jun	2016	05-Jun	58	48.15	NA	NA	27.01	NA	NA	NA	NA	1d - eigen	lissa	2	11	-14.9592	21.327	0.0432
L5-2	a	L5		field	NA	3	08-Jun	2016	05-Jun	88	53.5	NA	NA	29	NA	NA	NA	NA		lissa	2	11	-14.9592	21.327	0.0432
L5-2	a	L5		field	NA	10	15-Jun	2016	05-Jun	317	72.8	NA	NA	45.5	NA	NA	NA	NA		lissa	2	11	-14.9592	21.327	0.0432
L5-2	a	L5		field	NA	5	10-Jun	2016	05-Jun	129	59.6	NA	NA	33.9	NA	NA	NA	NA		lissa	2	11	-14.9592	21.327	0.0432
L5-2	a	L5		field	NA	8	13-Jun	2016	05-Jun	248	68	NA	NA	42.2	NA	NA	NA	NA		lissa	2	11	-14.9592	21.327	0.0432
L5-2	b	L5		field	NA	15	20-Jun	2016	05-Jun	517	84.3	NA	NA	54	NA	NA	NA	NA		lissa	2	11	-15.1246	20.0297	0.0556956
L5-2	b	L5		field	NA	19	24-Jun	2016	05-Jun	663	91.38	NA	NA	61.53	NA	NA	NA	NA		lissa	2	11	-15.1246	20.0297	0.0556956
L5-2	b	L5		field	NA	12	17-Jun	2016	05-Jun	387	78.4	NA	NA	51.6	NA	NA	NA	NA		lissa	2	11	-15.1246	20.0297	0.0556956
L5-2	b	L5		field	NA	17	22-Jun	2016	05-Jun	602	88.4	NA	NA	57.7	NA	NA	NA	NA		lissa	2	11	-15.1246	20.0297	0.0556956
L5-2	c	L5		field	NA	24	29-Jun	2016	05-Jun	685	98.67	NA	NA	63.72	NA	NA	NA	NA		lissa	2	11	-14.9222	20.4769	0.0501
L5-2	c	L5		field	NA	26	01-Jul	2016	05-Jun	792	101.1	NA	NA	62.7	NA	NA	NA	NA		lissa	2	11	-14.9222	20.4769	0.0501
L5-2	c	L5		field	NA	29	04-Jul	2016	05-Jun	836	104.8	NA	NA	64	NA	NA	NA	NA	A.NOP (l/u)	lissa	2	11	-14.9222	20.4769	0.0501
L5-2	c	L5		field	NA	22	27-Jun	2016	05-Jun	681	96.6	NA	NA	60.4	NA	NA	NA	NA		lissa	2	11	-14.9222	20.4769	0.0501
L5-2	NA	L5		field	NA	33	08-Jul	2016	05-Jun	NA	108.1	NA	NA	63.7	NA	NA	NA	NA		lissa	2	11	NA	NA	NA
L5-2	NA	L5		field	NA	31	06-Jul	2016	05-Jun	861	107.13	NA	NA	64.24	NA	NA	NA	NA		lissa	2	11	NA	NA	NA
L5-3	a	L5		field	NA	3	08-Jun	2016	05-Jun	71	49.5	NA	NA	28.1	NA	NA	NA	NA		lissa	3	11	NA	NA	NA
L5-3	a	L5		field	NA	5	10-Jun	2016	05-Jun	89	54.5	NA	NA	30	NA	NA	NA	NA		lissa	3	11	NA	NA	NA
L6-1	a	L6		field	NA	10	15-Jun	2016	05-Jun	154	58.3	NA	NA	34.2	NA	NA	NA	NA		lissa	1	11	NA	NA	NA
L6-1	a	L6		field	NA	5	10-Jun	2016	05-Jun	74	50.3	NA	NA	27.7	NA	NA	NA	NA		lissa	1	11	NA	NA	NA
L6-1	a	L6		field	NA	3	08-Jun	2016	05-Jun	48	46.6	NA	NA	25.1	NA	NA	NA	NA	1d - eigen	lissa	1	11	NA	NA	NA
L6-1	a	L6		field	NA	8	13-Jun	2016	05-Jun	126	56.2	NA	NA	30.4	NA	NA	NA	NA		lissa	1	11	NA	NA	NA
L6-1	b	L6		field	NA	12	17-Jun	2016	05-Jun	180	62.3	NA	NA	33.8	NA	NA	NA	NA		lissa	1	11	NA	NA	NA
L6-1	b	L6		field	NA	15	20-Jun	2016	05-Jun	216	65.9	NA	NA	39.8	NA	NA	NA	NA		lissa	1	11	NA	NA	NA
L6-1	b	L6		field	NA	19	24-Jun	2016	05-Jun	243	70.45	NA	NA	43.06	NA	NA	NA	NA		lissa	1	11	NA	NA	NA
L6-1	b	L6		field	NA	17	22-Jun	2016	05-Jun	229	68.2	NA	NA	40.2	NA	NA	NA	NA		lissa	1	11	NA	NA	NA
L6-1	c	L6		field	NA	24	29-Jun	2016	05-Jun	277	72.61	NA	NA	44.95	NA	NA	NA	NA		lissa	1	11	NA	NA	NA
L6-1	c	L6		field	NA	26	01-Jul	2016	05-Jun	260	74.2	NA	NA	45.6	NA	NA	NA	NA		lissa	1	11	NA	NA	NA
L6-1	c	L6		field	NA	29	04-Jul	2016	05-Jun	280	75.8	NA	NA	46	NA	NA	NA	NA	geen primary getrokken	lissa	1	11	NA	NA	NA
L6-1	c	L6		field	NA	22	27-Jun	2016	05-Jun	203	71.7	NA	NA	44.4	NA	NA	NA	NA		lissa	1	11	NA	NA	NA
L6-2	a	L6		field	NA	10	17-Jun	2016	07-Jun	290	73	NA	NA	44	NA	NA	NA	NA		lissa	2	13	-15.1126	20.0955	0.0553
L6-2	a	L6		field	NA	8	15-Jun	2016	07-Jun	236	68	NA	NA	38.8	NA	NA	NA	NA		lissa	2	13	-15.1126	20.0955	0.0553
L6-2	a	L6		field	NA	3	10-Jun	2016	07-Jun	107	55.8	NA	NA	30.2	NA	NA	NA	NA		lissa	2	13	-15.1126	20.0955	0.0553
L6-2	a	L6		field	NA	1	08-Jun	2016	07-Jun	58	50.3	NA	NA	28	NA	NA	NA	NA	1d - eigen	lissa	2	13	-15.1126	20.0955	0.0553
L6-2	a	L6		field	NA	6	13-Jun	2016	07-Jun	172	63.3	NA	NA	36.4	NA	NA	NA	NA		lissa	2	13	-15.1126	20.0955	0.0553
L6-2	b	L6		field	NA	13	20-Jun	2016	07-Jun	367	77.2	NA	NA	47.8	NA	NA	NA	NA		lissa	2	13	-14.7124	20.087	0.0528
L6-2	b	L6		field	NA	15	22-Jun	2016	07-Jun	437	81.6	NA	NA	50.3	NA	NA	NA	NA		lissa	2	13	-14.7124	20.087	0.0528
L6-2	b	L6		field	NA	20	27-Jun	2016	07-Jun	614	90.7	NA	NA	60.1	NA	NA	NA	NA		lissa	2	13	-14.7124	20.087	0.0528
L6-2	b	L6		field	NA	17	24-Jun	2016	07-Jun	488	84.71	NA	NA	55.86	NA	NA	NA	NA		lissa	2	13	-14.7124	20.087	0.0528
L6-2	c	L6		field	NA	22	29-Jun	2016	07-Jun	697	93.54	NA	NA	61.57	NA	NA	NA	NA		lissa	2	13	-15.4016	18.7081	0.0747892
L6-2	c	L6		field	NA	27	04-Jul	2016	07-Jun	770	101	NA	NA	64.6	NA	NA	NA	NA	A.ROL (l/u)	lissa	2	13	-15.4016	18.7081	0.0747892
L6-2	c	L6		field	NA	24	01-Jul	2016	07-Jun	653	96.4	NA	NA	61.8	NA	NA	NA	NA		lissa	2	13	-15.4016	18.7081	0.0747892
L6-2	c	L6		field	NA	29	06-Jul	2016	07-Jun	805	103.62	NA	NA	66.14	NA	NA	NA	NA		lissa	2	13	-15.4016	18.7081	0.0747892
L6-2	NA	L6		field	NA	36	13-Jul	2016	07-Jun	860	110.67	NA	NA	67.56	NA	NA	NA	NA		lissa	2	13	NA	NA	NA
L6-2	NA	L6		field	NA	31	08-Jul	2016	07-Jun	791	105.5	NA	NA	64.4	NA	NA	NA	NA		lissa	2	13	NA	NA	NA
L6-3	a	L6		field	NA	8	15-Jun	2016	07-Jun	114	57.5	NA	NA	31.4	NA	NA	NA	NA		lissa	3	13	NA	NA	NA
L6-3	a	L6		field	NA	3	10-Jun	2016	07-Jun	66	49.1	NA	NA	27.3	NA	NA	NA	NA		lissa	3	13	NA	NA	NA
L6-3	a	L6		field	NA	6	13-Jun	2016	07-Jun	97	55.9	NA	NA	29.9	NA	NA	NA	NA		lissa	3	13	NA	NA	NA
L6-3	a	L6		field	NA	1	08-Jun	2016	07-Jun	44	46.3	NA	NA	23.8	NA	NA	NA	NA	0d - eigen	lissa	3	13	NA	NA	NA
L6-3	a	L6		field	NA	10	17-Jun	2016	07-Jun	125	61.1	NA	NA	33.8	NA	NA	NA	NA		lissa	3	13	NA	NA	NA
L6-3	b	L6		field	NA	13	20-Jun	2016	07-Jun	123	63.4	NA	NA	34.9	NA	NA	NA	NA		lissa	3	13	NA	NA	NA
L7-1	a	L7		field	NA	9	13-Jun	2016	04-Jun	226	69.3	NA	NA	45.4	NA	NA	NA	NA		lissa	2	10	-15.2986	20.5401	0.0518173
L7-1	a	L7		field	NA	2	06-Jun	2016	04-Jun	96	52.79	NA	NA	30.34	NA	NA	NA	NA	2d - eigen	lissa	2	10	-15.2986	20.5401	0.0518173
L7-1	a	L7		field	NA	4	08-Jun	2016	04-Jun	129	58.1	NA	NA	35	NA	NA	NA	NA		lissa	2	10	-15.2986	20.5401	0.0518173
L7-1	a	L7		field	NA	6	10-Jun	2016	04-Jun	188	64.2	NA	NA	39.5	NA	NA	NA	NA		lissa	2	10	-15.2986	20.5401	0.0518173
L7-1	b	L7		field	NA	20	24-Jun	2016	04-Jun	496	86.43	NA	NA	56.66	NA	NA	NA	NA		lissa	2	10	-15.1546	20.3949	0.0518
L7-1	b	L7		field	NA	16	20-Jun	2016	04-Jun	469	80.6	NA	NA	53.5	NA	NA	NA	NA		lissa	2	10	-15.1546	20.3949	0.0518
L7-1	b	L7		field	NA	18	22-Jun	2016	04-Jun	465	83.7	NA	NA	56.8	NA	NA	NA	NA		lissa	2	10	-15.1546	20.3949	0.0518
L7-1	b	L7		field	NA	11	15-Jun	2016	04-Jun	288	73	NA	NA	49.3	NA	NA	NA	NA		lissa	2	10	-15.1546	20.3949	0.0518
L7-1	b	L7		field	NA	13	17-Jun	2016	04-Jun	332	76.8	NA	NA	51.1	NA	NA	NA	NA		lissa	2	10	-15.1546	20.3949	0.0518
L7-1	c	L7		field	NA	30	04-Jul	2016	04-Jun	480	92.7	NA	NA	61.6	NA	NA	NA	NA		lissa	2	10	-14.649	21.4226	0.0416
L7-1	c	L7		field	NA	27	01-Jul	2016	04-Jun	539	91.5	NA	NA	59.7	NA	NA	NA	NA		lissa	2	10	-14.649	21.4226	0.0416
L7-1	c	L7		field	NA	23	27-Jun	2016	04-Jun	551	88.3	NA	NA	57.7	NA	NA	NA	NA		lissa	2	10	-14.649	21.4226	0.0416
L7-1	c	L7		field	NA	25	29-Jun	2016	04-Jun	552	90.12	NA	NA	58.54	NA	NA	NA	NA		lissa	2	10	-14.649	21.4226	0.0416
L7-1	NA	L7		field	NA	32	06-Jul	2016	04-Jun	547	94.44	NA	NA	59.08	NA	NA	NA	NA		lissa	2	10	NA	NA	NA
L7-1	NA	L7		field	NA	39	13-Jul	2016	04-Jun	594	99.67	NA	NA	59.79	NA	NA	NA	NA	AN.OX (r/u)	lissa	2	10	NA	NA	NA
L7-1	NA	L7		field	NA	34	08-Jul	2016	04-Jun	599	96.5	NA	NA	59.5	NA	NA	NA	NA		lissa	2	10	NA	NA	NA
L7-2	a	L7		field	NA	10	13-Jun	2016	03-Jun	279	72.3	NA	NA	49	NA	NA	NA	NA		lissa	1	9	-16.4015	20.3403	0.0583748
L7-2	a	L7		field	NA	5	08-Jun	2016	03-Jun	158	60.2	NA	NA	36.7	NA	NA	NA	NA		lissa	1	9	-16.4015	20.3403	0.0583748
L7-2	a	L7		field	NA	7	10-Jun	2016	03-Jun	208	66	NA	NA	46	NA	NA	NA	NA		lissa	1	9	-16.4015	20.3403	0.0583748
L7-2	a	L7		field	NA	3	06-Jun	2016	03-Jun	99	54.37	NA	NA	30.52	NA	NA	NA	NA	3d - eigen	lissa	1	9	-16.4015	20.3403	0.0583748
L7-2	b	L7		field	NA	12	15-Jun	2016	03-Jun	333	75.3	NA	NA	51.3	NA	NA	NA	NA		lissa	1	9	-15.4289	20.6089	0.0508
L7-2	b	L7		field	NA	19	22-Jun	2016	03-Jun	563	86.6	NA	NA	60.2	NA	NA	NA	NA		lissa	1	9	-15.4289	20.6089	0.0508
L7-2	b	L7		field	NA	17	20-Jun	2016	03-Jun	530	84.3	NA	NA	58.2	NA	NA	NA	NA		lissa	1	9	-15.4289	20.6089	0.0508
L7-2	b	L7		field	NA	14	17-Jun	2016	03-Jun	383	79.3	NA	NA	53	NA	NA	NA	NA		lissa	1	9	-15.4289	20.6089	0.0508
L7-2	c	L7		field	NA	21	24-Jun	2016	03-Jun	619	89.15	NA	NA	61.61	NA	NA	NA	NA		lissa	1	9	-15.026	19.9992	0.0552496
L7-2	c	L7		field	NA	28	01-Jul	2016	03-Jun	649	95.9	NA	NA	62.4	NA	NA	NA	NA		lissa	1	9	-15.026	19.9992	0.0552496
L7-2	c	L7		field	NA	24	27-Jun	2016	03-Jun	704	93.3	NA	NA	69	NA	NA	NA	NA		lissa	1	9	-15.026	19.9992	0.0552496
L7-2	c	L7		field	NA	26	29-Jun	2016	03-Jun	631	94.92	NA	NA	62.95	NA	NA	NA	NA		lissa	1	9	-15.026	19.9992	0.0552496
L7-2	NA	L7		field	NA	33	06-Jul	2016	03-Jun	671	100	NA	NA	63.33	NA	NA	NA	NA		lissa	1	9	NA	NA	NA
L7-2	NA	L7		field	NA	31	04-Jul	2016	03-Jun	608	98.6	NA	NA	61.4	NA	NA	NA	NA		lissa	1	9	NA	NA	NA
L7-2	NA	L7		field	NA	35	08-Jul	2016	03-Jun	695	102.2	NA	NA	62.4	NA	NA	NA	NA		lissa	1	9	NA	NA	NA
L7-2	NA	L7		field	NA	40	13-Jul	2016	03-Jun	730	104.45	NA	NA	60.2	NA	NA	NA	NA	AZ.OR (r/u)	lissa	1	9	NA	NA	NA
L7-3	a	L7		field	NA	3	08-Jun	2016	05-Jun	89	52.3	NA	NA	29.5	NA	NA	NA	NA		lissa	3	11	-16.2121	20.598	0.0539
L7-3	a	L7		field	NA	8	13-Jun	2016	05-Jun	166	65.1	NA	NA	43.2	NA	NA	NA	NA		lissa	3	11	-16.2121	20.598	0.0539
L7-3	a	L7		field	NA	1	06-Jun	2016	05-Jun	52	47.8	NA	NA	26	NA	NA	NA	NA	1d - eigen	lissa	3	11	-16.2121	20.598	0.0539
L7-3	a	L7		field	NA	5	10-Jun	2016	05-Jun	131	58	NA	NA	32.2	NA	NA	NA	NA		lissa	3	11	-16.2121	20.598	0.0539
L7-3	a	L7		field	NA	10	15-Jun	2016	05-Jun	251	70	NA	NA	44	NA	NA	NA	NA		lissa	3	11	-16.2121	20.598	0.0539
L7-3	b	L7		field	NA	15	20-Jun	2016	05-Jun	400	80.9	NA	NA	55.9	NA	NA	NA	NA		lissa	3	11	-15.4147	19.965	0.0579304
L7-3	b	L7		field	NA	19	24-Jun	2016	05-Jun	536	87.57	NA	NA	61.74	NA	NA	NA	NA		lissa	3	11	-15.4147	19.965	0.0579304
L7-3	b	L7		field	NA	17	22-Jun	2016	05-Jun	478	83.9	NA	NA	56.1	NA	NA	NA	NA		lissa	3	11	-15.4147	19.965	0.0579304
L7-3	b	L7		field	NA	12	17-Jun	2016	05-Jun	291	74.6	NA	NA	48.7	NA	NA	NA	NA		lissa	3	11	-15.4147	19.965	0.0579304
L7-3	c	L7		field	NA	29	04-Jul	2016	05-Jun	580	98.8	NA	NA	65.4	NA	NA	NA	NA		lissa	3	11	-15.3946	20.0144	0.0570276
L7-3	c	L7		field	NA	24	29-Jun	2016	05-Jun	637	93.38	NA	NA	63.31	NA	NA	NA	NA		lissa	3	11	-15.3946	20.0144	0.0570276
L7-3	c	L7		field	NA	22	27-Jun	2016	05-Jun	624	91.6	NA	NA	64.7	NA	NA	NA	NA		lissa	3	11	-15.3946	20.0144	0.0570276
L7-3	c	L7		field	NA	26	01-Jul	2016	05-Jun	663	96.8	NA	NA	65.7	NA	NA	NA	NA		lissa	3	11	-15.3946	20.0144	0.0570276
L7-3	NA	L7		field	NA	33	08-Jul	2016	05-Jun	840	104.3	NA	NA	66.8	NA	NA	NA	NA		lissa	3	11	NA	NA	NA
L7-3	NA	L7		field	NA	38	13-Jul	2016	05-Jun	893	109.71	NA	NA	67.71	NA	NA	NA	NA	AM.OF (r/u)	lissa	3	11	NA	NA	NA
L7-3	NA	L7		field	NA	31	06-Jul	2016	05-Jun	680	101	NA	NA	67.03	NA	NA	NA	NA		lissa	3	11	NA	NA	NA
L8-1	a	L8		field	NA	4	10-Jun	2016	06-Jun	75	51.5	NA	NA	29.9	NA	NA	NA	NA		lissa	2	12	-16.1911	19.1726	0.0735599
L8-1	a	L8		field	NA	2	08-Jun	2016	06-Jun	52	48.6	NA	NA	27.1	NA	NA	NA	NA	2d - eigen	lissa	2	12	-16.1911	19.1726	0.0735599
L8-1	a	L8		field	NA	7	13-Jun	2016	06-Jun	128	56.6	NA	NA	33.3	NA	NA	NA	NA		lissa	2	12	-16.1911	19.1726	0.0735599
L8-1	a	L8		field	NA	9	15-Jun	2016	06-Jun	175	61.6	NA	NA	35.1	NA	NA	NA	NA		lissa	2	12	-16.1911	19.1726	0.0735599
L8-1	b	L8		field	NA	11	17-Jun	2016	06-Jun	183	65.7	NA	NA	39.6	NA	NA	NA	NA		lissa	2	12	-16.3359	17.6776	0.105418
L8-1	b	L8		field	NA	18	24-Jun	2016	06-Jun	355	75.06	NA	NA	51.04	NA	NA	NA	NA		lissa	2	12	-16.3359	17.6776	0.105418
L8-1	b	L8		field	NA	16	22-Jun	2016	06-Jun	315	73.6	NA	NA	46.6	NA	NA	NA	NA		lissa	2	12	-16.3359	17.6776	0.105418
L8-1	b	L8		field	NA	14	20-Jun	2016	06-Jun	288	69.1	NA	NA	43.9	NA	NA	NA	NA		lissa	2	12	-16.3359	17.6776	0.105418
L8-1	c	L8		field	NA	25	01-Jul	2016	06-Jun	533	87	NA	NA	56.2	NA	NA	NA	NA		lissa	2	12	-16.8275	16.6796	0.143283
L8-1	c	L8		field	NA	23	29-Jun	2016	06-Jun	468	83.85	NA	NA	56.12	NA	NA	NA	NA		lissa	2	12	-16.8275	16.6796	0.143283
L8-1	c	L8		field	NA	21	27-Jun	2016	06-Jun	553	81.1	NA	NA	50.2	NA	NA	NA	NA		lissa	2	12	-16.8275	16.6796	0.143283
L8-1	c	L8		field	NA	28	04-Jul	2016	06-Jun	584	90.8	NA	NA	58.8	NA	NA	NA	NA		lissa	2	12	-16.8275	16.6796	0.143283
L8-1	c	L8		field	NA	30	06-Jul	2016	06-Jun	707	93.8	NA	NA	60.34	NA	NA	NA	NA		lissa	2	12	-16.8275	16.6796	0.143283
L8-1	NA	L8		field	NA	32	08-Jul	2016	06-Jun	690	96.5	NA	NA	60	NA	NA	NA	NA		lissa	2	12	NA	NA	NA
L8-1	NA	L8		field	NA	37	13-Jul	2016	06-Jun	686	100.12	NA	NA	60.96	NA	NA	NA	NA	ARO.C (r/u)	lissa	2	12	NA	NA	NA
L8-2	a	L8		field	NA	3	08-Jun	2016	05-Jun	91	56.8	NA	NA	31.4	NA	NA	NA	NA		lissa	1	11	-16.0657	20.0377	0.0600093
L8-2	a	L8		field	NA	8	13-Jun	2016	05-Jun	247	69.3	NA	NA	44.7	NA	NA	NA	NA		lissa	1	11	-16.0657	20.0377	0.0600093
L8-2	a	L8		field	NA	1	06-Jun	2016	05-Jun	66	50.5	NA	NA	27.6	NA	NA	NA	NA	1d - eigen	lissa	1	11	-16.0657	20.0377	0.0600093
L8-2	a	L8		field	NA	10	15-Jun	2016	05-Jun	348	74.4	NA	NA	51	NA	NA	NA	NA		lissa	1	11	-16.0657	20.0377	0.0600093
L8-2	a	L8		field	NA	5	10-Jun	2016	05-Jun	164	61.7	NA	NA	37.8	NA	NA	NA	NA		lissa	1	11	-16.0657	20.0377	0.0600093
L8-2	b	L8		field	NA	17	22-Jun	2016	05-Jun	589	87.5	NA	NA	58.7	NA	NA	NA	NA		lissa	1	11	-16.6965	18.1893	0.0967211
L8-2	b	L8		field	NA	12	17-Jun	2016	05-Jun	371	79.4	NA	NA	52.8	NA	NA	NA	NA		lissa	1	11	-16.6965	18.1893	0.0967211
L8-2	b	L8		field	NA	19	24-Jun	2016	05-Jun	655	91.11	NA	NA	63.92	NA	NA	NA	NA		lissa	1	11	-16.6965	18.1893	0.0967211
L8-2	b	L8		field	NA	15	20-Jun	2016	05-Jun	515	83.7	NA	NA	59.3	NA	NA	NA	NA		lissa	1	11	-16.6965	18.1893	0.0967211
L8-2	c	L8		field	NA	24	29-Jun	2016	05-Jun	674	97.44	NA	NA	66.94	NA	NA	NA	NA		lissa	1	11	-17.3665	15.6196	0.198448
L8-2	c	L8		field	NA	22	27-Jun	2016	05-Jun	622	95.7	NA	NA	65.4	NA	NA	NA	NA		lissa	1	11	-17.3665	15.6196	0.198448
L8-2	c	L8		field	NA	29	04-Jul	2016	05-Jun	767	103.5	NA	NA	66.9	NA	NA	NA	NA	AP.OM (r/u)	lissa	1	11	-17.3665	15.6196	0.198448
L8-2	c	L8		field	NA	26	01-Jul	2016	05-Jun	722	100.5	NA	NA	66.6	NA	NA	NA	NA		lissa	1	11	-17.3665	15.6196	0.198448
L8-2	NA	L8		field	NA	33	08-Jul	2016	05-Jun	806	107.9	NA	NA	67.1	NA	NA	NA	NA		lissa	1	11	NA	NA	NA
L8-2	NA	L8		field	NA	38	13-Jul	2016	05-Jun	769	111.07	NA	NA	67.83	NA	NA	NA	NA		lissa	1	11	NA	NA	NA
L8-2	NA	L8		field	NA	31	06-Jul	2016	05-Jun	823	105.65	NA	NA	68.15	NA	NA	NA	NA		lissa	1	11	NA	NA	NA
L9-1	a	L9		field	NA	5	10-Jun	2016	05-Jun	130	60.6	NA	NA	36.8	NA	NA	NA	NA		lissa	1	11	-15.1749	20.391	0.051806
L9-1	a	L9		field	NA	8	13-Jun	2016	05-Jun	242	68.3	NA	NA	40.8	NA	NA	NA	NA		lissa	1	11	-15.1749	20.391	0.051806
L9-1	a	L9		field	NA	1	06-Jun	2016	05-Jun	54	49.2	NA	NA	26.5	NA	NA	NA	NA	1d - eigen	lissa	1	11	-15.1749	20.391	0.051806
L9-1	a	L9		field	NA	3	08-Jun	2016	05-Jun	93	54.8	NA	NA	30.4	NA	NA	NA	NA		lissa	1	11	-15.1749	20.391	0.051806
L9-1	a	L9		field	NA	10	15-Jun	2016	05-Jun	296	73.8	NA	NA	44.6	NA	NA	NA	NA		lissa	1	11	-15.1749	20.391	0.051806
L9-1	b	L9		field	NA	19	24-Jun	2016	05-Jun	615	91.61	NA	NA	60.94	NA	NA	NA	NA		lissa	1	11	-14.8354	20.5193	0.0498
L9-1	b	L9		field	NA	12	17-Jun	2016	05-Jun	408	78.7	NA	NA	50	NA	NA	NA	NA		lissa	1	11	-14.8354	20.5193	0.0498
L9-1	b	L9		field	NA	17	22-Jun	2016	05-Jun	545	89.4	NA	NA	57.2	NA	NA	NA	NA		lissa	1	11	-14.8354	20.5193	0.0498
L9-1	b	L9		field	NA	15	20-Jun	2016	05-Jun	183	63.1	NA	NA	37.4	NA	NA	NA	NA		lissa	1	11	-14.8354	20.5193	0.0498
L9-1	c	L9		field	NA	26	01-Jul	2016	05-Jun	815	103.3	NA	NA	64.4	NA	NA	NA	NA	ARO.N (l/u)	lissa	1	11	-15.1092	19.0677	0.0677961
L9-1	c	L9		field	NA	22	27-Jun	2016	05-Jun	787	97.5	NA	NA	62.8	NA	NA	NA	NA		lissa	1	11	-15.1092	19.0677	0.0677961
L9-1	c	L9		field	NA	29	04-Jul	2016	05-Jun	935	107.6	NA	NA	64.3	NA	NA	NA	NA		lissa	1	11	-15.1092	19.0677	0.0677961
L9-1	c	L9		field	NA	24	29-Jun	2016	05-Jun	763	99.93	NA	NA	62.55	NA	NA	NA	NA		lissa	1	11	-15.1092	19.0677	0.0677961
L9-1	NA	L9		field	NA	38	13-Jul	2016	05-Jun	834	115.2	NA	NA	64.89	NA	NA	NA	NA		lissa	1	11	NA	NA	NA
L9-1	NA	L9		field	NA	31	06-Jul	2016	05-Jun	839	109.51	NA	NA	64.46	NA	NA	NA	NA		lissa	1	11	NA	NA	NA
L9-1	NA	L9		field	NA	33	08-Jul	2016	05-Jun	836	111.6	NA	NA	65.5	NA	NA	NA	NA		lissa	1	11	NA	NA	NA
L9-2	a	L9		field	NA	1	06-Jun	2016	05-Jun	57	49.9	NA	NA	29	NA	NA	NA	NA	1d - eigen	lissa	2	11	-14.8587	19.8041	0.0561577
L9-2	a	L9		field	NA	5	10-Jun	2016	05-Jun	134	60.8	NA	NA	35.4	NA	NA	NA	NA		lissa	2	11	-14.8587	19.8041	0.0561577
L9-2	a	L9		field	NA	8	13-Jun	2016	05-Jun	233	67.1	NA	NA	42.7	NA	NA	NA	NA		lissa	2	11	-14.8587	19.8041	0.0561577
L9-2	a	L9		field	NA	10	15-Jun	2016	05-Jun	297	72.1	NA	NA	45.2	NA	NA	NA	NA		lissa	2	11	-14.8587	19.8041	0.0561577
L9-2	a	L9		field	NA	3	08-Jun	2016	05-Jun	91	54.9	NA	NA	31.7	NA	NA	NA	NA		lissa	2	11	-14.8587	19.8041	0.0561577
L9-2	b	L9		field	NA	15	20-Jun	2016	05-Jun	192	64	NA	NA	38.6	NA	NA	NA	NA		lissa	2	11	-14.7871	20.3545	0.0510635
L9-2	b	L9		field	NA	19	24-Jun	2016	05-Jun	533	86.72	NA	NA	59.04	NA	NA	NA	NA		lissa	2	11	-14.7871	20.3545	0.0510635
L9-2	b	L9		field	NA	17	22-Jun	2016	05-Jun	482	85	NA	NA	56.4	NA	NA	NA	NA		lissa	2	11	-14.7871	20.3545	0.0510635
L9-2	b	L9		field	NA	12	17-Jun	2016	05-Jun	356	76.6	NA	NA	50.2	NA	NA	NA	NA		lissa	2	11	-14.7871	20.3545	0.0510635
L9-2	c	L9		field	NA	24	29-Jun	2016	05-Jun	651	93.92	NA	NA	61.63	NA	NA	NA	NA		lissa	2	11	-14.7648	19.7399	0.0568257
L9-2	c	L9		field	NA	29	04-Jul	2016	05-Jun	692	99.3	NA	NA	62.4	NA	NA	NA	NA	AN.OR (l/u)	lissa	2	11	-14.7648	19.7399	0.0568257
L9-2	c	L9		field	NA	26	01-Jul	2016	05-Jun	720	95.9	NA	NA	61.6	NA	NA	NA	NA		lissa	2	11	-14.7648	19.7399	0.0568257
L9-2	c	L9		field	NA	22	27-Jun	2016	05-Jun	647	91.4	NA	NA	60	NA	NA	NA	NA		lissa	2	11	-14.7648	19.7399	0.0568257
L9-2	NA	L9		field	NA	38	13-Jul	2016	05-Jun	731	105.56	NA	NA	62.66	NA	NA	NA	NA		lissa	2	11	NA	NA	NA
L9-2	NA	L9		field	NA	33	08-Jul	2016	05-Jun	715	102.1	NA	NA	63.5	NA	NA	NA	NA		lissa	2	11	NA	NA	NA
L9-2	NA	L9		field	NA	31	06-Jul	2016	05-Jun	710	101.42	NA	NA	62.73	NA	NA	NA	NA		lissa	2	11	NA	NA	NA
L9-3	a	L9		field	NA	6	13-Jun	2016	07-Jun	179	64	NA	NA	39.5	NA	NA	NA	NA		lissa	3	13	-15.1757	19.9897	0.0563
L9-3	a	L9		field	NA	8	15-Jun	2016	07-Jun	229	69.4	NA	NA	42.3	NA	NA	NA	NA		lissa	3	13	-15.1757	19.9897	0.0563
L9-3	a	L9		field	NA	1	08-Jun	2016	07-Jun	66	51.2	NA	NA	26.7	NA	NA	NA	NA	1d - eigen	lissa	3	13	-15.1757	19.9897	0.0563
L9-3	a	L9		field	NA	3	10-Jun	2016	07-Jun	96	56.2	NA	NA	33.7	NA	NA	NA	NA		lissa	3	13	-15.1757	19.9897	0.0563
L9-3	a	L9		field	NA	10	17-Jun	2016	07-Jun	297	74.1	NA	NA	46.6	NA	NA	NA	NA		lissa	3	13	-15.1757	19.9897	0.0563
L9-3	b	L9		field	NA	15	22-Jun	2016	07-Jun	414	82.5	NA	NA	54.9	NA	NA	NA	NA		lissa	3	13	-15.0032	20.1305	0.0536863
L9-3	b	L9		field	NA	17	24-Jun	2016	07-Jun	461	86.19	NA	NA	57.38	NA	NA	NA	NA		lissa	3	13	-15.0032	20.1305	0.0536863
L9-3	b	L9		field	NA	20	27-Jun	2016	07-Jun	574	90.4	NA	NA	61.2	NA	NA	NA	NA		lissa	3	13	-15.0032	20.1305	0.0536863
L9-3	b	L9		field	NA	13	20-Jun	2016	07-Jun	97	53.5	NA	NA	NA	NA	NA	NA	NA		lissa	3	13	-15.0032	20.1305	0.0536863
L9-3	c	L9		field	NA	27	04-Jul	2016	07-Jun	677	99.8	NA	NA	62.9	NA	NA	NA	NA		lissa	3	13	-15.3889	19.2031	0.0672049
L9-3	c	L9		field	NA	29	06-Jul	2016	07-Jun	776	102.65	NA	NA	65.1	NA	NA	NA	NA		lissa	3	13	-15.3889	19.2031	0.0672049
L9-3	c	L9		field	NA	22	29-Jun	2016	07-Jun	642	93.26	NA	NA	61.35	NA	NA	NA	NA		lissa	3	13	-15.3889	19.2031	0.0672049
L9-3	c	L9		field	NA	24	01-Jul	2016	07-Jun	632	96.1	NA	NA	62.3	NA	NA	NA	NA		lissa	3	13	-15.3889	19.2031	0.0672049
L9-3	NA	L9		field	NA	36	13-Jul	2016	07-Jun	826	110.07	NA	NA	65.47	NA	NA	NA	NA	AXO.C (l/u)	lissa	3	13	NA	NA	NA
L9-3	NA	L9		field	NA	31	08-Jul	2016	07-Jun	786	104.8	NA	NA	64.5	NA	NA	NA	NA		lissa	3	13	NA	NA	NA
Laura1	a	laura		field	f	9	17-Jun	2016	08-Jun	166	60.4	NA	NA	35.6	NA	NA	NA	NA		gps	1	14	-17.8031	17.4553	0.129841
Laura1	a	laura		field	f	5	13-Jun	2016	08-Jun	71	51.2	NA	NA	28.3	NA	NA	NA	NA		gps	1	14	-17.8031	17.4553	0.129841
Laura1	a	laura		field	f	7	15-Jun	2016	08-Jun	106	55.4	NA	NA	32.5	NA	NA	NA	NA		gps	1	14	-17.8031	17.4553	0.129841
Laura1	a	laura		field	f	2	10-Jun	2016	08-Jun	53	46.1	NA	NA	25.6	NA	NA	NA	NA	0d - CF	gps	1	14	-17.8031	17.4553	0.129841
Laura1	b	laura		field	f	16	24-Jun	2016	08-Jun	371	74.8	NA	NA	47.09	NA	NA	NA	NA		gps	1	14	-17.4876	17.8942	0.111873
Laura1	b	laura		field	f	19	27-Jun	2016	08-Jun	420	78.9	NA	NA	53.3	NA	NA	NA	NA		gps	1	14	-17.4876	17.8942	0.111873
Laura1	b	laura		field	f	12	20-Jun	2016	08-Jun	241	66.1	NA	NA	40	NA	NA	NA	NA		gps	1	14	-17.4876	17.8942	0.111873
Laura1	b	laura		field	f	14	22-Jun	2016	08-Jun	315	71	NA	NA	45.3	NA	NA	NA	NA		gps	1	14	-17.4876	17.8942	0.111873
Laura1	c	laura		field	f	26	04-Jul	2016	08-Jun	536	86.1	NA	NA	58.3	NA	NA	NA	NA		gps	1	14	-17.553	17.3485	0.130376
Laura1	c	laura		field	f	28	06-Jul	2016	08-Jun	537	89.99	NA	NA	59.58	NA	NA	NA	NA		gps	1	14	-17.553	17.3485	0.130376
Laura1	c	laura		field	f	21	29-Jun	2016	08-Jun	439	82.11	NA	NA	55.57	NA	NA	NA	NA		gps	1	14	-17.553	17.3485	0.130376
Laura1	c	laura		field	f	23	01-Jul	2016	08-Jun	540	85.4	NA	NA	57.6	NA	NA	NA	NA		gps	1	14	-17.553	17.3485	0.130376
Laura1	c	laura		field	f	30	08-Jul	2016	08-Jun	504	89.7	NA	NA	60	NA	NA	NA	NA		gps	1	14	-17.553	17.3485	0.130376
Laura1	NA	laura		field	f	35	13-Jul	2016	08-Jun	555	93.15	NA	NA	60.35	NA	NA	NA	NA	A.WOP (l/u)	gps	1	14	NA	NA	NA
Marijke1	a	marijke		field	NA	4	17-Jun	2016	13-Jun	55	47.8	NA	NA	NA	NA	NA	NA	NA		gps	1	19	NA	NA	NA
Marijke1	a	marijke		field	NA	2	15-Jun	2016	13-Jun	46	43.5	NA	NA	NA	NA	NA	NA	NA		gps	1	19	NA	NA	NA
Marijke1	a	marijke		field	NA	9	22-Jun	2016	13-Jun	126	56.6	NA	NA	NA	NA	NA	NA	NA		gps	1	19	NA	NA	NA
Marijke1	a	marijke		field	NA	0	13-Jun	2016	13-Jun	NA	NA	NA	NA	NA	NA	NA	NA	NA		gps	1	19	NA	NA	NA
Marijke1	a	marijke		field	NA	7	20-Jun	2016	13-Jun	68	49.6	NA	NA	NA	NA	NA	NA	NA		gps	1	19	NA	NA	NA
Marijke1	b	marijke		field	NA	18	01-Jul	2016	13-Jun	356	74.2	NA	NA	NA	NA	NA	NA	NA		gps	1	19	NA	NA	NA
Marijke1	b	marijke		field	NA	14	27-Jun	2016	13-Jun	253	66.6	NA	NA	NA	NA	NA	NA	NA		gps	1	19	NA	NA	NA
Marijke1	c	marijke		field	NA	21	04-Jul	2016	13-Jun	420	79.4	NA	NA	NA	NA	NA	NA	NA		gps	1	19	NA	NA	NA
Marijke1	c	marijke		field	NA	23	06-Jul	2016	13-Jun	470	82.2	NA	NA	NA	NA	NA	NA	NA		gps	1	19	NA	NA	NA
Marijke1	c	marijke		field	NA	25	08-Jul	2016	13-Jun	570	86.2	NA	NA	NA	NA	NA	NA	NA		gps	1	19	NA	NA	NA
Marijke1	NA	marijke		field	NA	32	15-Jul	2016	13-Jun	698	93.6	NA	NA	NA	NA	NA	NA	NA		gps	1	19	NA	NA	NA
Marijke1	NA	marijke		field	NA	36	19-Jul	2016	13-Jun	664	99.8	NA	NA	NA	NA	NA	NA	NA		gps	1	19	NA	NA	NA
Marleen1	a	marleen		field	f	4	06-Jun	2016	02-Jun	88	51.2	NA	NA	29.7	NA	NA	NA	NA		gps	1	8	-19.7973	16.4541	0.19959
Marleen1	a	marleen		field	f	1	03-Jun	2016	02-Jun	61	46	NA	NA	23.6	NA	NA	NA	NA	1d - CF	gps	1	8	-19.7973	16.4541	0.19959
Marleen1	a	marleen		field	f	8	10-Jun	2016	02-Jun	188	63	NA	NA	37.2	NA	NA	NA	NA		gps	1	8	-19.7973	16.4541	0.19959
Marleen1	a	marleen		field	f	6	08-Jun	2016	02-Jun	122	56.6	NA	NA	33.7	NA	NA	NA	NA		gps	1	8	-19.7973	16.4541	0.19959
Marleen1	b	marleen		field	f	15	17-Jun	2016	02-Jun	355	76.2	NA	NA	50.4	NA	NA	NA	NA		gps	1	8	-19.5384	16.4348	0.196948
Marleen1	b	marleen		field	f	13	15-Jun	2016	02-Jun	315	72.5	NA	NA	46.5	NA	NA	NA	NA		gps	1	8	-19.5384	16.4348	0.196948
Marleen1	b	marleen		field	f	18	20-Jun	2016	02-Jun	493	81.4	NA	NA	53.3	NA	NA	NA	NA		gps	1	8	-19.5384	16.4348	0.196948
Marleen1	b	marleen		field	f	20	22-Jun	2016	02-Jun	604	84.6	NA	NA	54.2	NA	NA	NA	NA		gps	1	8	-19.5384	16.4348	0.196948
Marleen1	b	marleen		field	f	11	13-Jun	2016	02-Jun	283	68.3	NA	NA	42.9	NA	NA	NA	NA		gps	1	8	-19.5384	16.4348	0.196948
Marleen1	c	marleen		field	f	25	27-Jun	2016	02-Jun	697	90.6	NA	NA	58	NA	NA	NA	NA		gps	1	8	-19.9489	16.9466	0.176662
Marleen1	c	marleen		field	f	22	24-Jun	2016	02-Jun	647	87.55	NA	NA	58.21	NA	NA	NA	NA		gps	1	8	-19.9489	16.9466	0.176662
Marleen1	c	marleen		field	f	29	01-Jul	2016	02-Jun	479	92.1	NA	NA	59.1	NA	NA	NA	NA		gps	1	8	-19.9489	16.9466	0.176662
Marleen1	c	marleen		field	f	27	29-Jun	2016	02-Jun	485	92.1	NA	NA	61.36	NA	NA	NA	NA	zat vast in kippengaas!	gps	1	8	-19.9489	16.9466	0.176662
Marleen1	NA	marleen		field	f	36	08-Jul	2016	02-Jun	665	97.1	NA	NA	60	NA	NA	NA	NA		gps	1	8	NA	NA	NA
Marleen1	NA	marleen		field	f	41	13-Jul	2016	02-Jun	731	101.58	NA	NA	60.57	NA	NA	NA	NA	AU.OR (l/u)	gps	1	8	NA	NA	NA
Marleen1	NA	marleen		field	f	32	04-Jul	2016	02-Jun	560	92.4	NA	NA	59.8	NA	NA	NA	NA		gps	1	8	NA	NA	NA
Marleen1	NA	marleen		field	f	34	06-Jul	2016	02-Jun	613	94.84	NA	NA	61.08	NA	NA	NA	NA		gps	1	8	NA	NA	NA
Marleen2	a	marleen		field	m	4	06-Jun	2016	02-Jun	99	55.4	NA	NA	32.5	NA	NA	NA	NA		gps	2	8	-19.4872	16.7747	0.179463
Marleen2	a	marleen		field	m	8	10-Jun	2016	02-Jun	236	66.7	NA	NA	41	NA	NA	NA	NA		gps	2	8	-19.4872	16.7747	0.179463
Marleen2	a	marleen		field	m	1	03-Jun	2016	02-Jun	60	48.5	NA	NA	27.5	NA	NA	NA	NA	1d - CF	gps	2	8	-19.4872	16.7747	0.179463
Marleen2	a	marleen		field	m	6	08-Jun	2016	02-Jun	145	61.7	NA	NA	37.3	NA	NA	NA	NA		gps	2	8	-19.4872	16.7747	0.179463
Marleen2	b	marleen		field	m	11	13-Jun	2016	02-Jun	351	72.6	NA	NA	48	NA	NA	NA	NA		gps	2	8	-18.894	17.8698	0.126809
Marleen2	b	marleen		field	m	13	15-Jun	2016	02-Jun	376	77.2	NA	NA	51.5	NA	NA	NA	NA		gps	2	8	-18.894	17.8698	0.126809
Marleen2	b	marleen		field	m	15	17-Jun	2016	02-Jun	450	82.1	NA	NA	56.6	NA	NA	NA	NA		gps	2	8	-18.894	17.8698	0.126809
Marleen2	b	marleen		field	m	20	22-Jun	2016	02-Jun	703	91.7	NA	NA	59.6	NA	NA	NA	NA		gps	2	8	-18.894	17.8698	0.126809
Marleen2	b	marleen		field	m	18	20-Jun	2016	02-Jun	579	88.7	NA	NA	59.7	NA	NA	NA	NA		gps	2	8	-18.894	17.8698	0.126809
Marleen2	c	marleen		field	m	27	29-Jun	2016	02-Jun	831	102.73	NA	NA	67.16	NA	NA	NA	NA		gps	2	8	-18.6546	16.976	0.158556
Marleen2	c	marleen		field	m	25	27-Jun	2016	02-Jun	786	99.3	NA	NA	NA	NA	NA	NA	NA		gps	2	8	-18.6546	16.976	0.158556
Marleen2	c	marleen		field	m	29	01-Jul	2016	02-Jun	860	105.1	NA	NA	68.5	NA	NA	NA	NA	A.NOL (l/u)	gps	2	8	-18.6546	16.976	0.158556
Marleen2	c	marleen		field	m	22	24-Jun	2016	02-Jun	774	95.11	NA	NA	65.58	NA	NA	NA	NA		gps	2	8	-18.6546	16.976	0.158556
Marleen2	NA	marleen		field	m	34	06-Jul	2016	02-Jun	980	111.41	NA	NA	69.03	NA	NA	NA	NA		gps	2	8	NA	NA	NA
Marleen2	NA	marleen		field	m	36	08-Jul	2016	02-Jun	920	112.7	NA	NA	68.4	NA	NA	NA	NA		gps	2	8	NA	NA	NA
Marleen2	NA	marleen		field	m	32	04-Jul	2016	02-Jun	911	108.5	NA	NA	69.4	NA	NA	NA	NA		gps	2	8	NA	NA	NA
Noel1	a	noel		field	NA	5	13-Jun	2016	08-Jun	126	NA	NA	NA	NA	NA	NA	NA	NA		gps	1	14	NA	NA	NA
Noel1	a	noel		field	NA	2	10-Jun	2016	08-Jun	NA	NA	NA	NA	NA	NA	NA	NA	NA	1 dag dood	gps	1	14	NA	NA	NA
Noel1	a	noel		field	NA	0	08-Jun	2016	08-Jun	61	47.8	NA	NA	NA	NA	NA	NA	NA		gps	1	14	NA	NA	NA
Noel1	a	noel		field	NA	7	15-Jun	2016	08-Jun	NA	61.3	NA	NA	NA	NA	NA	NA	NA		gps	1	14	NA	NA	NA
Noel1	a	noel		field	NA	9	17-Jun	2016	08-Jun	167	64.1	NA	NA	NA	NA	NA	NA	NA		gps	1	14	NA	NA	NA
Noel1	a	noel		field	NA	2	10-Jun	2016	08-Jun	68	50.6	NA	NA	NA	NA	NA	NA	NA		gps	1	14	NA	NA	NA
Noel1	b	noel		field	NA	19	27-Jun	2016	08-Jun	363	79.6	NA	NA	NA	NA	NA	NA	NA		gps	1	14	NA	NA	NA
Noel1	b	noel		field	NA	14	22-Jun	2016	08-Jun	300	72.2	NA	NA	NA	NA	NA	NA	NA		gps	1	14	NA	NA	NA
Noel1	b	noel		field	NA	12	20-Jun	2016	08-Jun	228	68.2	NA	NA	NA	NA	NA	NA	NA		gps	1	14	NA	NA	NA
Noel1	c	noel		field	NA	23	01-Jul	2016	08-Jun	431	84	NA	NA	NA	NA	NA	NA	NA		gps	1	14	NA	NA	NA
Noel1	c	noel		field	NA	26	04-Jul	2016	08-Jun	NA	NA	NA	NA	NA	NA	NA	NA	NA	DOOD	gps	1	14	NA	NA	NA
Peter1	a	peter	ella	field	f	1	03-Jun	2016	02-Jun	71	48.9	NA	NA	25.2	NA	NA	NA	NA		gps	2	8	-18.685	14.819	0.276417
Peter1	a	peter	ella	field	f	4	06-Jun	2016	02-Jun	142	57.4	NA	NA	33	NA	NA	NA	NA		gps	2	8	-18.685	14.819	0.276417
Peter1	a	peter	ella	field	f	8	10-Jun	2016	02-Jun	234	67.9	NA	NA	39.8	NA	NA	NA	NA		gps	2	8	-18.685	14.819	0.276417
Peter1	a	peter	ella	field	f	6	08-Jun	2016	02-Jun	170	63.1	NA	NA	37.7	NA	NA	NA	NA		gps	2	8	-18.685	14.819	0.276417
Peter1	b	peter	ella	field	f	15	17-Jun	2016	02-Jun	403	79.9	NA	NA	54.1	NA	NA	NA	NA		gps	2	8	-18.7494	15.2459	0.253314
Peter1	b	peter	ella	field	f	18	20-Jun	2016	02-Jun	523	86.3	NA	NA	56.4	NA	NA	NA	NA		gps	2	8	-18.7494	15.2459	0.253314
Peter1	b	peter	ella	field	f	13	15-Jun	2016	02-Jun	387	77.2	NA	NA	50.3	NA	NA	NA	NA		gps	2	8	-18.7494	15.2459	0.253314
Peter1	b	peter	ella	field	f	11	13-Jun	2016	02-Jun	368	73.5	NA	NA	48.2	NA	NA	NA	NA		gps	2	8	-18.7494	15.2459	0.253314
Peter1	b	peter	ella	field	f	20	22-Jun	2016	02-Jun	592	89.5	NA	NA	57.4	NA	NA	NA	NA		gps	2	8	-18.7494	15.2459	0.253314
Peter1	c	peter	ella	field	f	27	29-Jun	2016	02-Jun	628	96.95	NA	NA	60.64	NA	NA	NA	NA	A.POW (l/u)	gps	2	8	-18.8008	13.9439	0.336117
Peter1	c	peter	ella	field	f	22	24-Jun	2016	02-Jun	651	92.05	NA	NA	59.05	NA	NA	NA	NA		gps	2	8	-18.8008	13.9439	0.336117
Peter1	c	peter	ella	field	f	25	27-Jun	2016	02-Jun	697	95	NA	NA	59.9	NA	NA	NA	NA		gps	2	8	-18.8008	13.9439	0.336117
Peter1	c	peter	ella	field	f	29	01-Jul	2016	02-Jun	658	98.8	NA	NA	60.2	NA	NA	NA	NA		gps	2	8	-18.8008	13.9439	0.336117
Peter1	NA	peter	ella	field	f	32	04-Jul	2016	02-Jun	704	101	NA	NA	61.1	NA	NA	NA	NA		gps	2	8	NA	NA	NA
Peter2	a	peter	ella	field	f	10	10-Jun	2016	31-May	307	71	NA	NA	46.8	NA	NA	NA	NA		gps	1	6	-19.6407	14.071	0.348714
Peter2	a	peter	ella	field	f	6	06-Jun	2016	31-May	155	60.7	NA	NA	38.5	NA	NA	NA	NA		gps	1	6	-19.6407	14.071	0.348714
Peter2	a	peter	ella	field	f	1	01-Jun	2016	31-May	73	47.4	NA	NA	27.4	NA	NA	NA	NA	1d - CF	gps	1	6	-19.6407	14.071	0.348714
Peter2	a	peter	ella	field	f	3	03-Jun	2016	31-May	88	51.5	NA	NA	29.9	NA	NA	NA	NA		gps	1	6	-19.6407	14.071	0.348714
Peter2	a	peter	ella	field	f	8	08-Jun	2016	31-May	236	65.7	NA	NA	42.6	NA	NA	NA	NA		gps	1	6	-19.6407	14.071	0.348714
Peter2	b	peter	ella	field	f	15	15-Jun	2016	31-May	457	81.3	NA	NA	54.9	NA	NA	NA	NA		gps	1	6	-19.3995	14.4405	0.319142
Peter2	b	peter	ella	field	f	13	13-Jun	2016	31-May	412	77.3	NA	NA	54.1	NA	NA	NA	NA		gps	1	6	-19.3995	14.4405	0.319142
Peter2	b	peter	ella	field	f	20	20-Jun	2016	31-May	565	88.8	NA	NA	61.3	NA	NA	NA	NA		gps	1	6	-19.3995	14.4405	0.319142
Peter2	b	peter	ella	field	f	17	17-Jun	2016	31-May	523	85.3	NA	NA	58.3	NA	NA	NA	NA		gps	1	6	-19.3995	14.4405	0.319142
Peter2	c	peter	ella	field	f	27	27-Jun	2016	31-May	663	96.1	NA	NA	62.3	NA	NA	NA	NA		gps	1	6	-19.975	12.3275	0.466795
Peter2	c	peter	ella	field	f	29	29-Jun	2016	31-May	604	97.78	NA	NA	62.83	NA	NA	NA	NA	A.NOH (l/u)	gps	1	6	-19.975	12.3275	0.466795
Peter2	c	peter	ella	field	f	24	24-Jun	2016	31-May	622	94.05	NA	NA	63.12	NA	NA	NA	NA		gps	1	6	-19.975	12.3275	0.466795
Peter2	c	peter	ella	field	f	22	22-Jun	2016	31-May	608	92.1	NA	NA	63.2	NA	NA	NA	NA		gps	1	6	-19.975	12.3275	0.466795
Peter2	NA	peter	ella	field	f	31	01-Jul	2016	31-May	583	98.3	NA	NA	62.7	NA	NA	NA	NA		gps	1	6	NA	NA	NA
Peter2	NA	peter	ella	field	f	34	04-Jul	2016	31-May	605	100.6	NA	NA	62.9	NA	NA	NA	NA		gps	1	6	NA	NA	NA
Romelo2	a	romelo		field	NA	5	15-Jun	2016	10-Jun	135	59.1	NA	NA	NA	NA	NA	NA	NA		gps	2	16	NA	NA	NA
Romelo2	a	romelo		field	NA	0	10-Jun	2016	10-Jun	59	47	NA	NA	NA	NA	NA	NA	NA		gps	2	16	NA	NA	NA
Romelo2	a	romelo		field	NA	7	17-Jun	2016	10-Jun	201	64.5	NA	NA	NA	NA	NA	NA	NA		gps	2	16	NA	NA	NA
Romelo2	a	romelo		field	NA	3	13-Jun	2016	10-Jun	83	54.1	NA	NA	NA	NA	NA	NA	NA		gps	2	16	NA	NA	NA
Romelo3	a	romelo		field	NA	6	17-Jun	2016	11-Jun	151	59.6	NA	NA	NA	NA	NA	NA	NA		gps	3	17	NA	NA	NA
Romelo3	a	romelo		field	NA	2	13-Jun	2016	11-Jun	71	50.9	NA	NA	NA	NA	NA	NA	NA		gps	3	17	NA	NA	NA
Romelo3	a	romelo		field	NA	4	15-Jun	2016	11-Jun	97	54.2	NA	NA	NA	NA	NA	NA	NA		gps	3	17	NA	NA	NA
Romelo3	c	romelo		field	NA	23	04-Jul	2016	11-Jun	469	87.2	NA	NA	NA	NA	NA	NA	NA		gps	3	17	NA	NA	NA
Romelo3	NA	romelo		field	NA	32	13-Jul	2016	11-Jun	690	98.7	NA	NA	NA	NA	NA	NA	NA		gps	3	17	NA	NA	NA
Sjarel1	a	sjarel	sam	field	m	6	01-Jun	2016	26-May	142	60.7	NA	NA	34.8	NA	NA	NA	NA		gps	1	1	NA	NA	NA
Sjarel1	a	sjarel	sam	field	m	8	03-Jun	2016	26-May	180	65.5	NA	NA	36.5	NA	NA	NA	NA		gps	1	1	NA	NA	NA
Sjarel1	a	sjarel	sam	field	m	4	30-May	2016	26-May	120	56.8	NA	NA	33.5	NA	NA	NA	NA		gps	1	1	NA	NA	NA
Sjarel1	a	sjarel	sam	field	m	1	27-May	2016	26-May	63	48.9	NA	NA	27.9	NA	NA	NA	NA	1d - eigen	gps	1	1	NA	NA	NA
Sjarel1	b	sjarel	sam	field	m	18	13-Jun	2016	26-May	451	85.1	NA	NA	53.2	NA	NA	NA	NA		gps	1	1	NA	NA	NA
Sjarel1	b	sjarel	sam	field	m	11	06-Jun	2016	26-May	285	72.2	NA	NA	44	NA	NA	NA	NA		gps	1	1	NA	NA	NA
Sjarel1	b	sjarel	sam	field	m	13	08-Jun	2016	26-May	365	77.6	NA	NA	45.5	NA	NA	NA	NA		gps	1	1	NA	NA	NA
Sjarel1	b	sjarel	sam	field	m	15	10-Jun	2016	26-May	405	80	NA	NA	48.3	NA	NA	NA	NA		gps	1	1	NA	NA	NA
Sjarel2	a	sjarel	sam	field	m	1	27-May	2016	26-May	54	48.2	NA	NA	26.6	NA	NA	NA	NA	1d - eigen	gps	2	1	-19.0964	17.6041	0.137204
Sjarel2	a	sjarel	sam	field	m	4	30-May	2016	26-May	72	53.3	NA	NA	29.7	NA	NA	NA	NA		gps	2	1	-19.0964	17.6041	0.137204
Sjarel2	a	sjarel	sam	field	m	6	01-Jun	2016	26-May	115	57.3	NA	NA	28.9	NA	NA	NA	NA		gps	2	1	-19.0964	17.6041	0.137204
Sjarel2	a	sjarel	sam	field	m	8	03-Jun	2016	26-May	147	61.5	NA	NA	31.8	NA	NA	NA	NA		gps	2	1	-19.0964	17.6041	0.137204
Sjarel2	b	sjarel	sam	field	m	13	08-Jun	2016	26-May	290	74.4	NA	NA	44.1	NA	NA	NA	NA		gps	2	1	-20.2993	15.5322	0.263244
Sjarel2	b	sjarel	sam	field	m	15	10-Jun	2016	26-May	347	78.2	NA	NA	43.9	NA	NA	NA	NA		gps	2	1	-20.2993	15.5322	0.263244
Sjarel2	b	sjarel	sam	field	m	18	13-Jun	2016	26-May	426	82	NA	NA	50.7	NA	NA	NA	NA		gps	2	1	-20.2993	15.5322	0.263244
Sjarel2	b	sjarel	sam	field	m	20	15-Jun	2016	26-May	501	84.8	NA	NA	53.9	NA	NA	NA	NA		gps	2	1	-20.2993	15.5322	0.263244
Sjarel2	b	sjarel	sam	field	m	11	06-Jun	2016	26-May	287	68.9	NA	NA	40.9	NA	NA	NA	NA		gps	2	1	-20.2993	15.5322	0.263244
Sjarel2	c	sjarel	sam	field	m	25	20-Jun	2016	26-May	619	92.6	NA	NA	59.2	NA	NA	NA	NA		gps	2	1	-21.0368	14.9063	0.317108
Sjarel2	c	sjarel	sam	field	m	27	22-Jun	2016	26-May	618	94.5	NA	NA	62.6	NA	NA	NA	NA		gps	2	1	-21.0368	14.9063	0.317108
Sjarel2	c	sjarel	sam	field	m	29	24-Jun	2016	26-May	725	97.58	NA	NA	62.64	NA	NA	NA	NA		gps	2	1	-21.0368	14.9063	0.317108
Sjarel2	c	sjarel	sam	field	m	22	17-Jun	2016	26-May	500	88.7	NA	NA	58	NA	NA	NA	NA		gps	2	1	-21.0368	14.9063	0.317108
Sjarel2	NA	sjarel	sam	field	m	39	04-Jul	2016	26-May	831	107.7	NA	NA	65.2	NA	NA	NA	NA		gps	2	1	NA	NA	NA
Sjarel2	NA	sjarel	sam	field	m	36	01-Jul	2016	26-May	813	105	NA	NA	63.6	NA	NA	NA	NA		gps	2	1	NA	NA	NA
Sjarel2	NA	sjarel	sam	field	m	32	27-Jun	2016	26-May	695	100.6	NA	NA	64.2	NA	NA	NA	NA	A.BOT (l/u)	gps	2	1	NA	NA	NA
Sjarel2	NA	sjarel	sam	field	m	34	29-Jun	2016	26-May	733	102.41	NA	NA	63.87	NA	NA	NA	NA		gps	2	1	NA	NA	NA
Sjarel2	NA	sjarel	sam	field	m	41	06-Jul	2016	26-May	830	109.14	NA	NA	64.27	NA	NA	NA	NA		gps	2	1	NA	NA	NA
